# Supplementary material for: Association of industry ties with outcomes of studies examining the effect of wholegrain foods on cardiovascular disease and mortality: systematic review and meta-analysis
Source: PubMed Central journal article supplement — BMJ Open. 2019 May 19;9(5):e022912. doi: 10.1136/bmjopen-2018-022912 (PMC6530454; doi:10.1136/bmjopen-2018-022912), 2019-05-19
Supplement: bmjopen-2018-022912.draft_revisions.pdf [file bmjopen-2018-022912.draft_revisions.pdf]

# BMJ Open

BMJ Open is committed to open peer review. As part of this commitment we make the peer review history of every article we publish publicly available.

When an article is published we post the peer reviewers' comments and the authors' responses online. We also post the versions of the paper that were used during peer review. These are the versions that the peer review comments apply to.

The versions of the paper that follow are the versions that were submitted during the peer review process. They are not the versions of record or the final published versions. They should not be cited or distributed as the published version of this manuscript.

BMJ Open is an open access journal and the full, final, typeset and author-corrected version of record of the manuscript is available on our site with no access controls, subscription charges or pay-per-view fees (<http://bmjopen.bmj.com>).

If you have any questions on BMJ Open's open peer review process please email [editorial.bmjopen@bmj.com](mailto:editorial.bmjopen@bmj.com)

# BMJ Open

## The association of industry sponsorship with outcomes of studies examining the effect of wholegrain foods on cardiovascular disease and mortality: Systematic review and Meta-analysis

|                               |                                                                                                                                                                                                                                                                                                                                                                                                 |
|-------------------------------|-------------------------------------------------------------------------------------------------------------------------------------------------------------------------------------------------------------------------------------------------------------------------------------------------------------------------------------------------------------------------------------------------|
| Journal:                      | <i>BMJ Open</i>                                                                                                                                                                                                                                                                                                                                                                                 |
| Manuscript ID                 | bmjopen-2018-022912                                                                                                                                                                                                                                                                                                                                                                             |
| Article Type:                 | Research                                                                                                                                                                                                                                                                                                                                                                                        |
| Date Submitted by the Author: | 14-Mar-2018                                                                                                                                                                                                                                                                                                                                                                                     |
| Complete List of Authors:     | Chartres, Nicholas; The University of Sydney, Faculty of Pharmacy<br>Fabbri, Alice; The University of Sydney<br>McDonald, Sally ; The University of Sydney<br>Turton, Jessica; The University of Sydney<br>Allman-Farinelli, Margaret; University of Sydney, Faculty of Science<br>McKenzie, Joanne; Monash University<br>Bero, Lisa; University of Sydney Faculty of Health Sciences, Pharmacy |
| Keywords:                     | NUTRITION & DIETETICS, STATISTICS & RESEARCH METHODS, PUBLIC HEALTH                                                                                                                                                                                                                                                                                                                             |
|                               |                                                                                                                                                                                                                                                                                                                                                                                                 |

SCHOLARONE™  
Manuscripts

1  
2  
3 1 **The association of industry sponsorship with outcomes of studies examining the effect of**  
4 **wholegrain foods on cardiovascular disease and mortality: Systematic review and Meta-**  
5 **2 analysis**  
6  
7  
8  
9 4

10 5 Chartres N, The University of Sydney, D17, The Hub, 6th floor, Charles Perkins Centre, The  
11 University of Sydney, NSW, 2006, Australia, PhD Candidate  
12  
13 6

14 7  
15  
16 8 Fabbri A, The University of Sydney, D17, The Hub, 6th floor, Charles Perkins Centre, The  
17 University of Sydney, NSW, 2006, Australia, Postdoctoral Research Fellow  
18 9

19 10  
20 11 McDonald S, The University of Sydney, D17, The Hub, 6th floor, Charles Perkins Centre, The  
21 University of Sydney, NSW, 2006, Research Assistant  
22 12  
23 12

24 13  
25 14 Turton J, The University of Sydney, University of Sydney, D17, The Hub, 6th floor, Charles  
26 Perkins Centre, The University of Sydney, NSW, 2006, Australia  
27 15  
28 16

29 17 Allman-Farinelli M, The University of Sydney, D17, The Hub, 4th floor, Charles Perkins Centre,  
30 The University of Sydney, NSW, 2006, Australia, Professor  
31 18  
32 19

33 20 McKenzie J E, Monash University, 553 St Kilda Road, Melbourne, VIC, 3004, Australia, Senior  
34 Research Fellow  
35 21  
36 22

37 23 Bero L, The University of Sydney, D17, The Hub, 6th floor, Charles Perkins Centre, The University  
38 of Sydney, NSW, 2006, Australia, Professor  
39 24  
40 25

41 26 **Corresponding author:** Prof. Lisa Bero, email [lisa.bero@sydney.edu.au](mailto:lisa.bero@sydney.edu.au); Telephone +612 8627  
42 1881  
43 27

44 28 **Keywords:** Nutrition, Industry Sponsorship, Conflict of Interest, Bias, Food Industry  
45  
46  
47  
48  
49  
50  
51  
52

29 **Word Count: 4264**

For peer review only

1  
2  
3 30 **Abstract**

4  
5 31 **Objective:** To determine if the presence of food industry sponsorship or author conflicts of  
6  
7 32 interest with the food industry (COI) (industry ties) in primary nutrition studies examining the  
8  
9 33 association of wholegrain foods with cardiovascular disease outcomes is associated with  
10  
11 34 statistical significance of results, effect size or conclusions that favour the study sponsor. To  
12  
13 35 determine whether studies with industry ties differ in their risk of bias compared with studies  
14  
15 36 with no industry ties.

16  
17  
18  
19 37 **Design:** Systematic review and meta-analysis of observational studies.

20  
21  
22 38 **Data sources:** We searched 8 databases from 1997-2017 and hand searched the reference lists  
23  
24 39 of included studies.

25  
26  
27 40 **Eligibility Criteria for selecting studies:** Primary observational studies that quantitatively  
28  
29 41 examined the association of wholegrains or wholegrain foods with cardiovascular disease  
30  
31 42 outcomes in healthy adults or children.

32  
33  
34 43 **Results:** 21 of the 22 studies had a serious or critical risk of bias. Studies with industry ties were  
35  
36 44 more likely to have favourable results than those with no industry ties, RR= 1.44 (95% CI 0.88-  
37  
38 45 2.35), although the difference was not statistically significant. The same association was found  
39  
40 46 for study conclusions. We did not find an important difference in effect size (magnitude of RRs)  
41  
42 47 between studies with industry ties, RR = 0.77 (95% CI 0.58-1.01) and studies with no industry  
43  
44 48 ties, RR = 0.85 (95% CI 0.73-1.00) (P=0.50) I<sup>2</sup> 0%. These results were comparable for studies that  
45  
46 49 measured the magnitude using hazard ratios; industry ties HR=0.82 (95% CI 0.76-0.88) vs. no  
47  
48 50 industry ties HR=0.86 (95% CI 0.81-0.91) (P=0.34) I<sup>2</sup> 0%.

1  
2  
3 51 **Conclusions:** These findings suggest, but do not establish, that the presence of food industry  
4  
5  
6 52 sponsorship or authors with a COI with the food industry, may be associated with both results  
7  
8 53 and conclusions that favour industry sponsors. Our findings support international reforms to  
9  
10 54 improve the disclosure and management of the conflicts of interest in nutrition research.

11  
12  
13 55 **Systematic review registration:** PROSPERO ID CRD42017055841  
14

15 56

16  
17 57

18  
19 58

20  
21 59

22  
23 60

24  
25 61

26  
27 62

28  
29 63

30  
31 64

32  
33 65

34  
35 66  
36  
37  
38  
39  
40  
41  
42  
43  
44  
45  
46  
47  
48  
49  
50  
51  
52  
53  
54  
55  
56  
57  
58  
59  
60

1  
2  
3 67 **Strengths and limitations of this study**  
4

- 5 68 - This is the first systematic review and meta-analysis to evaluate the association of  
6  
7  
8 69 industry sponsorship and author conflicts of interest (COI) with the results, conclusions  
9  
10 70 and risk of bias of primary nutrition studies examining the effect of wholegrain foods on  
11  
12  
13 71 cardiovascular disease outcomes.  
14  
15 72 - We conducted a comprehensive search and followed explicit and well-defined inclusion  
16  
17  
18 73 and exclusion criteria for the included studies.  
19  
20 74 - Although our sample was small, we searched several databases and reference lists of  
21  
22  
23 75 included studies.  
24  
25 76 - We did not attempt to contact the authors of studies lacking a COI disclosure statement,  
26  
27  
28 77 thus, we may be underestimating the number of articles that had authors with conflicts  
29  
30 78 of interest.  
31  
32 79 - Our assessment of risk of bias in the included studies was based on a tool that is under  
33  
34  
35 80 development, but changes to the tool are unlikely to affect the risk of bias ratings.  
36  
37 81

## 82 **Background**

83 Dietary guidelines are designed to promote wellbeing and reduce the risk of non-communicable  
84 diseases. Recent evaluations of the development of dietary guidelines have identified concerns  
85 with the methods of the systematic reviews and how evidence from these reviews is  
86 synthesised into final recommendations.<sup>1-3</sup> Several countries, including the United Kingdom,  
87 United States, and Australia have dietary guidelines offering recommendations around the  
88 consumption of wholegrain foods.<sup>4-6</sup> These recommendations are supported by recent  
89 systematic reviews and meta-analyses of prospective cohort studies, which have found a  
90 consistent, inverse relationship between wholegrain intake and cardiovascular disease (CVD)  
91 risk and mortality.<sup>7-9</sup>

92  
93 Dietary guidelines use a variety of methods to assess bias in primary research studies, but these  
94 do not assess one potential source of bias – financial conflicts of interest.<sup>10</sup> Across a variety of  
95 research areas, industry sponsorship and author conflicts of interest (COI) have been found to  
96 be associated with outcomes that favour the study sponsor.<sup>11-13</sup> Even when controlling for  
97 methodological biases, industry sponsored studies are more likely to have results that favour  
98 the sponsor's product than those studies with no or other sources of sponsorship.<sup>11</sup> Industry  
99 sponsors may bias research via the questions they ask (research agenda), how they design and  
100 conduct a study, the selection of results they report and through 'spin' on conclusions.<sup>14-17</sup>

101



1  
2  
3 102 A systematic review of methodological studies that compared food industry sponsored studies  
4  
5 103 with those that had no or other sources of sponsorship found that food industry sponsored  
6  
7  
8 104 studies were more likely to have favourable conclusions than non-industry sponsored studies.<sup>18</sup>  
9

10 105 However, there were insufficient data to quantitatively assesses the association of sponsorship  
11  
12 106 with study results. Only one methodological study examined the association of author COI and  
13  
14  
15 107 conclusions, and found a statistically significant association between them.<sup>19</sup>  
16  
17

18 108  
19  
20 109 Funding sources and author COI may be a risk of bias in studies of wholegrain consumption as  
21  
22 110 these studies could test formulated or processed wholegrain products, such as breakfast  
23  
24  
25 111 cereals. Industry sponsors may gain financially from finding that these types of products have  
26  
27 112 health benefits that can be used to market their products. There has been no assessment of the  
28  
29  
30 113 association of food industry sponsorship and author COI with the food industry and the  
31  
32 114 statistical significance of results, effect sizes, conclusions and risk of bias of observational  
33  
34  
35 115 studies examining the cardiovascular health benefits of wholegrain consumption. The primary  
36  
37 116 objective of this review is to determine whether:

- 38  
39  
40 117 • Primary studies examining the association of wholegrain foods with cardiovascular  
41  
42 118 disease with food industry sponsorship and / or authors with COI with the food industry  
43  
44  
45 119 are more likely to have results and/ or conclusions that are favourable to industry than  
46  
47 120 those with no industry ties.  
48  
49  
50 121 • This review also examines whether any differences between industry and non-industry  
51  
52 122 sponsored studies could be related to their methods or interpretation of results.  
53  
54  
55

1  
2  
3 123 The secondary objectives of this review are to determine whether:  
4  
5

6 124 • Studies with food industry sponsorship and / or authors with COI with the food industry  
7  
8  
9 125 differ in their risk of bias compared with studies with no industry ties.  
10

11  
12 126 • Studies with food industry sponsorship and / or authors with COI with the food industry  
13  
14 127 have a higher level of discordance between study results and conclusions, with the  
15  
16 128 conclusions more likely to be favourable compared to the results.  
17  
18  
19

## 20 129 **METHODS**

21  
22  
23 130 We conducted a systematic review of observational studies examining the association of  
24  
25 131 wholegrain consumption with cardiovascular disease.  
26  
27

### 28 132 29 30 133 **Literature search strategy**

31  
32 134 The search was based on the Process Manual used in the development of the 2013 Australian  
33  
34 135 Dietary Guidelines<sup>20</sup> and the advice of an information specialist. We searched the following  
35  
36 136 databases from January 1997-October 2017: MEDLINE; CINAHL; PubMed; PreMEDLINE;  
37  
38 137 Cochrane Library; PsycINFO; Science Direct; and ERIC. The search strategy we used for Ovid  
39  
40 138 MEDLINE is shown in Supplementary file 1. We adapted this strategy for the other databases.  
41  
42 139 We also hand searched the references lists of identified studies and reviews. The search also  
43  
44 140 included terms for randomized control trials to identify relevant trials for a future systematic  
45  
46 141 review.  
47  
48  
49  
50  
51

### 52 142 53 54 143 **Eligibility Criteria**

1  
2  
3 144 This review included primary nutrition studies of cohort or case control designs that  
4  
5  
6 145 quantitatively examined the benefits or harms of wholegrain consumption related to  
7  
8 146 cardiovascular disease outcomes in healthy children and/or adults.  
9

10 147  
11  
12  
13 148 We included studies that defined wholegrains in any way, as defined by the author. If total  
14  
15 149 wholegrain consumption had been assessed in the study, we included this as our only exposure.  
16  
17  
18 150 If total wholegrain consumption as an exposure was not available, we included any type of  
19  
20 151 wholegrain consumption (i.e. wholegrain cereal, breakfast cereal, bread, rice etc) as our  
21  
22 152 exposure. We included studies that compared wholegrain food to other foods or compared  
23  
24  
25 153 various levels of wholegrain consumption. We included the result representing the effect of the  
26  
27 154 highest level of wholegrain consumption compared to the lowest level of wholegrain  
28  
29  
30 155 consumption (e.g., 'yes' to wholegrain consumption vs. 'no' to wholegrain consumption, tertile  
31  
32 156 3 vs. tertile 1, quartile 4 vs. quartile 1, quintile 5 vs. quintile 1). If our pre-specified rules for  
33  
34  
35 157 selection did not uniquely identify one exposure for inclusion in the meta-analysis, we randomly  
36  
37 158 selected one result.  
38  
39

40 159  
41  
42 160 We included studies that had a clinical outcome measure related to cardiovascular disease,  
43  
44 161 defined as mortality related to specific cardiovascular events, and/or cardiovascular events,  
45  
46 162 (e.g., first myocardial infarction, total stroke etc.). If 'cardiovascular disease mortality/death/s'  
47  
48  
49 163 (verbatim) had been assessed, we included this as our only outcome. If not, we included any  
50  
51 164 type of cardiovascular disease mortality (e.g., coronary heart disease mortality, stroke mortality  
52  
53  
54 165 etc.) as our outcome. If there were no mortality outcomes assessed in the study, we included

1  
2  
3 166 any cardiovascular disease event as our outcome. If a study assessed subgroups of  
4  
5 167 cardiovascular disease deaths and events (e.g., intracerebral haemorrhages, ischaemic stroke)  
6  
7  
8 168 and also assessed them collectively (e.g., cerebrovascular diseases), we took the result that had  
9  
10 169 assessed them collectively. If our pre-specified rules for selection did not uniquely identify one  
11  
12  
13 170 outcome for inclusion in the meta-analysis, we randomly selected one result.  
14

15 171  
16  
17  
18 172 We excluded conferences presentations, opinion pieces and letters to the editor. We had no  
19  
20 173 language restrictions.  
21  
22

23 174

## 25 175 **Types of Outcome Measures**

26  
27 176

### 30 177 **Primary Outcomes**

31  
32 178 We hypothesized that studies with food industry sponsorship and/or authors with a COI with  
33  
34  
35 179 the food industry would be more likely to have favourable findings than those with no industry  
36  
37 180 ties. We assessed three primary outcomes:

38  
39  
40 181 1. Statistical significance of results favourable to the sponsor

41  
42 182 Favourable results were defined as results that were favourable to the sponsor's product(s),  
43  
44  
45 183 either indicating greater health benefits or less harm than the comparator. Specifically, for  
46  
47 184 studies of health benefits of wholegrains, favourable results were defined as those that were  
48  
49 185 statistically significant at the 0.05 level. For studies of harms of wholegrains, favourable results  
50  
51  
52 186 were defined as those where harms were not statistically significant at the 0.05 level or there  
53  
54  
55

1  
2  
3 187 were a statistically significant higher number of harms in the comparator group. Otherwise,  
4  
5 188 results were classified as unfavourable.  
6  
7

8 189

9  
10 190 2. Effect size of results  
11  
12

13 191

14  
15 192 Effect size was defined as the risk ratio of the association between whole grains and a clinical  
16  
17 193 outcome of cardiovascular disease. We compared the magnitude of the pooled effect estimates  
18  
19 194 in studies with food industry sponsorship and/or authors with a COI compared with studies with  
20  
21 195 no industry ties.  
22  
23  
24

25 196

26  
27 197 3. Conclusions  
28  
29

30 198

31  
32 199 Conclusions that suggested that the wholegrain intervention being studied was beneficial to  
33  
34 200 health and / or safe were considered favourable to the study sponsor. Otherwise, the  
35  
36 201 conclusions were considered unfavourable.  
37  
38  
39

40 202

41  
42 203  
43  
44  
45  
46  
47  
48  
49  
50  
51  
52  
53  
54  
55

1  
2  
3 204 **Secondary Outcomes**  
4

5  
6 205 We assessed two secondary outcomes:  
7

8  
9 206 1. The risk of bias of the included studies  
10

11 207  
12

13  
14 208 We hypothesized that studies with industry sponsorship and/or authors with a COI with the  
15

16 209 food industry would have the same overall risk of bias as those with no industry ties.  
17  
18

19 210  
20

21  
22 211 2. Concordance between study results and conclusions  
23

24 212  
25

26  
27 213 We hypothesized that studies with industry sponsorship and/or authors with a COI would be  
28

29 214 more likely to have discordant results and conclusions, with results not favouring the sponsor  
30

31 215 and conclusions favouring the sponsor, than those with no industry ties.  
32  
33

34 216  
35

36 217 **Selection of studies**  
37

38  
39 218 Three investigators (NC, SMc & JT, working in pairs) independently screened the titles and  
40

41 219 abstracts of all retrieved records for obvious exclusions. Full text of potentially eligible studies  
42

43  
44 220 was then retrieved, and three investigators (NC, SMc & JT) assessed these against our inclusion  
45

46 221 criteria. Agreement was reached by consensus.  
47  
48

49 222  
50

51 223  
52  
53  
54  
55

1  
2  
3 224 **Data Collection and analysis**  
4

5 225 Three assessors (NC, SMc & JT) independently extracted the following data from each included  
6  
7 226 study. Discrepancies in data extraction were resolved by consensus. If agreement could not be  
8  
9  
10 227 reached, a fourth assessor (LB) adjudicated the outcome.

11  
12  
13 228 From each study we extracted:

- 14  
15 229 • Year of publication  
16  
17 230 • Study design (cohort or case control)  
18  
19  
20 231 • Sample size of study  
21  
22  
23 232 • Age of participants  
24  
25 233 • Intervention or observation period  
26  
27  
28 234 • How the study defined wholegrain (verbatim)  
29  
30 235 • Level of wholegrain content in wholegrain foods  
31  
32  
33 236 • Disclosure of funding source (no disclosure, yes and there is a sponsor, the authors state  
34  
35 237 they received no funding for their work)  
36  
37  
38 238 • Name of the funders of the study (verbatim)  
39  
40 239 • Role of the funders (role of the sponsor not mentioned, sponsor not involved in study  
41  
42 240 design and analyses, sponsor involved, N/A)  
43  
44  
45 241 • Disclosure of author COI (no disclosure, yes, the authors state they had no conflicts of  
46  
47 242 interest to declare)  
48  
49  
50 243 • Authors COI statement (verbatim)  
51  
52  
53 244 • Outcomes assessed in the study (any cardiovascular disease death and/or event)  
54  
55

- 1  
2  
3 245 • The numerical results of the study (eg., OR, HR)  
4  
5  
6 246

7  
8 247 We stored all extracted data from the included studies in REDcap, a secure web-based  
9  
10 248 application for the collection and management of data.<sup>21</sup>  
11  
12  
13 249

14  
15 250 ***Classification of industry sponsorship and author conflicts of interest***  
16

17  
18 251 Sponsorship was categorized as 1) industry or 2) non-industry. We defined industry sponsored  
19  
20 252 studies as those declaring any sponsorship from the food industry, including if the study  
21  
22 253 received 'mixed funding' from the food industry, non-profit organizations or other industries  
23  
24 254 (i.e. pharmaceutical). Any study with an author with any disclosed financial tie to the food  
25  
26 255 industry was classified as having a conflict of interest (COI). Author COI were categorized as 1)  
27  
28 256 presence of a COI with the food industry or 2) no COI. Any studies that did not contain an  
29  
30 257 author COI disclosure statement were classified as no COI. We contacted the authors of one  
31  
32 258 paper<sup>22</sup> for clarification on their disclosure of funding source.  
33  
34  
35  
36  
37  
38  
39

40 260 **Assessment of risk of bias in included studies**  
41

42 261 We used an adapted version of the Cochrane Collaboration's 'Risk of Bias in Non-Randomized  
43  
44 262 Studies-of Interventions' (ROBINS-I)<sup>23</sup> tool to measure the risk of bias of included observational  
45  
46 263 studies. The tool assesses bias across seven domains. Each domain is assessed at a low,  
47  
48 264 moderate, serious or critical risk of bias, or no information. The domain rating with the highest  
49  
50 265 risk of bias determines the overall risk of bias rating for the study. For example, if a study is  
51  
52 266 rated as being at a serious risk of bias in one domain, the overall risk of bias rating is 'serious.'  
53  
54  
55  
56  
57  
58  
59  
60



## 267 **Analysis**

268 We report frequencies and percentages of study characteristics across all studies, and  
269 separately, by funding source. We visually depict the overall risk of bias rating and the ratings  
270 for each domain by study.

271  
272 We calculated risk ratios (and 95% confidence intervals) to quantify the association between  
273 food industry sponsorship and / or authors with COI with the food industry and favourable  
274 results, favourable conclusions and the overall study risk of bias rating. For the risk of bias rating  
275 analysis we dichotomised the overall risk of bias ratings as low (low or moderate) or high  
276 (serious or critical). We had planned to calculate a RR for level of concordance, however since in  
277 all studies there was concordance between the results and conclusions, we did not undertake  
278 this analysis.

279  
280 We used meta-analysis to examine whether food industry sponsorship and / or authors with COI  
281 with the food industry modified the magnitude of association between whole grains and  
282 cardiovascular disease outcomes. Specifically, we undertook a subgroup analysis within a  
283 random effects meta-analysis model that compared the pooled associations across subgroups  
284 defined by industry sponsorship. The associations were pooled using inverse variance weighting  
285 and DerSimonian and Laird's method of moments estimator was used to estimate between  
286 study heterogeneity. Separate meta-analyses were fitted for studies that had measured the  
287 association using hazard ratios and those that had used either risk ratios or odds ratios. Given  
288 cardiovascular events were rare, the odds ratios approximated risk ratios. We quantified

1  
2  
3 289 heterogeneity for subgroup differences using the  $I^2$  statistic<sup>24</sup> and tested for heterogeneity  
4  
5 290 using the Chi2 test. Review Manager 5.3 was used to analyse the data.<sup>25</sup>  
6  
7

8 291

## 11 292 **Protocol Registration**

14 293 The protocol is published in PROSPERO<sup>26</sup> ID CRD42017055841. (Supplementary file 2)

18 294

## 20 295 **Patient Involvement**

23 296 No patients were involved in the completion of this review.

25 297

## 28 298 **RESULTS**

### 30 299 **Search results**

32 300 We identified 6818 references for screening, from which, 22 studies met the inclusion criteria  
33  
34 301 (Figure 1). See Supplementary file 3 for 'List of excluded Studies' and reasons for exclusion.  
35  
36

37 302

40 303

### 42 304 **Characteristics of included Studies**

44 305 All studies were published between 1998 and 2015. Three of the studies were case control and  
45  
46 306 19 were cohort design. All studies contained a sponsorship disclosure. Five studies disclosed  
47  
48  
49 307 food industry sponsorship, but only one of these had a statement describing the role of the  
50  
51 308 sponsor. Five studies contained an author with a COI with the food industry. Ten studies did not  
52  
53  
54  
55

309 contain a disclosure statement. Nine studies contained either food industry sponsorship or had  
 310 an author with a COI.

311  
 312 A greater proportion of industry sponsored studies (67%) than non-industry sponsored studies  
 313 (31%) used a definition of wholegrain as greater than 25%, and most of these examined  
 314 breakfast cereals (Table 1). Industry sponsored studies were also more likely than non-industry  
 315 studies to focus on a specific food (44%) than total wholegrain intake (23%) (Table 1). Non-  
 316 industry sponsored studies (85%) had a greater proportion of studies with a serious or critical  
 317 risk of bias in classification of exposures than industry sponsored studies (56%). Other  
 318 characteristics were similarly distributed across industry vs. non-industry sponsored studies.  
 319 Details of each individual study are in Supplementary file 4.

321 **Table 1. Characteristics of the included studies by sponsorship and author COI**

| Characteristic                    | Category    | Funding Source, n (% <sup>1</sup> ) |                       |                                      |
|-----------------------------------|-------------|-------------------------------------|-----------------------|--------------------------------------|
|                                   |             | Total<br>N = 22                     | Industry/COI<br>N = 9 | Non-<br>Industry/No<br>COI<br>N = 13 |
| <b>Sex</b>                        | Male        | 4 (18)                              | 3 (33)                | 0 (0)                                |
|                                   | Female      | 6 (27)                              | 1 (11)                | 6 (46)                               |
|                                   | Both        | 12 (55)                             | 5 (56)                | 7 (54)                               |
| <b>Sample Size,<br/>quartiles</b> | <5000       | 6 (27)                              | 2 (22)                | 4 (31)                               |
|                                   | 5000-50,000 | 10 (45)                             | 4 (44)                | 5 (38)                               |
|                                   | >50,000     | 6 (27)                              | 3 (33)                | 4 (31)                               |
| <b>Length of<br/>Follow up</b>    | N/A*        | 3 (14)                              | 1 (11)                | 2 (15)                               |
|                                   | <10 years   | 4 (18)                              | 1 (11)                | 0 (0)                                |
|                                   | 10-15 years | 9 (41)                              | 4 (44)                | 8 (62)                               |
|                                   | >15         | 6 (27)                              | 3 (33)                | 3 (23)                               |

|                                |                                                                   |         |         |         |
|--------------------------------|-------------------------------------------------------------------|---------|---------|---------|
| <b>Percent Wholegrain</b>      | Not defined                                                       | 12 (55) | 3 (33)  | 9 (69)  |
|                                | >25%**                                                            | 10 (45) | 6 (67)  | 4 (31)  |
| <b>Type of Wholegrain</b>      | Only Wholegrain Intake                                            | 15 (68) | 5 (56)  | 10 (77) |
|                                | Individual Wholegrain Food***                                     | 7 (32)  | 4 (44)  | 3 (23)  |
| <b>Primary Outcome</b>         | Favourable to Wholegrains                                         | 16 (73) | 8 (89)  | 8 (62)  |
|                                | Unfavourable to Wholegrains                                       | 6 (27)  | 1 (11)  | 5 (38)  |
| <b>Conclusions</b>             | Favourable to Wholegrains                                         | 16 (73) | 8 (89)  | 8 (62)  |
|                                | Unfavourable to Wholegrains                                       | 6 (27)  | 1 (11)  | 5 (38)  |
| <b>Risk of Bias Assessment</b> |                                                                   |         |         |         |
|                                | Serious/Critical Bias due to confounding                          | 21 (95) | 9 (100) | 12 (92) |
|                                | Serious/Critical Bias in selection of participants into the study | 3 (14)  | 1 (11)  | 2 (15)  |
|                                | Serious/Critical Bias in classification of exposures              | 16 (73) | 5 (56)  | 11 (85) |
|                                | Serious/Critical Bias due to deviations from exposures            | 7 (32)  | 3 (33)  | 4 (31)  |
|                                | Serious/Critical Bias due to missing data                         | 0 (0)   | 0 (0)   | 0 (0)   |
|                                | Serious/Critical Bias in measurement of outcomes                  | 1 (5)   | 1 (11)  | 0 (0)   |
|                                | Serious/Critical Bias in selection of reported results            | 0 (0)   | 0 (0)   | 0 (0)   |
|                                | Serious/Critical overall risk of bias                             | 21 (95) | 9 (100) | 12 (92) |

<sup>1</sup> Percentages may not add to 100 due to rounding

\* Case control studies were not followed up

\*\*Any part of the wholegrain consumption was defined as >25%, including breakfast cereal

\*\*\*Individual foods included wholegrain cereal, breakfast cereal, bread & brown rice

323  
324  
325  
326  
327  
328

### 329 **Risk of bias in included studies**

330 One study<sup>27</sup> was assessed as having an overall moderate risk of bias, four as having a serious  
331 risk of bias and 17 as having critical risk of bias (Figure 2). The majority of studies had a critical  
332 risk of bias in the confounding domain. All but one study was assessed at a low risk of bias on  
333 the outcome measurement domain. For all domains, except classification of exposure, the risk  
334 of bias ratings were similarly distributed across industry vs. non-industry sponsored studies  
335 (Table 1).

### 338 **Favourable results - Statistical significance: Industry sponsored versus non-industry sponsored**

339 The risk of reporting favourable outcomes was 44% higher in studies with industry sponsorship  
340 and/or authors with a COI with the food industry RR= 1.44 (95% CI 0.88-2.35). However, the  
341 confidence interval was wide and included differences in risks that were unimportant or  
342 operating in the opposite direction as plausible estimates. When we compared only industry  
343 sponsored (n=5) and non-industry sponsored studies (n=17), the risk was smaller RR = 1.13 (95%  
344 CI 0.66-1.94).

### 346 **Favourable results - Effect size: Industry sponsored versus non-industry sponsored studies**

347 There was no important difference in the magnitude of RRs (measuring the association between  
348 wholegrains and cardiovascular disease outcomes) between studies with industry sponsorship  
349 and/or authors with a COI with the food industry RR = 0.77 (95% CI 0.58-1.01) and those studies  
350 with no industry sponsorship or author COI RR = 0.85 (95% CI 0.73-1.00) (subgroup test P=0.50,

1  
2  
3 351  $I^2 = 0\%$ ) (Figure 3). For studies that had measured the association using hazard ratios there was  
4  
5  
6 352 also no important difference found in the magnitude of HRs between studies with industry  
7  
8 353 sponsorship and/or authors with a COI with the food industry HR=0.82 (95% CI 0.76-0.88) and  
9  
10 354 studies with no industry sponsorship or author COI HR=0.86 (95% CI 0.81-0.91) (subgroup test  
11  
12  
13 355  $P=0.34$ ,  $I^2 = 0\%$ ) (Figure 4).

14  
15 356  
16  
17  
18 357 Our analysis comparing studies with industry sponsorship RR 0.63 (95% CI 0.28-1.39) and those  
19  
20 358 with no industry sponsorship RR 0.85 (95% CI 0.74-0.97) (subgroup test  $P=0.46$ ,  $I^2 = 0\%$ ), showed  
21  
22  
23 359 no important difference in the magnitude of RRs. This was again comparable between industry  
24  
25 360 sponsored HR 0.82 (95% CI 0.77-0.87) and non-industry sponsored studies HR 0.85 (95% CI 0.81-  
26  
27 361 0.90) (subgroup test  $P=0.29$ ),  $I^2=12.2\%$ ) that measured the association using hazard ratios.

28  
29  
30 362

31  
32 363

### 34 364 **Favourable conclusions: Industry sponsored versus non-industry sponsored**

35  
36  
37 365 As there was concordance between the results and conclusions of every included study, the  
38  
39  
40 366 same associations were found for conclusions as for the statistical significance of results. Studies  
41  
42 367 with industry sponsorship and/or authors with a COI with the food industry were more likely to  
43  
44  
45 368 have favourable conclusions compared to those with no industry sponsorship or author COI RR=  
46  
47 369 1.44 (95% CI 0.88-2.35), however the confidence interval was wide. When studies were  
48  
49  
50 370 compared only by industry sponsorship, the risk was again smaller RR = 1.13 (95% CI 0.66-1.94).

51  
52 371

### 53 54 372 **Risk of Bias Assessment**

1  
2  
3 373 Studies with industry sponsorship and/or authors with a COI with the food industry were less  
4  
5 374 likely (0/9) to have an overall low risk of bias rating compared to those studies with no industry  
6  
7  
8 375 sponsorship or author COI (1/13), RR = 0.47 (95% CI 0.02 -10.32), however there was large  
9  
10 376 uncertainty in the association.

11  
12  
13 37714  
15 378 **DISCUSSION**

16  
17 379 Although observational studies examining the effect of wholegrain consumption on  
18  
19  
20 380 cardiovascular disease outcomes that were sponsored by the food industry and / or had authors  
21  
22  
23 381 with a COI with the food industry more often had favourable results than research not tied to  
24  
25 382 the food industry, the difference was not statistically significant. We found no evidence of a  
26  
27  
28 383 difference in the magnitude of effect between industry sponsored and non-industry sponsored  
29  
30 384 studies. It is difficult to detect differences in effect size by sponsorship as many study design  
31  
32  
33 385 features, such as dose and duration of exposures, and specific cardiovascular disease outcomes,  
34  
35 386 vary across studies and may influence the effect size. In previous assessments of drug studies  
36  
37  
38 387 that have demonstrated that industry funded studies are more likely to have results that favour  
39  
40 388 the study sponsors, there was no statistically significant difference found in effect sizes between  
41  
42 389 industry and non-industry sponsored studies.<sup>11</sup>

43  
44  
45 390

46  
47 391 Although all the included studies had a sponsorship disclosure, almost half were missing  
48  
49 392 disclosures about author COI. Nondisclosed COIs in nutrition research are a concern.<sup>48</sup> Larger  
50  
51  
52 393 samples of industry funded studies and studies with disclosed author COI could make it possible  
53  
54 394 to establish the association of sponsorship with research outcomes.

1  
2  
3 395  
4  
5  
6 396 Studies that were sponsored by the food industry and / or had authors with a COI with the food  
7  
8 397 industry more often had favourable conclusions than studies with no industry ties, although  
9  
10 398 there was uncertainty in this relationship. There was absence of spin in the included studies as  
11  
12  
13 399 all the results agreed with the conclusions.  
14

15 400  
16  
17 401 The overall risk of bias in every study, other than one non-industry sponsored study<sup>27</sup>, was  
18  
19 402 classified as high (either serious or critical). The overall risk of bias rating was based on the  
20  
21 403 domain with the highest/worst risk of bias rating within each study, and most of the studies had  
22  
23 404 a risk of bias related to confounding. Across each domain, we found little difference in the risk  
24  
25 405 of bias between industry sponsored and non-industry sponsored studies.  
26  
27  
28  
29

30 406

### 31 32 407 **Strengths and limitations of this review**

33  
34  
35 408 Our review was registered in PROSPERO<sup>26</sup>. We conducted a comprehensive search and followed  
36  
37 409 explicit and well-defined inclusion and exclusion criteria for the included studies. Although our  
38  
39 410 sample was small, we searched several databases and reference lists of included studies.  
40  
41  
42 411 Authors of the studies for which we required clarification on funding source were also  
43  
44 412 contacted, but we did not attempt to contact the authors of studies lacking a COI disclosure  
45  
46 413 statement. Thus, we may be underestimating the number of articles that had authors with  
47  
48 414 conflicts of interest. Our assessment of risk of bias in the included studies was based on a tool  
49  
50 415 that is under development, but changes to the tool are unlikely to affect the risk of bias  
51  
52  
53 416 ratings.<sup>23</sup>  
54  
55



1  
2  
3 417  
4  
5  
6 418 **Agreements and disagreements with other studies or reviews**  
7  
8 419 The relationship that we identified between food industry sponsorship and authors with a COI  
9  
10 420 and favourable study outcomes towards the study sponsor has been previously demonstrated in  
11  
12 421 an assessment of a broad range of nutrition research.<sup>18</sup> Only one study has reported an  
13  
14 422 association of food industry funding with effect sizes.<sup>49</sup> Of studies examining the association  
15  
16 423 between soft drink consumption and adverse health outcomes, food industry sponsored studies  
17  
18 424 reported significantly smaller effects than non-food industry sponsored studies. Compared to  
19  
20 425 our study, this study examined studies with a homogeneous population of industry funders,  
21  
22 426 sugar sweetened beverage companies, which may have a more consistent influence on study  
23  
24 427 outcomes than the diverse pool of food industry sponsors in our study.

25  
26  
27  
28  
29  
30  
31 428 There was also no difference in the level of risk of bias between industry sponsored and non-  
32  
33 429 industry sponsored studies. This is consistent with previous assessments of pharmaceutical,  
34  
35 430 tobacco and nutrition research that has shown industry-sponsored studies are of equal or better  
36  
37 431 quality than non-industry-sponsored studies.<sup>11 18 50-52</sup>

38  
39  
40  
41 432  
42  
43 433 **Implications for clinicians, policy makers and future research**  
44  
45 434 The recent critiques to reform the methods used in the development of dietary guidelines have  
46  
47 435 proposed steps to improve the transparency of how evidence is evaluated and synthesized into  
48  
49 436 recommendations.<sup>12</sup> However, until the influence of industry sponsorship in primary nutrition  
50  
51 437 studies has been further explored and measured with larger samples of industry sponsored  
52  
53  
54  
55

1  
2  
3 438 studies, this bias may still be unaccounted for in dietary guidelines. Although there was  
4  
5  
6 439 uncertainty around the differences in the results and conclusions that we observed between  
7  
8 440 industry and non-industry studies, the differences are unlikely to be explained by  
9  
10 441 methodological risks of bias in these studies.  
11  
12

13 442  
14  
15 443 There are ways that study sponsorship can influence outcomes other than through the design of  
16  
17 444 research. Bias may also be introduced in the way industry sponsored studies code events and  
18  
19 445 analyse data,<sup>53 54</sup> through the selective reporting of study outcomes and through publication  
20  
21 446 bias.<sup>55</sup> It has been demonstrated in other areas of medical research that there is a greater  
22  
23 447 propensity to publish studies with statistically significant results.<sup>56</sup> Therefore, selective  
24  
25 448 publication of study results or studies in their entirety, may limit the availability of all relevant  
26  
27 449 nutrition data and can skew results that are used in dietary guideline development.<sup>57</sup>  
28  
29 450 Publication bias could be minimized with the introduction of study registries for nutrition  
30  
31 451 research, as has been established in pharmaceutical research.<sup>58</sup> The association of food  
32  
33 452 industry sponsorship with the reporting of nutrition research still needs to be assessed.  
34  
35  
36  
37  
38  
39

40 453  
41  
42 454 Almost half of the studies included in this review had authors that did not disclose if they had a  
43  
44 455 COI with the food industry or not. Compliance with COI disclosure policies is now well  
45  
46 456 documented across many domains of research.<sup>59-64</sup> Recent examinations of the levels of  
47  
48 457 disclosure in research assessing the effects of artificially sweetened beverages on weight  
49  
50 458 outcomes found similarly poor disclosure rates.<sup>50</sup> Several solutions have been proposed to  
51  
52 459 increase transparency and disclosure rates, including the use of different databases and  
53  
54  
55

1  
2  
3 460 additional resources to identify conflicted authors, and the introduction of mandatory  
4  
5 461 disclosure requirements in all journals, with the use of penalties for those who do not adhere to  
6  
7  
8 462 the stated policies.<sup>18 50</sup>  
9

10 463  
11  
12  
13 464 This research further strengthens calls for stricter policies relating to the disclosure and  
14  
15 465 management of conflicts of interest in nutrition research. These findings suggest, but do not  
16  
17  
18 466 establish, that the presence of food industry sponsorship or authors with a conflict of interest  
19  
20 467 with the food industry, may be associated with both the results and conclusions that favour  
21  
22  
23 468 industry sponsors.  
24

25 469  
26  
27  
28  
29  
30  
31  
32  
33  
34  
35  
36  
37  
38  
39  
40  
41  
42  
43  
44  
45  
46  
47  
48  
49  
50  
51  
52  
53  
54  
55  
56  
57  
58  
59  
60

1  
2  
3 470 **Figure 1. Study Flow Diagram**  
4

5  
6 471 **Figure 2. Risk of Bias of Included Studies**  
7

8 472 **Figure 3: Effect Size - Industry sponsored &/OR author COI versus non-industry sponsored &**  
9  
10 473 **no author COI studies, Risk Ratio**  
11

12  
13 474 **Figure 4: Effect Size - Industry sponsored &/OR author COI versus non-industry sponsored &**  
14  
15 475 **no author COI studies, Hazard Ratio**  
16

17  
18 476  
19  
20  
21  
22  
23  
24  
25  
26  
27  
28  
29  
30  
31  
32  
33  
34  
35  
36  
37  
38  
39  
40  
41  
42  
43  
44  
45  
46  
47  
48  
49  
50  
51  
52  
53  
54  
55  
56  
57  
58  
59  
60

477 **References**

- 478 1. National Academies of Sciences Engineering, and Medicine. Redesigning the process for establishing  
479 the dietary guidelines for Americans 2017 [Available from:  
480 [https://www.nap.edu/catalog/24883/redesigning-the-dietary-](https://www.nap.edu/catalog/24883/redesigning-the-process-for-establishing-the-dietary-guidelines-for-americans)  
481 [guidelines-for-americans](https://www.nap.edu/catalog/24883/redesigning-the-process-for-establishing-the-dietary-guidelines-for-americans) (accessed Nov 2017)].
- 482 2. National Academies of Sciences Engineering, and Medicine. Optimizing the process for establishing the  
483 Dietary Guidelines for Americans: the selection process 2017 [Available from:  
484 [https://www.nap.edu/catalog/24637/optimizing-the-dietary-](https://www.nap.edu/catalog/24637/optimizing-the-process-for-establishing-the-dietary-guidelines-for-americans)  
485 [guidelines-for-americans](https://www.nap.edu/catalog/24637/optimizing-the-process-for-establishing-the-dietary-guidelines-for-americans) (accessed Nov 2017)].
- 486 3. Bero L. Developing reliable dietary guidelines. *BMJ* 2017;**359**.
- 487 4. U.S. Department of Health and Human Services and U.S. Department of Agriculture. 2015 – 2020  
488 Dietary Guidelines for Americans. 8th Edition December 2015 [Available from:  
489 <https://health.gov/dietaryguidelines/2015/guidelines/>(accessed Dec 2017)].
- 490 5. National Health and Medical Research Council: Department of Health and Ageing. Australian Dietary  
491 Guidelines. Canberra, Commonwealth of Australia: NHMRC, 2013.
- 492 6. Public Health England. The Eatwell Guide 2017 [Available from:  
493 <https://www.gov.uk/government/publications/the-eatwell-guide>(accessed Dec 2017)].
- 494 7. Aune D, Keum N, Giovannucci E, et al. Whole grain consumption and risk of cardiovascular disease,  
495 cancer, and all cause and cause specific mortality: systematic review and dose-response meta-  
496 analysis of prospective studies. *BMJ* 2016;**353**.
- 497 8. Benisi-Kohansal S, Saneei P, Salehi-Marzijarani M, et al. Whole-Grain Intake and Mortality from All  
498 Causes, Cardiovascular Disease, and Cancer: A Systematic Review and Dose-Response Meta-  
499 Analysis of Prospective Cohort Studies. *Adv Nutr* 2016;**7**(6):1052-65.

- 1  
2  
3 500 9. Zhang B, Zhao Q, Guo W, et al. Association of whole grain intake with all-cause, cardiovascular, and  
4  
5 501 cancer mortality: a systematic review and dose-response meta-analysis from prospective cohort  
6  
7 502 studies. *Eur J Clin Nutr* 2017.
- 9  
10 503 10. Blake P, Durao S, Naude CE, et al. An analysis of methods used to synthesize evidence and grade  
11  
12 504 recommendations in food-based dietary guidelines. *Nutr Rev* 2018.
- 13  
14 505 11. Lundh A, Lexchin J, Mintzes B, et al. Industry sponsorship and research outcome. *Cochrane Database*  
15  
16 506 *Syst Rev* 2017;**2**:Mr000033.
- 17  
18 507 12. Huss A, Egger M, Hug K, et al. Source of funding and results of studies of health effects of mobile  
19  
20 508 phone use: systematic review of experimental studies. *Cienc Saude Colet* 2008;**13**(3):1005-12.
- 21  
22 509 13. Barnes DE, Bero LA. Why review articles on the health effects of passive smoking reach different  
23  
24 510 conclusions. *JAMA* 1998;**279**(19):1566-70.
- 25  
26 511 14. Lexchin J. Those who have the gold make the evidence: how the pharmaceutical industry biases the  
27  
28 512 outcomes of clinical trials of medications. *Sci Eng Ethics* 2012;**18**(2):247-61.
- 29  
30 513 15. Sismondo S. How pharmaceutical industry funding affects trial outcomes: causal structures and  
31  
32 514 responses. *Soc Sci Med* 2008;**66**(9):1909-14.
- 33  
34 515 16. Boutron I, Dutton S, Ravaud P, et al. Reporting and interpretation of randomized controlled trials  
35  
36 516 with statistically nonsignificant results for primary outcomes. *JAMA* 2010;**303**(20):2058-64.
- 37  
38 517 17. Odierna DH, Forsyth SR, White J, et al. The cycle of bias in health research: a framework and toolbox  
39  
40 518 for critical appraisal training. *Account Res* 2013;**20**(2):127-41.
- 41  
42 519 18. Chartres N, Fabbri A, Bero LA. Association of industry sponsorship with outcomes of nutrition studies:  
43  
44 520 A systematic review and meta-analysis. *JAMA Intern Med* 2016;**176**(12):1769-77.
- 45  
46 521 19. Diels J, Cunha M, Manaia C, et al. Association of financial or professional conflict of interest to  
47  
48 522 research outcomes on health risks or nutritional assessment studies of genetically modified  
49  
50 523 products. *Food Policy* 2011;**36**(2):197-203.

- 1  
2  
3 524 20. Dietitians Association of Australia. A review of the evidence to address targeted questions to inform  
4  
5 525 the revision of the Australian dietary guidelines 2009: Process Manual, 2011.  
6  
7 526 21. Harris PA, Taylor R, Thielke R, et al. Research Electronic Data Capture (REDCap) - A metadata-driven  
8  
9 527 methodology and workflow process for providing translational research informatics support. *J*  
10  
11 528 *Biomed Inform* 2009;**42**(2):377-81.  
12  
13  
14 529 22. Holmberg S, Thelin A, Stiernstrom EL. Food choices and coronary heart disease: a population based  
15  
16 530 cohort study of rural Swedish men with 12 years of follow-up. *Int J Environ Res Public Health*  
17  
18 531 2009;**6**(10):2626-38.  
19  
20  
21 532 23. Sterne JA, Hernán MA, Reeves BC, et al. ROBINS-I: a tool for assessing risk of bias in non-randomised  
22  
23 533 studies of interventions. *BMJ* 2016;**355**.  
24  
25 534 24. Higgins JPT, Thompson SG, Deeks JJ, et al. Measuring inconsistency in meta-analyses. *BMJ*  
26  
27 535 2003;**327**(7414):557-60.  
28  
29  
30 536 25. Review Manager Version 5.3 [program]. Copenhagen: The Nordic Cochrane Centre, The Cochrane  
31  
32 537 Collaboration, 2014.  
33  
34 538 26. National Institute for Health Research. International Prospective Register for Sytematic Reviews.  
35  
36 539 2015 [Available from: <http://www.crd.york.ac.uk/PROSPERO/>].  
37  
38  
39 540 27. Wu H, Flint AJ, Qi Q, et al. Association between dietary whole grain intake and risk of mortality: two  
40  
41 541 large prospective studies in US men and women. *JAMA Intern Med* 2015;**175**(3):373-84.  
42  
43 542 28. Djousse L, Gaziano JM. Breakfast cereals and risk of heart failure in the physicians' health study I.  
44  
45 543 *Arch Intern Med* 2007;**167**(19):2080-5.  
46  
47  
48 544 29. Huang T, Xu M, Lee A, et al. Consumption of whole grains and cereal fiber and total and cause-  
49  
50 545 specific mortality: prospective analysis of 367,442 individuals. *BMC Medicine* 2015;**13**(1):59.  
51  
52  
53  
54  
55

- 1  
2  
3 546 30. Jacobs Jr DR, Meyer KA, Kushi LH, et al. Whole-grain intake may reduce the risk of ischemic heart  
4  
5 547 disease death in postmenopausal women: The Iowa women's health study. *Am J Clin Nutr*  
6  
7 548 1998;**68**(2):248-57.
- 9  
10 549 31. Jacobs DR, Jr., Meyer KA, Kushi LH, et al. Is whole grain intake associated with reduced total and  
11  
12 550 cause-specific death rates in older women? The Iowa Women's Health Study. *Am J Public Health*  
13  
14 551 1999;**89**(3):322-9.
- 16 552 32. Jacobs DR, Jr., Meyer HE, Solvoll K. Reduced mortality among whole grain bread eaters in men and  
17  
18 553 women in the Norwegian County Study. *Eur J Clin Nutr* 2001;**55**(2):137-43.
- 20  
21 554 33. Jacobs Jr DR, Andersen LF, Blomhoff R. Whole-grain consumption is associated with a reduced risk of  
22  
23 555 noncardiovascular, noncancer death attributed to inflammatory diseases in the Iowa Women's  
24  
25 556 Health Study. *Am J Clin Nutr* 2007;**85**(6):1606-14.
- 27  
28 557 34. Jensen MK, Koh-Banerjee P, Hu FB, et al. Intakes of whole grains, bran, and germ and the risk of  
29  
30 558 coronary heart disease in men. *Am J Clin Nutr* 2004;**80**(6):1492-99.
- 32  
33 559 35. Li Y, Hruby A, Bernstein AM, et al. Saturated Fats Compared With Unsaturated Fats and Sources of  
34  
35 560 Carbohydrates in Relation to Risk of Coronary Heart Disease: A Prospective Cohort Study. *J Am*  
36  
37 561 *Coll Cardiol* 2015;**66**(14):1538-48.
- 38  
39 562 36. Liu S, Stampfer MJ, Hu FB, et al. Whole-grain consumption and risk of coronary heart disease: Results  
40  
41 563 from the Nurses' Health Study. *Am J Clin Nutr* 1999;**70**(3):412-19.
- 43  
44 564 37. Liu S, Manson JE, Stampfer MJ, et al. Whole grain consumption and risk of ischemic stroke in women:  
45  
46 565 A prospective study. *JAMA* 2000;**284**(12):1534-40.
- 47  
48 566 38. Liu S, Sesso HD, Manson JE, et al. Is intake of breakfast cereals related to total and cause-specific  
49  
50 567 mortality in men? *Am J Clin Nutr* 2003;**77**(3):594-9.
- 52  
53 568 39. Lockheart MS, Steffen LM, Rebnord HM, et al. Dietary patterns, food groups and myocardial  
54  
55 569 infarction: a case-control study. *Br J Nutr* 2007;**98**(2):380-7.



- 1  
2  
3 570 40. Mizrahi A, Knekt P, Montonen J, et al. Plant foods and the risk of cerebrovascular diseases: a  
4  
5 571 potential protection of fruit consumption. *Br J Nutr* 2009;**102**(7):1075-83.  
6  
7 572 41. Muraki I, Wu H, Imamura F, et al. Rice consumption and risk of cardiovascular disease: results from a  
8  
9 573 pooled analysis of 3 U.S. cohorts. *Am J Clin Nutr* 2015;**101**(1):164-72.  
10  
11 574 42. Nettleton JA, Steffen LM, Loehr LR, et al. Incident heart failure is associated with lower whole-grain  
12  
13 575 intake and greater high-fat dairy and egg intake in the Atherosclerosis Risk in Communities  
14  
15 576 (ARIC) study. *J Am Diet Assoc* 2008;**108**(11):1881-7.  
16  
17 577 43. Sahyoun NR, Jacques PF, Zhang XL, et al. Whole-grain intake is inversely associated with the  
18  
19 578 metabolic syndrome and mortality in older adults. *Am J Clin Nutr* 2006;**83**(1):124-31.  
20  
21 579 44. Sonestedt E, Hellstrand S, Schulz CA, et al. The association between carbohydrate-rich foods and risk  
22  
23 580 of cardiovascular disease is not modified by genetic susceptibility to dyslipidemia as determined  
24  
25 581 by 80 validated variants. *PLoS One* 2015;**10**(4):e0126104.  
26  
27 582 45. Steffen LM, Jacobs DR, Jr., Stevens J, et al. Associations of whole-grain, refined-grain, and fruit and  
28  
29 583 vegetable consumption with risks of all-cause mortality and incident coronary artery disease and  
30  
31 584 ischemic stroke: the Atherosclerosis Risk in Communities (ARIC) Study. *Am J Clin Nutr*  
32  
33 585 2003;**78**(3):383-90.  
34  
35 586 46. Tavani A, Bosetti C, Negri E, et al. Carbohydrates, dietary glycaemic load and glycaemic index, and  
36  
37 587 risk of acute myocardial infarction. *Heart* 2003;**89**(7):722-26.  
38  
39 588 47. Tavani A, Bertuzzi M, Gallus S, et al. Risk factors for non-fatal acute myocardial infarction in Italian  
40  
41 589 women. *J Prev Med* 2004;**39**(1):128-34.  
42  
43 590 48. Nestle M. Corporate Funding of Food and Nutrition Research: Science or Marketing? *JAMA Intern*  
44  
45 591 *Med* 2016;**176**(1):13-4.  
46  
47 592 49. Vartanian LR, Schwartz MB, Brownell KD. Effects of soft drink consumption on nutrition and health: a  
48  
49 593 systematic review and meta-analysis. *Am J Public Health* 2007;**97**(4):667-75.

- 1  
2  
3 594 50. Mandrioli D, Kearns CE, Bero LA. Relationship between Research Outcomes and Risk of Bias, Study  
4  
5 595 Sponsorship, and Author Financial Conflicts of Interest in Reviews of the Effects of Artificially  
6  
7 596 Sweetened Beverages on Weight Outcomes: A Systematic Review of Reviews. *PLoS One*  
8  
9 597 2016;**11**(9):e0162198.
- 11  
12 598 51. Barnes DE, Bero LA. Industry-funded research and conflict of interest: an analysis of research  
13  
14 599 sponsored by the tobacco industry through the Center for Indoor Air Research. *J Health Polit*  
15  
16 600 *Policy Law* 1996;**21**(3):515-42.
- 18  
19 601 52. Cho MK, Bero LA. The quality of drug studies published in symposium proceedings. *Ann Intern Med*  
20  
21 602 1996;**124**(5):485-9.
- 23  
24 603 53. Psaty BM, Prentice RL. Minimizing bias in randomized trials: the importance of blinding. *JAMA*  
25  
26 604 2010;**304**(7):793-4.
- 27  
28 605 54. Psaty BM, Kronmal RA. Reporting mortality findings in trials of rofecoxib for Alzheimer disease or  
29  
30 606 cognitive impairment: a case study based on documents from rofecoxib litigation. *JAMA*  
31  
32 607 2008;**299**(15):1813-7.
- 34  
35 608 55. Hart B, Lundh A, Bero L. Effect of reporting bias on meta-analyses of drug trials: reanalysis of meta-  
36  
37 609 analyses. *BMJ* 2012;**344**.
- 38  
39 610 56. Hopewell S, Loudon K, Clarke MJ, et al. Publication bias in clinical trials due to statistical significance  
40  
41 611 or direction of trial results. *Cochrane Database Syst Rev* 2009(1):Mr000006.
- 43  
44 612 57. Misakian AL, Bero LA. Publication bias and research on passive smoking: comparison of published and  
45  
46 613 unpublished studies. *JAMA* 1998;**280**(3):250-3.
- 47  
48 614 58. Dickersin K, Rennie D. The evolution of trial registries and their use to assess the clinical trial  
49  
50 615 enterprise. *JAMA* 2012;**307**(17):1861-4.
- 52  
53 616 59. Forsyth SR, Odierna DH, Krauth D, et al. Conflicts of interest and critiques of the use of systematic  
54  
55 617 reviews in policymaking: an analysis of opinion articles. *Syst Rev* 2014;**3**:122.

- 1  
2  
3 618 60. Ruff K. Scientific journals and conflict of interest disclosure: what progress has been made? *Environ*  
4  
5 619 *Health* 2015;**14**:45.  
6  
7 620 61. Resnik DB. Science and money: problems and solutions. *J Microbiol Biol Educ* 2014;**15**(2):159-61.  
8  
9 621 62. Roseman M, Milette K, Bero LA, et al. Reporting of conflicts of interest in meta-analyses of trials of  
10 622 pharmacological treatments. *JAMA* 2011;**305**(10):1008-17.  
11  
12 623 63. Bero L. Addressing bias and conflict of interest among biomedical researchers. *JAMA*  
13 624 2017;**317**(17):1723-24.  
14  
15 625 64. Grundy Q, Dunn AG, Bourgeois FT, et al. Prevalence of disclosed conflicts of interest in biomedical  
16 626 research and associations with journal impact factors and altmetric scores. *JAMA*  
17 627 2018;**319**(4):408-09.  
18  
19  
20  
21  
22  
23  
24  
25  
26  
27  
28  
29  
30 629

1  
2  
3 630 **Contributors:** NC, AF, SMc, MA-F and LB designed and wrote the review protocol. NC wrote the  
4  
5  
6 631 search strategy and undertook the literature search. NC, SMc and JT conducted the title and  
7  
8 632 abstract screening and full article screening for final study inclusion. NC, SMc and JT conducted  
9  
10 633 data collection and cleaning, LB supervised. NC and JMc undertook all data analysis. LB advised  
11  
12 634 on methods, statistical analyses, and interpretation of findings. All authors contributed to the  
13  
14  
15 635 final manuscript. NC and LB are guarantors.

16  
17  
18 636 **Funding:** This work was funded by National Health and Medical Research Council Grant  
19  
20  
21 637 #APP1139997. Nicholas Chartres is a recipient of the James Millner PhD Scholarship in Pharmacy  
22  
23 638 from the University of Sydney. Sally McDonald is a scholarship recipient (Charles Perkins Centre  
24  
25 639 summer scholarship) from the University of Sydney. Jessica Turton is a scholarship recipient  
26  
27  
28 640 (Charles Perkins Centre summer scholarship) from the University of Sydney.

29  
30  
31 641 **Competing interests:** All authors have completed the ICMJE uniform disclosure form at  
32  
33 642 [http://www.icmje.org/coi\\_disclosure.pdf](http://www.icmje.org/coi_disclosure.pdf). No support was received from any organisation for  
34  
35 643 the submitted work. The authors have no financial relationships with any organisations that  
36  
37 644 might have an interest in the submitted work in the previous three years. The authors report no  
38  
39 645 other relationships or activities that could appear to have influenced the submitted work.  
40  
41  
42  
43

44 646 **Ethical Approval:** Not required

45  
46  
47  
48 647 **Transparency declaration:** The authors affirm that this manuscript is a honest, accurate, and  
49  
50 648 transparent account of the study being reported, that no important aspects of the study have  
51  
52 649 been omitted and that any discrepancies from the study as planned have been explained.  
53  
54  
55

1  
2  
3 650 The Corresponding Author has the right to grant on behalf of all authors and does grant on  
4  
5  
6 651 behalf of all authors, a worldwide licence to the Publishers and its licensees in perpetuity, in all  
7  
8 652 forms, formats and media (whether known now or created in the future), to i) publish,  
9  
10 653 reproduce, distribute, display and store the Contribution, ii) translate the Contribution into  
11  
12 654 other languages, create adaptations, reprints, include within collections and create summaries,  
13  
14 655 extracts and/or, abstracts of the Contribution, iii) create any other derivative work(s) based on  
15  
16 656 the Contribution, iv) to exploit all subsidiary rights in the Contribution, v) the inclusion of  
17  
18 657 electronic links from the Contribution to third party material where-ever it may be located; and,  
19  
20  
21  
22 658 vi) licence any third party to do any or all of the above.

23  
24  
25  
26 659 **Data Sharing:** Available from The University of Sydney data repository. DOI to be determined.  
27  
28  
29  
30  
31  
32  
33  
34  
35  
36  
37  
38  
39  
40  
41  
42  
43  
44  
45  
46  
47  
48  
49  
50  
51  
52  
53  
54  
55

Figure 1. Study Flow Diagram

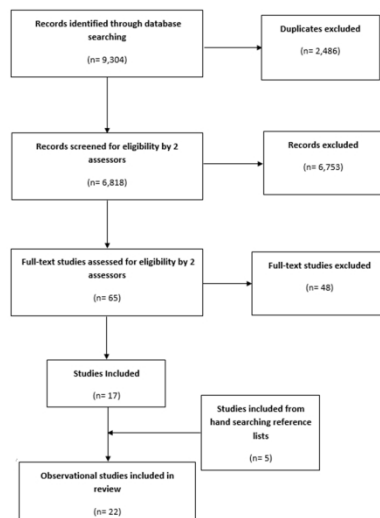

Figure 1. Study Flow Diagram

338x190mm (300 x 300 DPI)

1  
2  
3  
4  
5  
6  
7  
8  
9  
10  
11  
12  
13  
14  
15  
16  
17  
18  
19  
20  
21  
22  
23  
24  
25  
26  
27  
28  
29  
30  
31  
32  
33  
34  
35  
36  
37  
38  
39  
40  
41  
42  
43  
44  
45  
46  
47  
48  
49  
50  
51  
52  
53  
54  
55  
56  
57  
58  
59  
60

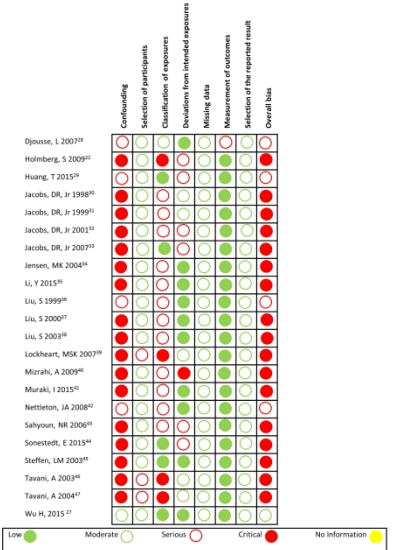

Figure 2. Risk of Bias Table  
338x190mm (300 x 300 DPI)

Figure 3: Effect Size - Industry Sponsored &/OR Author COI versus Non-Industry Sponsored & No Author COI, RR

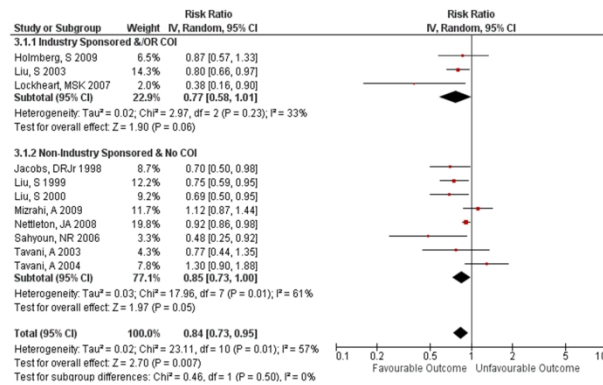

Figure 3. Effect Size - Industry sponsored &/OR author COI versus non-industry sponsored & no author COI studies, Risk Ratio

338x190mm (300 x 300 DPI)



Figure 4: Effect Size - Industry Sponsored &/OR Author COI versus Non-Industry Sponsored & No Author COI, HR

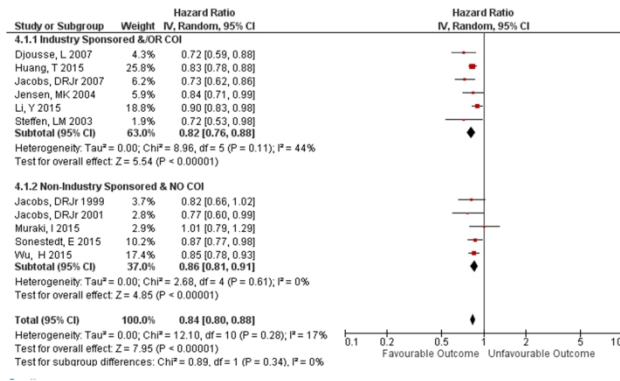

Figure 4: Effect Size - Industry sponsored &/OR author COI versus non-industry sponsored & no author COI studies, Hazard Ratio

338x190mm (300 x 300 DPI)

1  
2  
3 **1 Supplementary File 1: Search Strategy**  
4

5  
6 2 OVID Medline: wholegrain & CVD  
7

8  
9 3

10  
11 4 1. Randomized controlled trial\*.sh.  
12

13  
14 5 2. experimental design.tw.  
15

16  
17 6 3. intervention\*.tw.  
18

19  
20 7 4. (RCT\* or rct\*).tw.  
21

22  
23 8 5. random\* control\* trial\*.tw.  
24

25  
26 9 6. clinical trial\*.sh.  
27

28  
29 10 7. field trial\*.tw.  
30

31  
32 11 8. community trial\*.tw.  
33

34  
35 12 9. controlled clinical trial\*.tw.  
36

37  
38 13 10. pragmatic trial\*.tw.  
39

40  
41 14 11. observational study.sh.  
42

43  
44 15 12. cohort study.tw.  
45

46  
47 16 13. prospective cohort\*.tw.  
48

49  
50 17 14. retrospective cohort\*.tw.  
51

52  
53 18 15. case control\*.sh.  
54

55  
56 19 16. ecological study.tw.  
57

58  
59 20 17. time series analys?s.tw.  
60

21 18. before-after study.tw.

22 19. pre-post study.tw.

- 1  
2  
3 23 20. follow up stud\*.sh.  
4  
5  
6 24 21. comparative stud\*.sh.  
7  
8 25 22. evaluation stud\*.sh.  
9  
10  
11 26 23. 1 or 2 or 3 or 4 or 5 or 6 or 7 or 8 or 9 or 10 or 11 or 12 or 13 or 14 or 15 or 16 or 17 or 18 or 19 or 20  
12 27 or 21 or 22  
13  
14  
15 28 24. Edible Grain/ae, me [Adverse Effects, Metabolism]  
16  
17 29 25. grain\*.tw.  
18  
19  
20 30 26. Dietary Carbohydrates/ or Edible Grain/ or Bread/ or Dietary Fiber/  
21  
22 31 27. whole grain\*.tw.  
23  
24  
25 32 28. partially processed grains.tw.  
26  
27 33 29. whole wheat.tw.  
28  
29  
30 34 30. wholemeal.tw.  
31  
32 35 31. rice\*.tw.  
33  
34  
35 36 32. oat\*.tw.  
36  
37 37 33. barley\*.tw.  
38  
39  
40 38 34. wheat\*.tw.  
41  
42 39 35. Amaranthus/ae, me [Adverse Effects, Metabolism]  
43  
44  
45 40 36. amaranth.tw.  
46  
47 41 37. Millets/me [Metabolism]  
48  
49  
50 42 38. millet\*.tw.  
51  
52 43 39. Sorghum/me [Metabolism]  
53  
54  
55 44 40. sorghum\*.tw.  
56  
57  
58  
59  
60

- 1  
2  
3 45 41. maize\*.tw.  
4  
5  
6 46 42. spelt\*.tw.  
7  
8 47 43. buckwheat\*.tw.  
9  
10  
11 48 44. Triticale/me [Metabolism]  
12  
13 49 45. triticale\*.tw.  
14  
15  
16 50 46. fonio\*.tw.  
17  
18 51 47. emmer.tw.  
19  
20  
21 52 48. einkorn\*.tw.  
22  
23 53 49. kamut\*.tw.  
24  
25  
26 54 50. canary seed\*.tw.  
27  
28 55 51. Bread/ae, an, me [Adverse Effects, Analysis, Metabolism]  
29  
30  
31 56 52. bread\*.tw.  
32  
33 57 53. breakfast cereal\*.tw.  
34  
35  
36 58 54. pasta\*.tw.  
37  
38 59 55. noodle\*.tw.  
39  
40  
41 60 56. Flour/ae, an, st [Adverse Effects, Analysis, Standards]  
42  
43 61 57. flour\*.tw.  
44  
45  
46 62 58. polenta\*.tw.  
47  
48 63 59. semolina\*.tw.  
49  
50  
51 64 60. bran.tw.  
52  
53 65 61. corn.tw.  
54  
55  
56 66 62. wheat germ\*.tw.  
57  
58  
59  
60

- 1  
2  
3 67 63. corn cake\*.tw.  
4  
5 68 64. scone\*.tw.  
6  
7  
8 69 65. couscous.tw.  
9  
10  
11 70 66. crumpet\*.tw.  
12  
13 71 67. dietary fiber.tw.  
14  
15 72 68. dietary carbohydrate\*.tw.  
16  
17  
18 73 69. glycemic index.tw.  
19  
20  
21 74 70. 24 or 25 or 26 or 27 or 28 or 29 or 30 or 31 or 32 or 33 or 34 or 35 or 36 or 37 or 38 or 39 or 40 or 41  
22 75 or 42 or 43 or 44 or 45 or 46 or 47 or 48 or 49 or 50 or 51 or 52 or 53 or 54 or 55 or 56 or 57 or 58 or 59  
23 76 or 60 or 61 or 62 or 64 or 65 or 66 or 67 or 68 or 69  
24  
25  
26 77 71. Coronary Disease/ or Cardiovascular Diseases/ or Hypertension/ or Atherosclerosis/  
27  
28  
29 78 72. cardiovascular disease\*.tw.  
30  
31 79 73. coronary\*.tw.  
32  
33  
34 80 74. heart\*.tw.  
35  
36 81 75. cardia\*.tw.  
37  
38  
39 82 76. myocard\*.tw.  
40  
41 83 77. isch?em\*.tw.  
42  
43  
44 84 78. angina\*.tw.  
45  
46 85 79. ventric\*.tw.  
47  
48  
49 86 80. tachycardi\*.tw.  
50  
51 87 81. pericard\*.tw.  
52  
53  
54 88 82. endocardi\*.tw.  
55  
56  
57  
58  
59  
60

- 1  
2  
3 89 83. atrial fibrillat\*.tw.  
4  
5 90 84. arrhythmi\*.tw.  
6  
7  
8 91 85. athero\*.tw.  
9  
10 92 86. arterio\*.tw.  
11  
12  
13 93 87. HDL.tw.  
14  
15 94 88. LDL.tw.  
16  
17  
18 95 89. VLDL.tw.  
19  
20 96 90. lipid\*.tw.  
21  
22  
23 97 91. lipoprotein\*.tw.  
24  
25  
26 98 92. triacylglycerol\*.tw.  
27  
28 99 93. hyperlipid\*.tw.  
29  
30 100 94. hypercholesterol\*.tw.  
31  
32  
33 101 95. hypercholester?emia\*.tw.  
34  
35  
36 102 96. hypertriglycerid?emia\*.tw.  
37  
38 103 97. Cholesterol/  
39  
40  
41 104 98. Stroke/  
42  
43 105 99. Cerebrovascular Disorders/  
44  
45  
46 106 100. vascular accident\*.tw.  
47  
48  
49 107 101. TIA.tw.  
50  
51 108 102. Thrombosis/  
52  
53 109 103. thrombosis.tw.  
54  
55  
56 110 104. Embolism/ or Pulmonary Embolism/  
57  
58  
59  
60

- 1  
2  
3 111 105. apoplexy.tw.  
4  
5  
6 112 106. (brain adj2 accident\*).tw.  
7  
8 113 107. ((brain\* or cerebral or lacunar) adj2 infarct\*).tw.  
9  
10  
11 114 108. Blood Pressure/ or Hypertension/  
12  
13 115 109. systolic blood pressure.tw.  
14  
15  
16 116 110. diastolic blood pressure.tw.  
17  
18 117 111. Peripheral Vascular Diseases/ or Peripheral Arterial Disease/  
19  
20  
21 118 112. (coronar\$ adj5 (bypas\$ or graft\$ or disease\$ or event\$)).tw.  
22  
23 119 113. (cerebrovasc\$ or cardiovasc\$ or mortal\$ or angina\$ or stroke or strokes).tw.  
24  
25  
26 120 114. (myocardi\$ adj5 (infarct\$ or revascular\$ or ischaemi\$ or ischemi\$)).tw.  
27  
28 121 115. (morbid\$ adj5 (heart\$ or coronar\$ or ischaem\$ or ischem\$ or myocard\$)).tw.  
29  
30  
31 122 116. (vascular\$ adj5 (peripheral\$ or disease\$ or complication\$)).tw.  
32  
33 123 117. (heart\$ adj5 (disease\$ or attack\$ or bypass\$)).tw.  
34  
35  
36 124 118. Mortality/  
37  
38 125 119. mortality.tw.  
39  
40  
41 126 120. Diabetes Mellitus, Type 2/  
42  
43 127 121. Hyperglycemia/  
44  
45  
46 128 122. hyperglycemi\*.tw.  
47  
48 129 123. (glucose adj2 intoleran\*).tw.  
49  
50  
51 130 124. Insulin Resistance/  
52  
53 131 125. (metabolic adj3 syndrome adj3 x).tw.  
54  
55  
56 132 126. metabolic cardiovascular syndrome.tw.  
57  
58  
59  
60

1  
2  
3 133 127. dysmetabolic syndrome x.tw.  
4

5  
6 134 128. HbA1c.tw.  
7

8 135 129. (glyc?emic adj3 control).tw.  
9

10 136 130. 71 or 72 or 73 or 74 or 75 or 76 or 77 or 78 or 79 or 80 or 81 or 82 or 83 or 84 or 85 or 86 or 87 or

11 137 88 or 89 or 90 or 91 or 92 or 93 or 94 or 95 or 96 or 97 or 98 or 99 or 100 or 101 or 102 or 103 or 104 or

12 138 105 or 106 or 107 or 108 or 109 or 110 or 111 or 112 or 113 or 114 or 115 or 116 or 117 or 118 or 119 or

13 139 120 or 121 or 122 or 123 or 124 or 125 or 126 or 127 or 128 or 129  
14  
15  
16  
17

18 140 131. 23 and 70 and 130  
19

20 141 132. limit 131 to (humans and yr="1997 -Current")  
21  
22  
23  
24  
25  
26  
27  
28  
29  
30  
31  
32  
33  
34  
35  
36  
37  
38  
39  
40  
41  
42  
43  
44  
45  
46  
47  
48  
49  
50  
51  
52  
53  
54  
55  
56  
57  
58  
59  
60



## PROSPERO International prospective register of systematic reviews

### Review title and timescale

- 1 Review title  
Give the working title of the review. This must be in English. Ideally it should state succinctly the interventions or exposures being reviewed and the associated health or social problem being addressed in the review.  
**The association of industry sponsorship with outcomes of studies examining the effect of intake of wholegrain foods with cardiovascular disease and mortality: protocol**
- 2 Original language title  
For reviews in languages other than English, this field should be used to enter the title in the language of the review. This will be displayed together with the English language title.
- 3 Anticipated or actual start date  
Give the date when the systematic review commenced, or is expected to commence.  
**28/11/2016**
- 4 Anticipated completion date  
Give the date by which the review is expected to be completed.  
**31/05/2017**
- 5 Stage of review at time of this submission  
Indicate the stage of progress of the review by ticking the relevant boxes. Reviews that have progressed beyond the point of completing data extraction at the time of initial registration are not eligible for inclusion in PROSPERO. This field should be updated when any amendments are made to a published record.
- The review has not yet started
- | Review stage                                                    | Started | Completed |
|-----------------------------------------------------------------|---------|-----------|
| Preliminary searches                                            | No      | Yes       |
| Piloting of the study selection process                         | No      | Yes       |
| Formal screening of search results against eligibility criteria | No      | Yes       |
| Data extraction                                                 | Yes     | No        |
| Risk of bias (quality) assessment                               | Yes     | No        |
| Data analysis                                                   | No      | No        |
- Provide any other relevant information about the stage of the review here.

### Review team details

- 6 Named contact  
The named contact acts as the guarantor for the accuracy of the information presented in the register record.  
**Mr Chartres**
- 7 Named contact email  
Enter the electronic mail address of the named contact.  
**ngar0960@uni.sydney.edu.au**
- 8 Named contact address  
Enter the full postal address for the named contact.  
**THE UNIVERSITY OF SYDNEY D17, The Hub, 6th floor, Charles Perkins Centre| The University of Sydney | NSW | 2006**
- 9 Named contact phone number  
Enter the telephone number for the named contact, including international dialing code.  
**02 8627 4328**
- 10 Organisational affiliation of the review  
Full title of the organisational affiliations for this review, and website address if available. This field may be completed

as 'None' if the review is not affiliated to any organisation.

THE UNIVERSITY OF SYDNEY

Website address:

sydney.edu.au

#### 11 Review team members and their organisational affiliations

Give the title, first name and last name of all members of the team working directly on the review. Give the organisational affiliations of each member of the review team.

| Title     | First name | Last name        | Affiliation                                                               |
|-----------|------------|------------------|---------------------------------------------------------------------------|
| Mr        | Nicholas   | Chartres         | The Hub, 6th floor, Charles Perkins Centre, The University of Sydney      |
| Dr        | Alice      | Fabbri           | The Hub, 6th floor, Charles Perkins Centre, The University of Sydney      |
| Miss      | Sally      | McDonald         | The Hub, 6th floor, Charles Perkins Centre, The University of Sydney      |
| Miss      | Jessica    | Turton           | The Hub, 6th floor, Charles Perkins Centre, The University of Sydney      |
| Professor | Margaret   | Allman-Farinelli | Charles Perkins Centre, The University of Sydney                          |
| Professor | Lisa       | Bero             | D17, The Hub, 6th floor, Charles Perkins Centre, The University of Sydney |

#### 12 Funding sources/sponsors

Give details of the individuals, organizations, groups or other legal entities who take responsibility for initiating, managing, sponsoring and/or financing the review. Any unique identification numbers assigned to the review by the individuals or bodies listed should be included.

Nicholas Chartres is a scholarship recipient (James Milner PhD scholarship in Pharmacy) from the University of Sydney. Alice Fabbri is a PhD student. She is recipient of a scholarship from the Italian Ministry of Education, Universities and Research. Sally McDonald is a scholarship recipient (Charles Perkins Centre summer scholarship) from the University of Sydney. Jessica Turton is a scholarship recipient (Charles Perkins Centre summer scholarship) from the University of Sydney.

#### 13 Conflicts of interest

List any conditions that could lead to actual or perceived undue influence on judgements concerning the main topic investigated in the review.

Are there any actual or potential conflicts of interest?

None known

#### 14 Collaborators

Give the name, affiliation and role of any individuals or organisations who are working on the review but who are not listed as review team members.

| Title | First name | Last name | Organisation details |
|-------|------------|-----------|----------------------|
|-------|------------|-----------|----------------------|

### Review methods

#### 15 Review question(s)

State the question(s) to be addressed / review objectives. Please complete a separate box for each question.

The objective of this study is to determine if the presence of food industry sponsorship in primary nutrition studies examining the association of wholegrain foods with cardiovascular outcomes is associated with effect sizes, statistical significance of results and/ or conclusions that are favorable to the sponsor.

We will also determine whether industry sponsored primary nutrition studies assessing the association of wholegrain foods with cardiovascular outcomes differ in their risk of bias compared with studies with no or other sources of sponsorship.

#### 16 Searches

Give details of the sources to be searched, and any restrictions (e.g. language or publication period). The full search strategy is not required, but may be supplied as a link or attachment.

We will search the following databases from 1997-2016: Ovid MEDLINE; CINAHL; PubMed; PreMEDLINE; Cochrane Library; PsycINFO; Science Direct; and ERIC.

17 URL to search strategy

If you have one, give the link to your search strategy here. Alternatively you can e-mail this to PROSPERO and we will store and link to it.

I give permission for this file to be made publicly available

No

18 Condition or domain being studied

Give a short description of the disease, condition or healthcare domain being studied. This could include health and wellbeing outcomes.

public health - nutrition

19 Participants/population

Give summary criteria for the participants or populations being studied by the review. The preferred format includes details of both inclusion and exclusion criteria.

studies of adults and / or children were eligible for inclusion Inclusion Criteria • The study quantitatively measure the effects of wholegrain consumption in humans • The study involves or considers research with healthy children and/or adults with BMI 25% wholegrain, which may be whole, partially processed, ground or milled grain products in which every part of the grain is present in proportions that represent those present in the whole grain • The study has an outcome measure related to cardiovascular disease. • The study evaluates clinical outcomes (e.g. risk ratio/hazard ratio/odds ratio (RR/HR/OR) of cardiovascular mortality, nonfatal heart attack, stroke, etc.) and/or the surrogate outcomes of Blood Pressure (mmHg), LDL cholesterol, or HbA1c. • If the study examines mixed interventions (e.g. nutritional and educational) we will include them only if data related to wholegrain consumption are reported separately or can be obtained from the authors • In case of multiple reports from the same study, we will use the most complete and/or recently reported data Exclusion Criteria • Cross sectional studies, reviews and meta-analysis, commentaries. • The study examines dietary patterns only (e.g. the "Mediterranean diet") • The study examines nutrients in an altered state (i.e. cereal fibre supplements or bran fortification) • The study examines total grain intake without differentiating between wholegrains and refined grains, or includes significant refined grain products in the wholegrain category. • The study examines only refined grain products, including cereal products containing high added fat or sugar (e.g. cakes, biscuits, pastries). • The study examines intake of supplemented or enriched foods (e.g. with the addition of bran) and not intake of wholegrain foods.

21 Comparator(s)/control

Where relevant, give details of the alternatives against which the main subject/topic of the review will be compared (e.g. another intervention or a non-exposed control group).

Wholegrain vs Wholegrain (different doses) Wholegrain vs Wholegrain (different grains) Wholegrain vs no Wholegrain Wholegrain vs Refined grain Wholegrain vs Other food Other (mixed intervention)

22 Types of study to be included

Give details of the study designs to be included in the review. If there are no restrictions on the types of study design eligible for inclusion, this should be stated.

Inclusion: RCT/ cluster RCT Controlled Trial/ pseudo-randomized Cohort Case-control Pre/Post Exclusion: Cross sectional studies reviews and meta-analysis commentaries.

23 Context

Give summary details of the setting and other relevant characteristics which help define the inclusion or exclusion criteria.

24 Primary outcome(s)

Give the most important outcomes.

a. Primary Outcome 1 and 2 (Results and effect size) - Statistical significance of results - Effect size of outcomes b. Primary Outcome 3 (Conclusions) For this study, we will use clinical outcomes only for observational studies and both clinical and surrogate outcomes for interventional studies. We define as clinically relevant cardiovascular outcomes as mortality related to specific cardiovascular events, and/or number of cardiovascular events (including myocardial infarction, stroke). We define relevant surrogate outcomes as blood pressure (mmHg), lipid marker (LDL cholesterol),

or HbA1c. Our rationale for including only these outcomes is that these were used to measure cardiovascular disease risk factors in the development of the Australian Dietary Guidelines We will define favorable results and conclusions as those showing a statistically significant association of wholegrain consumption and decreased cardiovascular disease risk. For each study we will record the stated hypothesis for the study, including the stated outcomes to be measured. If primary outcomes are not stated we will take mortality (related to specific cardiovascular events) as the primary outcome to be measured. In the absence of mortality outcomes, we will take number of cardiovascular events (including non-fatal myocardial infarction and stroke) as the primary outcome. In the absence of these, blood pressure, LDL cholesterol, or HbA1C as risk factors will be used as the primary outcome.

Give information on timing and effect measures, as appropriate.  
variable

## 25 Secondary outcomes

List any additional outcomes that will be addressed. If there are no secondary outcomes enter None.

Secondary Outcome 1 (Methodological risk of bias) Secondary Outcome 2 (Concordance between results and conclusions) Risk of Bias Assessment We will use the Cochrane Risk of Bias tool for randomised studies to measure the methodological quality of randomized controlled trials. The tool assesses bias across 7 domains and each of these will be reported separately. To measure methodological quality in observational studies we will use the ROBINS-E tool for non-randomized studies (ROBINS-E), which also measures bias across 7 domains. We will classify concordance between study results and conclusions as 'yes' if the authors' conclusions are supported by all outcomes. This will include the reporting of all significant and non-significant results. Otherwise, concordance will be classified as 'no'.

Give information on timing and effect measures, as appropriate.  
variable

26

**Supplementary File 3: List of Excluded Studies**

| Author: Year                             | Title                                                                                                                                                                     | Reason For Exclusion                                                   |
|------------------------------------------|---------------------------------------------------------------------------------------------------------------------------------------------------------------------------|------------------------------------------------------------------------|
| Ahn, Y 2013 <sup>1</sup>                 | Rice-eating pattern and the risk of metabolic syndrome especially waist circumference in Korean Genome and Epidemiology Study (KoGES)                                     | No wholegrain rice group on its own. Only mixed meals                  |
| Alonso, A 2006 <sup>2</sup>              | Vegetable protein and fiber from cereal are inversely associated with the risk of hypertension in a Spanish cohort                                                        | Fiber from cereals was not exclusively from wholegrain products        |
| Altorf-van der Kuil, W 2012 <sup>3</sup> | Sources of dietary protein and risk of hypertension in a general Dutch population                                                                                         | The study does not specify grain source of protein is from wholegrains |
| Appleby, PN 1999 <sup>4</sup>            | The Oxford Vegetarian Study: an overview                                                                                                                                  | No analysis of wholegrains, only dietary fiber                         |
| Assmann, KE 2015 <sup>5</sup>            | A Healthy Dietary Pattern at Midlife, Combined with a Regulated Energy Intake, Is Related to Increased Odds for Healthy Aging                                             | Dietary pattern assessment only. No separate analysis of wholegrains   |
| Bae, JM 2002 <sup>6</sup>                | A nested case-control study on the high-normal blood pressure as a risk factor of hypertension in Korean middle-aged men                                                  | No measurement of wholegrain intake, only total dietary fiber          |
| Bazzano, LA 2003 <sup>7</sup>            | Dietary fiber intake and reduced risk of coronary heart disease in US men and women: the National Health and Nutrition Examination Survey I Epidemiologic Follow-up Study | No separate analysis of dietary fiber from wholegrains                 |
| Bernstein, AM 2011 <sup>8</sup>          | Cereal fiber and coronary heart disease: a comparison of modeling approaches for repeated dietary measurements, intermediate outcomes, and long follow-up                 | No separate analysis of cereal fiber from wholegrains                  |
| Bertoia, ML 2014 <sup>9</sup>            | Mediterranean and Dietary Approaches to Stop Hypertension dietary patterns and risk of sudden cardiac death in postmenopausal women                                       | Dietary pattern assessment only. No separate analysis of wholegrains   |

|                                        |                                                                                                                                                                             |                                                                            |
|----------------------------------------|-----------------------------------------------------------------------------------------------------------------------------------------------------------------------------|----------------------------------------------------------------------------|
|                                        |                                                                                                                                                                             |                                                                            |
| Bingham, CM<br>2012 <sup>10</sup>      | Food choices and health during military service: increases in sugar- and fibre-containing foods and changes in anthropometric and clinical risk factors                     | Cross sectional analysis only of diet. No measurement of whole grain foods |
| Buil-Cosiales, P<br>2014 <sup>11</sup> | Fiber intake and all-cause mortality in the Prevención con Dieta Mediterránea (PREDIMED) study                                                                              | Participants did not meet the inclusion criteria                           |
| Burger, KN<br>2011 <sup>12</sup>       | Dietary glycemic load and glycemic index and risk of coronary heart disease and stroke in Dutch men and women: the EPIC-MORGEN study                                        | No measurement of wholegrain intake                                        |
| Burke, V<br>2005 <sup>13</sup>         | Predictors of body mass index and associations with cardiovascular risk factors in Australian children: a prospective cohort study                                          | No measurement of wholegrain intake                                        |
| Chuang, S-C<br>2012 <sup>14</sup>      | Fiber intake and total and cause-specific mortality in the European Prospective Investigation into Cancer and Nutrition cohort                                              | No separate analysis of cereal fiber from wholegrains                      |
| Crowe, FL<br>2012 <sup>15</sup>        | Dietary fibre intake and ischaemic heart disease mortality: the European Prospective Investigation into Cancer and Nutrition-Heart study                                    | No separate analysis of cereal fiber from wholegrains                      |
| Djoussé, L<br>2009 <sup>16</sup>       | Relation between modifiable lifestyle factors and lifetime risk of heart failure                                                                                            | No separate analysis of cereal from wholegrains                            |
| Eshak, ES<br>2014 <sup>17</sup>        | Rice consumption is not associated with risk of cardiovascular disease morbidity or mortality in Japanese men and women: a large population-based, prospective cohort study | No separate analysis of brown/unrefined rice                               |
| Flint, AJ<br>2009 <sup>18</sup>        | Whole grains and incident hypertension in men                                                                                                                               | No clinical CVD outcome measured                                           |



|                                     |                                                                                                                                                           |                                                                                                                               |
|-------------------------------------|-----------------------------------------------------------------------------------------------------------------------------------------------------------|-------------------------------------------------------------------------------------------------------------------------------|
| Guo, J 2013 <sup>19</sup>           | Influence of dietary patterns on the risk of acute myocardial infarction in China population: the INTERHEART China study                                  | Only 'Grains' measured for association with risk of MI. No separate analysis for wholegrains                                  |
| Hansen-Krone, IJ 2012 <sup>20</sup> | Heart healthy diet and risk of myocardial infarction and venous thromboembolism. The Tromso Study                                                         | Dietary pattern assessment only. No separate analysis of wholegrains                                                          |
| Iso, H 2007 <sup>21</sup>           | Nutrition and disease in the Japan Collaborative Cohort Study for Evaluation of Cancer (JACC)                                                             | No separate analysis of brown/unrefined rice                                                                                  |
| Jacobs, DR Jr 2000 <sup>22</sup>    | Fiber from whole grains, but not refined grains, is inversely associated with all-cause mortality in older women: the Iowa women's health study           | Fiber from cereals was not exclusively from whole grain products for the high wholegrain fiber group (29% from refined grain) |
| Jansen, MC 1999 <sup>23</sup>       | Dietary fiber and plant foods in relation to colorectal cancer mortality: the seven countries study                                                       | No clinical CVD outcome measured                                                                                              |
| Johnsen, NF 2015 <sup>24</sup>      | Whole-grain products and whole-grain types are associated with lower all-cause and cause-specific mortality in the Scandinavian HELGA cohort              | No combined data for men and woman                                                                                            |
| Kanda, A 1999 <sup>25</sup>         | Association of lifestyle parameters with the prevention of hypertension in elderly Japanese men and women: a four-year follow-up of normotensive subjects | No separate analysis of brown/unrefined rice No clinical CVD outcome measured                                                 |
| Kochar, J 2012 <sup>26</sup>        | Breakfast cereals and risk of hypertension in the Physicians' Health Study I                                                                              | No clinical CVD outcome measured                                                                                              |
| Kokubo, Y 2011 <sup>27</sup>        | Dietary fiber intake and risk of cardiovascular disease in the Japanese population: the Japan Public Health Center-based study cohort                     | No separate analysis of fiber from wholegrains                                                                                |
| Larsson, SC 2016 <sup>28</sup>      | Dietary Approaches to Stop Hypertension Diet and Incidence of Stroke: Results From 2 Prospective Cohorts                                                  | Dietary pattern assessment only. No separate analysis of wholegrains                                                          |
| Li, S 2014 <sup>29</sup>            | Dietary fiber intake and mortality among survivors of myocardial infarction: prospective cohort study                                                     | Participants did not meet the inclusion criteria                                                                              |

|                                          |                                                                                                                                                                      |                                                                                           |
|------------------------------------------|----------------------------------------------------------------------------------------------------------------------------------------------------------------------|-------------------------------------------------------------------------------------------|
| Liang, W 2010 <sup>30</sup>              | White rice-based food consumption and ischemic stroke risk: a case-control study in southern china                                                                   | No separate analysis of brown rice/wholegrains                                            |
| Liu, S 2000 <sup>31</sup>                | A prospective study of whole-grain intake and risk of type 2 diabetes mellitus in US women                                                                           | No clinical CVD outcome measured                                                          |
| Mozaffarian, D 2003 <sup>32</sup>        | Cereal, fruit, and vegetable fiber intake and the risk of cardiovascular disease in elderly individuals                                                              | No separate analysis of cereal fiber from wholegrains                                     |
| Negri, E 2003 <sup>33</sup>              | Fiber intake and risk of nonfatal acute myocardial infarction                                                                                                        | No separate analysis of cereal fiber from wholegrains                                     |
| Oh, K 2005 <sup>34</sup>                 | Carbohydrate intake, glycemic index, glycemic load, and dietary fiber in relation to risk of stroke in women                                                         | No separate analysis of cereal fiber from wholegrains                                     |
| Pan, A 2012 <sup>35</sup>                | Red meat consumption and mortality: results from 2 prospective cohort studies                                                                                        | No analysis of whole grain intake and CVD outcomes                                        |
| Park, Y 2011 <sup>36</sup>               | Dietary fiber intake and mortality in the NIH-AARP diet and health study                                                                                             | No separate analysis of cereal fiber from wholegrains. No combined data for men and woman |
| Pierucci, P 2012 <sup>37</sup>           | Diet and myocardial infarction: a nested case-control study in a cohort of elderly subjects in a Mediterranean area of southern Italy                                | No analysis of wholegrains                                                                |
| Rebello, SA 2014 <sup>38</sup>           | Amount, type, and sources of carbohydrates in relation to ischemic heart disease mortality in a Chinese population: a prospective cohort study                       | No combined data for men and woman                                                        |
| Rodriguez-Campello, A 2014 <sup>39</sup> | Dietary habits in patients with ischemic stroke: a case-control study                                                                                                | No separate analysis of breaded foods from wholegrains                                    |
| Shi, Z 2012 <sup>40</sup>                | Rice intake, weight change and risk of the metabolic syndrome development among Chinese adults: the Jiangsu Nutrition Study (JIN)                                    | No analysis of wholegrain intake and CVD outcomes                                         |
| Steffen, LM 2005 <sup>41</sup>           | Associations of plant food, dairy product, and meat intakes with 15-y incidence of elevated blood pressure in young black and white adults: the Coronary Artery Risk | No clinical CVD outcome measured                                                          |



|                                    |                                                                                                                                                        |                                                                           |
|------------------------------------|--------------------------------------------------------------------------------------------------------------------------------------------------------|---------------------------------------------------------------------------|
|                                    | Development in Young Adults (CARDIA) Study                                                                                                             |                                                                           |
| Streppel, MT 2008 <sup>42</sup>    | Dietary fiber intake in relation to coronary heart disease and all-cause mortality over 40 y: the Zutphen Study                                        | No separate analysis of bread and cereal fiber from wholegrains           |
| Threapleton, DE 2013 <sup>43</sup> | Dietary fibre and cardiovascular disease mortality in the UK Women's Cohort Study                                                                      | No separate analysis of total and breakfast cereal fiber from wholegrains |
| Threapleton, DE 2015 <sup>44</sup> | Dietary fibre intake and risk of ischaemic and haemorrhagic stroke in the UK Women's Cohort Study                                                      | No separate analysis of total and breakfast cereal fiber from wholegrains |
| Wang, L 2007 <sup>45</sup>         | Whole- and refined-grain intakes and the risk of hypertension in women                                                                                 | No clinical CVD outcome measured                                          |
| Wolk, A 1999 <sup>46</sup>         | Long-term intake of dietary fiber and decreased risk of coronary heart disease among women                                                             | No separate analysis of fiber from wholegrains                            |
| Yu, D 2014 <sup>47</sup>           | Adherence to dietary guidelines and mortality: a report from prospective cohort studies of 134,000 Chinese adults in urban Shanghai                    | Dietary pattern assessment only. No separate analysis of wholegrains      |
| Yu, D 2016 <sup>48</sup>           | Dietary glycemic index, glycemic load, and refined carbohydrates are associated with risk of stroke: a prospective cohort study in urban Chinese women | No analysis of wholegrains                                                |

1. Ahn Y, Park SJ, Kwack HK, et al. Rice-eating pattern and the risk of metabolic syndrome especially waist circumference in Korean Genome and Epidemiology Study (KoGES). *BMC Public Health* 2013;**13**:61.
2. Alonso A, Beunza JJ, Bes-Rastrollo M, et al. Vegetable protein and fiber from cereal are inversely associated with the risk of hypertension in a Spanish cohort. *Arch Med Res* 2006;**37**(6):778-86.

- 1  
2  
3 3. Altorf-van der Kuil W, Engberink MF, Geleijnse JM, et al. Sources of dietary protein and risk of  
4  
5 hypertension in a general Dutch population. *Br J Nutr* 2012;**108**(10):1897-903.  
6
- 7  
8 4. Appleby PN, Thorogood M, Mann JI, et al. The Oxford Vegetarian Study: an overview. *Am J Clin Nutr*  
9  
10 1999;**70**(3 Suppl):525S-31S.  
11
- 12 5. Assmann KE, Lassale C, Andreeva VA, et al. A Healthy Dietary Pattern at Midlife, Combined with a  
13  
14 Regulated Energy Intake, Is Related to Increased Odds for Healthy Aging. *J Nutr*  
15  
16 2015;**145**(9):2139-45.  
17
- 18 6. Bae JM, Ahn YO. A nested case-control study on the high-normal blood pressure as a risk factor of  
19  
20 hypertension in Korean middle-aged men. *J Korean Med Sci* 2002;**17**(3):328-36.  
21
- 22 7. Bazzano LA, He J, Ogden LG, et al. Dietary fiber intake and reduced risk of coronary heart disease in US  
23  
24 men and women: the National Health and Nutrition Examination Survey I Epidemiologic Follow-  
25  
26 up Study. *Arch Intern Med* 2003;**163**(16):1897-904.  
27
- 28 8. Bernstein AM, Rosner BA, Willett WC. Cereal fiber and coronary heart disease: a comparison of  
29  
30 modeling approaches for repeated dietary measurements, intermediate outcomes, and long  
31  
32 follow-up. *Eur J Epidemiol* 2011;**26**(11):877-86.  
33
- 34 9. Bertoia ML, Triche EW, Michaud DS, et al. Mediterranean and Dietary Approaches to Stop  
35  
36 Hypertension dietary patterns and risk of sudden cardiac death in postmenopausal women. *Am*  
37  
38 *J Clin Nutr* 2014;**99**(2):344-51.  
39
- 40 10. Bingham CM, Lahti-Koski M, Absetz P, et al. Food choices and health during military service:  
41  
42 increases in sugar- and fibre-containing foods and changes in anthropometric and clinical risk  
43  
44 factors. *Public Health Nutr* 2012;**15**(7):1248-55.  
45  
46  
47  
48  
49
- 50 11. Buil-Cosiales P, Zazpe I, Toledo E, et al. Fiber intake and all-cause mortality in the Prevención con  
51  
52 Dieta Mediterránea (PREDIMED) study. *Am J Clin Nutr* 2014;**100**(6):1498-507.  
53  
54  
55  
56  
57  
58  
59

- 1  
2  
3 12. Burger KN, Beulens JW, Boer JM, et al. Dietary glycaemic load and glycaemic index and risk of coronary  
4 heart disease and stroke in Dutch men and women: the EPIC-MORGEN study. *PLoS One*  
5 2011;**6**(10):e25955.  
6  
7  
8  
9  
10 13. Burke V, Beilin LJ, Simmer K, et al. Predictors of body mass index and associations with  
11 cardiovascular risk factors in Australian children: a prospective cohort study. *Int J Obes*  
12 2005;**29**(1):15-23.  
13  
14  
15  
16 14. Chuang S-C, Norat T, Murphy N, et al. Fiber intake and total and cause-specific mortality in the  
17 European Prospective Investigation into Cancer and Nutrition cohort. *Am J Clin Nutr*  
18 2012;**96**(1):164-74.  
19  
20  
21  
22  
23 15. Crowe FL, Key TJ, Appleby PN, et al. Dietary fibre intake and ischaemic heart disease mortality: the  
24 European Prospective Investigation into Cancer and Nutrition-Heart study. *Eur J Clin Nutr*  
25 2012;**66**(8):950-6.  
26  
27  
28  
29  
30 16. Djoussé L, Driver JA, Gaziano JM, et al. Relation between modifiable lifestyle factors and lifetime risk  
31 of heart failure. *JAMA* 2009;**302**(4):394-400.  
32  
33  
34  
35 17. Eshak ES, Hiroyasu I, Kazumasa Y, et al. Rice consumption is not associated with risk of  
36 cardiovascular disease morbidity or mortality in Japanese men and women: a large population-  
37 based, prospective cohort study. *Am J Clin Nutr* 2014;**100**(1):199-207.  
38  
39  
40  
41 18. Flint AJ, Hu FB, Glynn RJ, et al. Whole grains and incident hypertension in men. *Am J Clin Nutr*  
42 2009;**90**(3):493-98.  
43  
44  
45  
46 19. Guo J, Li W, Wang Y, et al. Influence of dietary patterns on the risk of acute myocardial infarction in  
47 China population: the INTERHEART China study. *Chin Med J* 2013;**126**(3):464-70.  
48  
49  
50 20. Hansen-Krone IJ, Enga KF, Njolstad I, et al. Heart healthy diet and risk of myocardial infarction and  
51 venous thromboembolism. The Tromso Study. *Thromb Haemost* 2012;**108**(3):554-60.  
52  
53  
54  
55  
56  
57  
58  
59  
60

- 1  
2  
3 21. Iso H, Kubota Y. Nutrition and disease in the Japan Collaborative Cohort Study for Evaluation of  
4 Cancer (JACC). *Asian Pacific journal of cancer prevention: APJCP* 2007;**8** Suppl:35-80.  
5  
6  
7 22. Jacobs DR, Pereira MA, Meyer KA, et al. Fiber from whole grains, but not refined grains, is inversely  
8 associated with all-cause mortality in older women: the Iowa women's health study.  
9  
10  
11  
12 *J Am Coll Nutr* 2000;**19**(3 Suppl):326S-30S.  
13  
14 23. Jansen MC, Bueno-de-Mesquita HB, Buzina R, et al. Dietary fiber and plant foods in relation to  
15 colorectal cancer mortality: the Seven Countries Study. *Int J Cancer* 1999;**81**(2):174-9.  
16  
17  
18 24. Johnsen NF, Frederiksen K, Christensen J, et al. Whole-grain products and whole-grain types are  
19 associated with lower all-cause and cause-specific mortality in the Scandinavian HELGA cohort.  
20  
21  
22 *Br J Nutr* 2015;**114**(4):608-23.  
23  
24  
25 25. Kanda A, Hoshiyama Y, Kawaguchi T. Association of lifestyle parameters with the prevention of  
26 hypertension in elderly Japanese men and women: a four-year follow-up of normotensive  
27 subjects. *Asia Pac J Public Health* 1999;**11**(2):77-81.  
28  
29  
30  
31  
32 26. Kochar J, Gaziano JM, Djousse L. Breakfast cereals and risk of hypertension in the Physicians' Health  
33 Study I. *Clin Nutr* 2012;**31**(1):89-92.  
34  
35  
36  
37 27. Kokubo Y, Iso H, Saito I, et al. Dietary fiber intake and risk of cardiovascular disease in the Japanese  
38 population: the Japan Public Health Center-based study cohort. *Eur J Clin Nutr*  
39  
40  
41 2011;**65**(11):1233-41.  
42  
43  
44 28. Larsson SC, Wallin A, Wolk A. Dietary Approaches to Stop Hypertension Diet and Incidence of Stroke:  
45 Results From 2 Prospective Cohorts. *Stroke* 2016;**47**(4):986-90.  
46  
47  
48 29. Li S, Flint A, Pai JK, et al. Dietary fiber intake and mortality among survivors of myocardial infarction:  
49 prospective cohort study. *BMJ* 2014;**348**:g2659.  
50  
51  
52 30. Liang W, Lee AH, Binns CW. White rice-based food consumption and ischemic stroke risk: a case-  
53 control study in southern china. *J Stroke Cerebrovasc Dis* 2010;**19**(6):480-84.  
54  
55  
56  
57  
58  
59  
60

- 1  
2  
3 31. Liu S, Manson JE, Stampfer MJ, et al. A prospective study of whole-grain intake and risk of type 2  
4 diabetes mellitus in US women. *Am J Public Health* 2000;**90**(9):1409-15.  
5  
6  
7 32. Mozaffarian D, Kumanyika SK, Lemaitre RN, et al. Cereal, fruit, and vegetable fiber intake and the risk  
8 of cardiovascular disease in elderly individuals. *JAMA* 2003;**289**(13):1659-66.  
9  
10  
11 33. Negri E, La Vecchia C, Pelucchi C, et al. Fiber intake and risk of nonfatal acute myocardial infarction.  
12  
13 *Eur J Clin Nutr* 2003;**57**(3):464-70.  
14  
15 34. Oh K, Hu FB, Cho E, et al. Carbohydrate intake, glycemic index, glycemic load, and dietary fiber in  
16 relation to risk of stroke in women. *Am J Epidemiol* 2005;**161**(2):161-9.  
17  
18  
19 35. Pan A, Sun Q, Bernstein AM, et al. Red meat consumption and mortality: results from 2 prospective  
20 cohort studies. *Arch Intern Med* 2012;**172**(7):555-63.  
21  
22  
23 36. Park Y, Subar AF, Hollenbeck A, et al. Dietary fiber intake and mortality in the NIH-AARP diet and  
24 health study. *Arch Intern Med* 2011;**171**(12):1061-8.  
25  
26  
27 37. Pierucci P, Misciagna G, Ventura MT, et al. Diet and myocardial infarction: a nested case-control  
28 study in a cohort of elderly subjects in a Mediterranean area of southern Italy. *Nutr Metab*  
29 *Cardiovasc Dis* 2012;**22**(9):727-33.  
30  
31  
32 38. Rebello SA, Hiromi K, Chen C, et al. Amount, type, and sources of carbohydrates in relation to  
33 ischemic heart disease mortality in a Chinese population: a prospective cohort study. *Am J Clin*  
34 *Nutr* 2014;**100**(1):53-64.  
35  
36  
37 39. Rodriguez-Campello A, Jimenez-Conde J, Ois A, et al. Dietary habits in patients with ischemic stroke:  
38 a case-control study. *PLoS One* 2014;**9**(12):e114716.  
39  
40  
41 40. Shi Z, Taylor AW, Hu G, et al. Rice intake, weight change and risk of the metabolic syndrome  
42 development among Chinese adults: the Jiangsu Nutrition Study (JIN). *Asia Pac J Clin Nutr*  
43  
44  
45  
46  
47  
48  
49  
50  
51  
52  
53  
54  
55  
56  
57  
58  
59  
60

- 1  
2  
3 41. Steffen LM, Kroenke CH, Yu X, et al. Associations of plant food, dairy product, and meat intakes with  
4  
5 15-y incidence of elevated blood pressure in young black and white adults: the Coronary Artery  
6  
7 Risk Development in Young Adults (CARDIA) Study. *Am J Clin Nutr* 2005;**82**(6):1169-77; quiz 363-  
8  
9 4.  
10  
11  
12 42. Streppel MT, Ocké MC, Boshuizen HC, et al. Dietary fiber intake in relation to coronary heart disease  
13  
14 and all-cause mortality over 40 y: the Zutphen Study. *Am J Clin Nutr* 2008;**88**(4):1119-25.  
15  
16  
17 43. Threapleton DE, Greenwood DC, Burley VJ, et al. Dietary fibre and cardiovascular disease mortality in  
18  
19 the UK Women's Cohort Study. *Eur J Epidemiol* 2013;**28**(4):335-46.  
20  
21  
22 44. Threapleton DE, Burley VJ, Greenwood DC, et al. Dietary fibre intake and risk of ischaemic and  
23  
24 haemorrhagic stroke in the UK Women's Cohort Study. *Eur J Clin Nutr* 2015;**69**(4):467-74.  
25  
26  
27 45. Wang L, Gaziano JM, Liu S, et al. Whole- and refined-grain intakes and the risk of hypertension in  
28  
29 women. *Am J Clin Nutr* 2007;**86**(2):472-79.  
30  
31  
32 46. Wolk A, Manson KE, Stampfer MJ, et al. Long-term intake of dietary fiber and decreased risk of  
33  
34 coronary heart disease among women. *JAMA* 1999;**281**(21):1998-2004.  
35  
36  
37 47. Yu D, Zhang X, Xiang Y-B, et al. Adherence to dietary guidelines and mortality: a report from  
38  
39 prospective cohort studies of 134,000 Chinese adults in urban Shanghai. *Am J Clin Nutr* 2014.  
40  
41  
42 48. Yu D, Zhang X, Shu XO, et al. Dietary glycemic index, glycemic load, and refined carbohydrates are  
43  
44 associated with risk of stroke: a prospective cohort study in urban Chinese women. *Am J Clin*  
45  
46  
47  
48  
49  
50  
51  
52  
53  
54  
55  
56  
57  
58  
59  
60

1  
2  
3  
4  
5  
6  
7  
8  
9  
10  
11  
12  
13  
14  
15  
16  
17  
18  
19  
20  
21  
22  
23  
24  
25  
26  
27  
28  
29  
30  
31  
32  
33  
34  
35  
36  
37  
38  
39  
40  
41  
42  
43  
44  
45  
46  
47

**Supplementary File 4: Characteristics of Included Studies**

| Study ID          | Study Deign | Length of Intervention /Follow up          | Number of Participants | Age (mean years) | Exposure (highest tertile/quartile/quintile or 'yes' to wholegrain foods) | Comparison (lowest tertile/quartile/quintile or 'no' to wholegrain foods) | Outcomes Measured                                                           | Funding Source            | Disclosed author conflicts of interest |
|-------------------|-------------|--------------------------------------------|------------------------|------------------|---------------------------------------------------------------------------|---------------------------------------------------------------------------|-----------------------------------------------------------------------------|---------------------------|----------------------------------------|
| Djousse, L 2007   | Cohort      | 19.6 years (average)                       | 21,376                 | 53.7 ±9.5 years  | Wholegrain Breakfast Cereal ≥ 7 (1 serving=1 cup [250 mL]) servings/week  | Wholegrain Breakfast Cereal 0 servings/week                               | Heart Failure                                                               | Non-Industry <sup>1</sup> | Yes <sup>a</sup>                       |
| Holmberg, S 2009  | Cohort      | 12 years                                   | 1,752                  | 50.2 years       | Whole meal bread (wholegrain rye bread and crisp/hard bread)              | White or Rye bread                                                        | Coronary Heart Disease Death or Event (death or hospitalization)            | Industry <sup>2</sup>     | No disclosure                          |
| Huang, T 2015     | Cohort      | 14 years (average)                         | 367,442                | 61.7 years       | Wholegrain 1.20 oz eq/day                                                 | Wholegrain 0.13 oz eq/day                                                 | Cardiovascular Disease Death                                                | Industry <sup>3</sup>     | Yes <sup>b</sup>                       |
| Jacobs, DRJr 1998 | Cohort      | 10 years                                   | 34,492                 | 55–69 years      | Wholegrain 22.5 servings/week (median)                                    | Wholegrain 1.5 servings/week (median)                                     | Ischemic Heart Disease Death                                                | Non-Industry <sup>4</sup> | No disclosure                          |
| Jacobs, DRJr 1999 | Cohort      | 10 years                                   | 38,740                 | 61.5 years       | Wholegrain 22.5 servings/week (median)                                    | Wholegrain 1.5 servings/week (median)                                     | Cardiovascular Disease Death (all cardiovascular disease)                   | Non-Industry <sup>5</sup> | No disclosure                          |
| Jacobs, DRJr 2001 | Cohort      | Baseline 1977-83, followed through to 1994 | 33,848                 | 35-56 years      | Wholegrain Bread Score (2.25-5.40) *                                      | Wholegrain Bread Score (0.05-0.60) *                                      | Cardiovascular Disease Death (total cardiovascular disease)                 | Non-Industry <sup>6</sup> | No disclosure                          |
| Jacobs, DRJr 2007 | Cohort      | 17 years                                   | 27, 312                | 55–69 years      | Wholegrain ≥ 19 servings/week                                             | Wholegrain 0–3.5 servings/week                                            | Cardiovascular Disease Death                                                | Industry <sup>7</sup>     | No <sup>c</sup>                        |
| Jensen, MK 2004   | Cohort      | 14 years                                   | 42,850                 | 40-75 years      | Wholegrain 42.4 g/day (median)                                            | Wholegrain 3.5 g/day (median)                                             | Coronary Heart Disease Death or Event (non-fatal MI infarction & fatal CHD) | Industry <sup>8</sup>     | No <sup>d</sup>                        |
| Li, Y 2015        | 2 Cohorts   | 30 years & 24 years                        | 127,536                | NHS 30-55 years  | Wholegrain 4.6 % of total Energy Intake                                   | Wholegrain 0.4 % of total Energy Intake                                   | Coronary Heart Disease Death or                                             | Non-Industry <sup>9</sup> | Yes <sup>e</sup>                       |

|                     |              |                               |         |                                        |                                                                                      |                                                                    |                                                                                                                                                                                               |                            |                  |
|---------------------|--------------|-------------------------------|---------|----------------------------------------|--------------------------------------------------------------------------------------|--------------------------------------------------------------------|-----------------------------------------------------------------------------------------------------------------------------------------------------------------------------------------------|----------------------------|------------------|
|                     |              |                               |         | HPFS 40-75 years                       |                                                                                      |                                                                    | Event (non-fatal MI & CHD deaths)                                                                                                                                                             |                            |                  |
| Liu, S 1999         | Cohort       | 10 years                      | 75,521  | 38-63 years                            | Wholegrain 2.70 servings/day (median)                                                | Wholegrain 0.13 servings/day (median)                              | Coronary Heart Disease Death or Event (non-fatal MI & fatal CHD)                                                                                                                              | Non-Industry <sup>10</sup> | No disclosure    |
| Liu, S 2000         | Cohort       | 12 years                      | 75,521  | 38-63 years                            | Wholegrain 2.70 servings/day (median)                                                | Wholegrain 0.13 servings/day (median)                              | Ischemic Stroke Death or Event                                                                                                                                                                | Non-Industry <sup>11</sup> | No disclosure    |
| Liu, S 2003         | Cohort       | 5.5 years (average)           | 86,190  | 40-84 years                            | Wholegrain Breakfast Cereal 1 servings/day                                           | Rarely                                                             | Cardiovascular Disease Deaths                                                                                                                                                                 | Non-Industry <sup>12</sup> | Yes <sup>f</sup> |
| Lockheart, MSK 2007 | Case Control |                               | 211     | Case 62.5 ± 7.7<br>Control 62.25 ± 7.7 | Wholegrain Breakfast Cereal 36 g/day (median) & Wholegrain breads 240 g/day (median) | 0<br><br>94 g/day                                                  | Myocardial Infarction (first MI)                                                                                                                                                              | Industry <sup>13</sup>     | No Disclosure    |
| Mizrahi, A 2009     | Cohort       | 24 years                      | 3,932   | 40-74 years                            | Wholegrain Men 280-1321 g/day (range)<br><br>Women 195-963 g/day (range)             | Wholegrain Men 0-139 g/day (range)<br><br>Women 0-89 g/day (range) | Cerebrovascular Disease Death or Event (total strokes, including all acute strokes, subarachnoidal haemorrhages and other, undefined strokes; ischaemic stroke and intracerebral haemorrhage) | Non-Industry <sup>14</sup> | No <sup>g</sup>  |
| Muraki I, 2015      | 3 Cohorts    | 26 years, 20 years & 24 years | 207,556 | Not available                          | Brown Rice ≥ 5 servings/week                                                         | Brown Rice < 1 servings/week                                       | Cardiovascular Disease Death or Event (nonfatal MI, fatal CAD, and stroke (nonfatal or fatal))                                                                                                | Non-Industry <sup>15</sup> | No <sup>h</sup>  |



1  
2  
3  
4  
5  
6  
7  
8  
9  
10  
11  
12  
13  
14  
15  
16  
17  
18  
19  
20  
21  
22  
23  
24  
25  
26  
27  
28  
29  
30  
31  
32  
33  
34  
35  
36  
37  
38  
39  
40  
41  
42  
43  
44  
45  
46  
47

|                    |              |                                            |        |             |                                    |                                    |                                                                                                                                                                                                                                                                            |                            |                  |
|--------------------|--------------|--------------------------------------------|--------|-------------|------------------------------------|------------------------------------|----------------------------------------------------------------------------------------------------------------------------------------------------------------------------------------------------------------------------------------------------------------------------|----------------------------|------------------|
| Nettleton, JA 2008 | Cohort       | 13.3 years (average)                       | 14,153 | 45-64 years | Wholegrain 1.3 ± 0.01 servings/day | Wholegrain 1.1 ± 0.04 servings/day | Heart Failure Death or Event                                                                                                                                                                                                                                               | Non-Industry <sup>16</sup> | No <sup>i</sup>  |
| Sahyoun, NR 2006   | Cohort       | Baseline 1981-84, followed through to 1995 | 535    | 60-98 years | Wholegrain >1.94 servings/day      | Wholegrain ≤0.56 servings/day      | Cardiovascular Disease Death                                                                                                                                                                                                                                               | Non-Industry <sup>17</sup> | No <sup>i</sup>  |
| Sonestedt, E 2015  | Cohort       | 14 year (average)                          | 26,445 | 44-74 years | Wholegrain 2.5 portions/day        | Wholegrain 0 portions/day          | Cardiovascular Disease Death or Event (Incident CVD events, Stroke events, CHD (fatal or non-fatal myocardial infarction or death due to ischemic heart disease), Ischemic stroke).                                                                                        | Non-Industry <sup>18</sup> | No Disclosure    |
| Steffen, L M 2003  | Cohort       | 11 years                                   | 11,940 | 45-64 years | Wholegrain 3.0 servings/day        | Wholegrain 0.1 servings/day        | Coronary Artery Disease Death or Event (the first definite or probable MI, silent MI by electrocardiography, definite CAD death, or coronary revascularization) & Ischemic Stroke Death or Event (first definite or probable cardioembolic or thrombotic brain infarction) | Non-Industry <sup>19</sup> | Yes <sup>k</sup> |
| Tavani, A 2003     | Case Control |                                            | 881    | 25-79 years | Wholegrain Bread Consumers         | Wholegrain Bread Non-Consumers     | Myocardial Infarction (first acute)                                                                                                                                                                                                                                        | Non-Industry <sup>20</sup> | No Disclosure    |

|                   |                    |                        |         |                                                 |                                                                            |                                                                               |                                           |                                |                  |
|-------------------|--------------------|------------------------|---------|-------------------------------------------------|----------------------------------------------------------------------------|-------------------------------------------------------------------------------|-------------------------------------------|--------------------------------|------------------|
| Tavani, A<br>2004 | 3 Case<br>Controls |                        | 1,602   | 17–79<br>years                                  | Wholegrain >2<br>portions/per week                                         | Wholegrain <2<br>portions/per week                                            | Myocardial<br>Infarction (first<br>acute) | Non-<br>Industry <sup>21</sup> | No<br>Disclosure |
| Wu, H<br>2015     | 2<br>Cohort        | 26 years &<br>24 years | 118,085 | NHS 30-<br>55 years<br><br>HPFS 32-<br>87 years | Wholegrain<br><br>NHS 33 g/day (median)<br><br>HPFS 47.8 g/day<br>(median) | Wholegrain<br><br>NHS 4.2 g/day<br>(median)<br><br>HPFS 5.9 g/day<br>(median) | Cardiovascular<br>Disease Death           | Non-<br>Industry <sup>22</sup> | No <sup>1</sup>  |

\*Wholegrain bread score: slices eaten per day (question 1) times the percentage wholegrain flour used in bread. Q5 = 9 slices of bread usually eaten per day x

60% wholegrain flour. Q1 = 1 slice of bread per day x 5% wholegrain flour

**Description of Funding Source (Verbatim)**

1. The PHS is supported by grants CA-34944 and CA-40360 from the National Cancer Institute and grants HL-26490 and HL-34595 from the National Heart Lung and Blood Institute (NHLBI), Bethesda, Maryland. Dr Djousse´ is supported by grant K01 HL70444 from the NHLBI
2. This study was supported by grants from AFA Insurance, LRF Research Foundation, The Swedish Council for Working Life and Social Research and Kronoberg County Council
3. This study is funded by an unrestricted research fund from NutraSource. Dr. Qi was supported by grants from the National Heart, Lung, and Blood Institute (HL071981), the National Institute of Diabetes and Digestive and Kidney Diseases (DK091718), the Boston Obesity Nutrition Research Center (DK46200), and United States–Israel Binational Science Foundation Grant 2011036. Dr. Qi was a recipient of the American Heart Association Scientist Development Award (0730094 N). Funding from NutraSource. There were no other relationships or activities that could appear to have influenced the submitted work
4. Supported by the National Institutes of Health (research grant CA-39742)
5. This research was supported by grant CA-39742 from the National Institutes of Health
6. Institute for Nutrition Research, University of Oslo and National Health Screening Service, Oslo, Norway

- 1  
2  
3 7. RB was supported by grants from the Norwegian Research Council, The Johan Throne Holst Nutrition Research Foundation,  
4  
5 and The Norwegian Cancer Society. DRJ was supported by the Norwegian Research Council and by a grant (RO1 CA39742)  
6  
7 from the National Cancer Institute.  
8  
9
- 10 8. Supported by research grants HL35464 and CA55075 from the National Institutes of Health and a scholarship from the Danish  
11  
12 Research Foundation (to MKJ). The Kellogg Company provided unrestricted funding of the development of the whole-grain  
13  
14 database  
15  
16
- 17 9. The cohorts were supported by grants UM1 CA186107, R01 HL034594, R01 HL35464, R01 HL60712, and UM1 CA167552 from  
18  
19 the National Institutes of Health.  
20  
21
- 22 10. Supported by research grants HL24074, HL34594, and CA40356 and by nutrition training grant T32DK07703 from the  
23  
24 National Institutes of Health  
25  
26
- 27 11. The work reported in this article was supported by grants CA40356, HL24074, HL34594, and DK02767 from the National  
28  
29 Institutes of Health  
30  
31
- 32 12. Supported by grants HL-42441 and DK02767 from the National Institutes of Health  
33  
34
- 35 13. The present study was supported by NIH NRSA T32HL007779. CVD Epidemiology and Prevention, American Heart  
36  
37 Association, Greater Midwest Affiliate. Throne Holst's Foundation for Nutrition Research. The Norwegian Association of  
38  
39 Margarine Producers. DeNoFa Fabriker A/S and Tine Norwegian Dairies  
40  
41  
42  
43  
44

1  
2  
3 14. The present study received funds from the Social Insurance Institution, Finland.  
4

5  
6 15. Supported by NIH grants CA50385, CA87969, CA176726, CA167552, HL60712, HL034594, HL088521, and HL35464. QS was  
7  
8 supported by a career development grant R00HL098459 sponsored by the National Heart, Lung, and Blood Institute. FI was  
9  
10 supported by Medical Research Council Epidemiology Unit Core Support (MC\_UU\_12015/5)  
11  
12

13 16. This research was supported by the National Institutes of Health grant HL73366, training grant T32 HL07779, and contracts  
14  
15 N01-HC-55015, N01-HC-55016, N01-HC-55018, N01-HC-55019, N01-HC-55020, N01-HC-55021, and N01- HC-55022 from the  
16  
17 National Heart, Lung, and Blood Institute.  
18  
19

20 17. Supported by the US Department of Agriculture, under agreement no. 58-1950-4-401  
21

22  
23 18. This study was supported by the Swedish Medical Research Council, the Swedish Heart and Lung Foundation, the Skåne  
24  
25 University Hospital, the Albert Pålsson Research Foundation, and the Crafoord Foundation  
26  
27

28 19. Supported by the National Heart, Lung, and Blood Institute (contract nos. N01-HC-55015, N01-HC-55016, HC-55018, N01-HC-  
29  
30 55019, HC-55020, N01-HC-55021, and N01-HC-55022)  
31

32 20. This study was partly supported by "Ministero della Salute" (contract No 177, RF 2001).  
33

34  
35 21. Partly supported by "Ministero della Salute" (Contract n.177, RF 2001) and by the Commission of the EuropeanCommunities  
36  
37 (Contract No. QLK1-CT-2000-00069)  
38  
39  
40  
41  
42  
43  
44

1  
2  
3 22. This work was supported by research grants R01 DK58845 (Dr Hu), P01 CA87969, R01 HL034594, UM1 CA167552 (DrWillett),  
4  
5 R01 HL35464 (Dr Rimm), HL60712 (DrHu), U54CA155626 (Dr Hu), and CA055075 from the National Institutes of Health and  
6  
7 Career Development Award R00HL098459 from the National Heart, Lung, and Blood Institute (Dr Sun)  
8  
9  
10  
11  
12  
13  
14  
15  
16  
17  
18  
19  
20  
21  
22  
23  
24  
25  
26  
27  
28  
29  
30  
31  
32  
33  
34  
35  
36  
37  
38  
39  
40  
41  
42  
43  
44  
45  
46  
47

For peer review only

**Description of Author Disclosure Statement (Verbatim)**

- a) Dr Gaziano has received investigator-initiated research grants from BASF, DSM Pharmaceuticals, Wyeth Pharmaceuticals, McNeil Consumer Products, and Pliva as well as honoraria from Bayer and Pfizer for speaking engagements. He is a consultant for Bayer, McNeil Consumer Products, Wyeth Pharmaceuticals, Merck, Nutraquest, and GlaxoSmithKline
- b) A Lee NutraSource (AWL), Royal Oak, MI 48073, USA. S Cho NutraSource (SSC), Clarksville, MD 21029, USA
- c) None of the authors had a conflict of interest
- d) None of the authors had any conflicts of interest
- e) Dr. Hu has received honoraria from the Hass Avocado Board for participating in an academic symposium; and grant support from Metagenics and the California Walnut Commission
- f) In 2001 SL received honoraria from General Mills Co for a presentation unrelated to this article
- g) None of the authors had any personal or financial conflict of interest.
- h) All authors reported no conflicts of interest related to the study.
- i) The authors have no conflicts of interest to report
- j) None of the authors had a conflict of interest
- k) None of the authors had any conflicts of interest except for DRJ, who holds a research award from General Mills, Inc, Minneapolis

1  
2  
3 l) None reported  
4  
5  
6  
7  
8  
9  
10  
11  
12  
13  
14  
15  
16  
17  
18  
19  
20  
21  
22  
23  
24  
25  
26  
27  
28  
29  
30  
31  
32  
33  
34  
35  
36  
37  
38  
39  
40  
41  
42  
43  
44  
45  
46  
47

For peer review only



## MOOSE Checklist for Meta-analyses of Observational Studies

| Item No                                     | Recommendation                                                                                                                                                                                                                                                               | Reported on Page No                             |
|---------------------------------------------|------------------------------------------------------------------------------------------------------------------------------------------------------------------------------------------------------------------------------------------------------------------------------|-------------------------------------------------|
| Reporting of background should include      |                                                                                                                                                                                                                                                                              |                                                 |
| 1                                           | Problem definition                                                                                                                                                                                                                                                           | 7                                               |
| 2                                           | Hypothesis statement                                                                                                                                                                                                                                                         | 10                                              |
| 3                                           | Description of study outcome(s)                                                                                                                                                                                                                                              | 10-11                                           |
| 4                                           | Type of exposure or intervention used                                                                                                                                                                                                                                        | 9-10                                            |
| 5                                           | Type of study designs used                                                                                                                                                                                                                                                   | 9                                               |
| 6                                           | Study population                                                                                                                                                                                                                                                             | 9                                               |
| Reporting of search strategy should include |                                                                                                                                                                                                                                                                              |                                                 |
| 7                                           | Qualifications of searchers (eg, librarians and investigators)                                                                                                                                                                                                               | 8                                               |
| 8                                           | Search strategy, including time period included in the synthesis and key words                                                                                                                                                                                               | & Supp File 1                                   |
| 9                                           | Effort to include all available studies, including contact with authors                                                                                                                                                                                                      | 8                                               |
| 10                                          | Databases and registries searched                                                                                                                                                                                                                                            | 8                                               |
| 11                                          | Search software used, name and version, including special features used (eg, explosion)                                                                                                                                                                                      | 8                                               |
| 12                                          | Use of hand searching (eg, reference lists of obtained articles)                                                                                                                                                                                                             | 8                                               |
| 13                                          | List of citations located and those excluded, including justification                                                                                                                                                                                                        | 16 & Supplementary File 3                       |
| 14                                          | Method of addressing articles published in languages other than English                                                                                                                                                                                                      | 10                                              |
| 15                                          | Method of handling abstracts and unpublished studies                                                                                                                                                                                                                         | 10                                              |
| 16                                          | Description of any contact with authors                                                                                                                                                                                                                                      | 14                                              |
| Reporting of methods should include         |                                                                                                                                                                                                                                                                              |                                                 |
| 17                                          | Description of relevance or appropriateness of studies assembled for assessing the hypothesis to be tested                                                                                                                                                                   | 9-10                                            |
| 18                                          | Rationale for the selection and coding of data (eg, sound clinical principles or convenience)                                                                                                                                                                                | 7 (according to published protocol Supp File 2) |
| 19                                          | Documentation of how data were classified and coded (eg, multiple raters, blinding and interrater reliability)                                                                                                                                                               | 13-14                                           |
| 20                                          | Assessment of confounding (eg, comparability of cases and controls in studies where appropriate)                                                                                                                                                                             | 14, (included in RoB assessment)                |
| 21                                          | Assessment of study quality, including blinding of quality assessors, stratification or regression on possible predictors of study results                                                                                                                                   | 14 & 19                                         |
| 22                                          | Assessment of heterogeneity                                                                                                                                                                                                                                                  | 15-16                                           |
| 23                                          | Description of statistical methods (eg, complete description of fixed or random effects models, justification of whether the chosen models account for predictors of study results, dose-response models, or cumulative meta-analysis) in sufficient detail to be replicated | 15-16                                           |
| 24                                          | Provision of appropriate tables and graphics                                                                                                                                                                                                                                 | 17-18                                           |
| Reporting of results should include         |                                                                                                                                                                                                                                                                              |                                                 |
| 25                                          | Graphic summarizing individual study estimates and overall estimate                                                                                                                                                                                                          | 21                                              |
| 26                                          | Table giving descriptive information for each study included                                                                                                                                                                                                                 | 17 & Supplementary                              |

|    |                                                        |        |
|----|--------------------------------------------------------|--------|
|    |                                                        | File 4 |
| 27 | Results of sensitivity testing (eg, subgroup analysis) | N/A    |
| 28 | Indication of statistical uncertainty of findings      | 19-21  |

| Item No                                 | Recommendation                                                                                                            | Reported on Page No |
|-----------------------------------------|---------------------------------------------------------------------------------------------------------------------------|---------------------|
| Reporting of discussion should include  |                                                                                                                           |                     |
| 29                                      | Quantitative assessment of bias (eg, publication bias)                                                                    | 21                  |
| 30                                      | Justification for exclusion (eg, exclusion of non-English language citations)                                             | N/A                 |
| 31                                      | Assessment of quality of included studies                                                                                 | 21-23               |
| Reporting of conclusions should include |                                                                                                                           |                     |
| 32                                      | Consideration of alternative explanations for observed results                                                            | 21-22               |
| 33                                      | Generalization of the conclusions (ie, appropriate for the data presented and within the domain of the literature review) | 21-22               |
| 34                                      | Guidelines for future research                                                                                            | 24-25               |
| 35                                      | Disclosure of funding source                                                                                              | 33                  |

review only

# BMJ Open

## The association of industry ties with outcomes of studies examining the effect of wholegrain foods on cardiovascular disease and mortality: Systematic review and Meta-analysis

|                                 |                                                                                                                                                                                                                                                                                                                                                                                                 |
|---------------------------------|-------------------------------------------------------------------------------------------------------------------------------------------------------------------------------------------------------------------------------------------------------------------------------------------------------------------------------------------------------------------------------------------------|
| Journal:                        | <i>BMJ Open</i>                                                                                                                                                                                                                                                                                                                                                                                 |
| Manuscript ID                   | bmjopen-2018-022912.R1                                                                                                                                                                                                                                                                                                                                                                          |
| Article Type:                   | Research                                                                                                                                                                                                                                                                                                                                                                                        |
| Date Submitted by the Author:   | 20-Dec-2018                                                                                                                                                                                                                                                                                                                                                                                     |
| Complete List of Authors:       | Chartres, Nicholas; The University of Sydney, Faculty of Pharmacy<br>Fabbri, Alice; The University of Sydney<br>McDonald, Sally ; The University of Sydney<br>Turton, Jessica; The University of Sydney<br>Allman-Farinelli, Margaret; University of Sydney, Faculty of Science<br>McKenzie, Joanne; Monash University<br>Bero, Lisa; University of Sydney Faculty of Health Sciences, Pharmacy |
| <b>Primary Subject Heading</b>: | Research methods                                                                                                                                                                                                                                                                                                                                                                                |
| Secondary Subject Heading:      | Nutrition and metabolism, Public health                                                                                                                                                                                                                                                                                                                                                         |
| Keywords:                       | NUTRITION & DIETETICS, STATISTICS & RESEARCH METHODS, PUBLIC HEALTH                                                                                                                                                                                                                                                                                                                             |
|                                 |                                                                                                                                                                                                                                                                                                                                                                                                 |

SCHOLARONE™  
Manuscripts

1  
2  
3 1 **The association of industry ties with outcomes of studies examining the effect of wholegrain**  
4 **foods on cardiovascular disease and mortality: Systematic review and Meta-analysis**  
5 2  
6

7 3  
8  
9 4 Chartres N, The University of Sydney, D17, The Hub, 6th floor, Charles Perkins Centre, The  
10 University of Sydney, NSW, 2006, Australia, PhD Candidate  
11 5  
12 6

13  
14 7 Fabbri A, The University of Sydney, D17, The Hub, 6th floor, Charles Perkins Centre, The  
15 University of Sydney, NSW, 2006, Australia, Postdoctoral Research Fellow  
16 8  
17 9

18  
19  
20 10 McDonald S, The University of Sydney, D17, The Hub, 6th floor, Charles Perkins Centre, The  
21 University of Sydney, NSW, 2006, Research Assistant  
22 11  
23 12

24  
25 13 Turton J, The University of Sydney, University of Sydney, D17, The Hub, 6th floor, Charles  
26 Perkins Centre, The University of Sydney, NSW, 2006, Australia  
27 14  
28 15

29  
30  
31 16 Allman-Farinelli M, The University of Sydney, D17, The Hub, 4th floor, Charles Perkins Centre,  
32 The University of Sydney, NSW, 2006, Australia, Professor  
33 17  
34 18

35  
36 19 McKenzie J E, Monash University, 553 St Kilda Road, Melbourne, VIC, 3004, Australia, Senior  
37 Research Fellow  
38 20  
39 21

40  
41  
42 22 Bero L, The University of Sydney, D17, The Hub, 6th floor, Charles Perkins Centre, The University  
43 of Sydney, NSW, 2006, Australia, Professor  
44 23  
45 24

46  
47 25 **Corresponding author:** Prof. Lisa Bero, email [lisa.bero@sydney.edu.au](mailto:lisa.bero@sydney.edu.au); Telephone +612 8627  
48 1881  
49 26

50  
51 27 **Keywords:** Nutrition, Industry Sponsorship, Conflict of Interest, Bias, Food Industry  
52  
53

54 28 **Word Count:** 4264  
55

1  
2  
3 **29 Abstract**

4 **30 Objective:** To determine if observational studies examining the association of wholegrain foods  
5  
6  
7 **31** with cardiovascular disease with food industry sponsorship and / or authors with conflicts of  
8  
9  
10 **32** interest with the food industry are more likely to have results and/ or conclusions that are  
11  
12 **33** favourable to industry than those with no industry ties. To determine whether studies with  
13  
14  
15 **34** industry ties differ in their risk of bias compared with studies with no industry ties.

16  
17 **35 Design:** Systematic review and meta-analysis of observational studies.

18  
19  
20 **36 Data sources:** We searched 8 databases from 1997-2017 and hand searched the reference lists  
21  
22 **37** of included studies.

23  
24 **38 Eligibility Criteria for selecting studies:** Cohort and case control studies that quantitatively  
25  
26  
27 **39** examined the association of wholegrains or wholegrain foods with cardiovascular disease  
28  
29  
30 **40** outcomes in healthy adults or children.

31  
32 **41 Results:** 21 of the 22 studies had a serious or critical risk of bias. Studies with industry ties more  
33  
34  
35 **42** often had favourable results compared to those with no industry ties, but the confidence  
36  
37 **43** interval was wide, RR= 1.44 (95% CI 0.88-2.35). The same association was found for study  
38  
39  
40 **44** conclusions. We did not find a difference in effect size (magnitude of RRs) between studies with  
41  
42 **45** industry ties, RR = 0.77 (95% CI 0.58-1.01) and studies with no industry ties, RR = 0.85 (95% CI  
43  
44 **46** 0.73-1.00) (P=0.50) I<sup>2</sup> 0%. These results were comparable for studies that measured the  
45  
46  
47 **47** magnitude using hazard ratios; industry ties HR=0.82 (95% CI 0.76-0.88) vs. no industry ties  
48  
49 **48** HR=0.86 (95% CI 0.81-0.91) (P=0.34) I<sup>2</sup> 0%.

50  
51 **49 Conclusions:** We did not establish that the presence of food industry sponsorship or authors  
52  
53  
54 **50** with a COI with the food industry was associated with results or conclusions that favour industry

1  
2  
3 51 sponsors. The association of food industry sponsorship or authors with a COI with the food  
4  
5  
6 52 industry and favourable results or conclusions is uncertain. However, our analysis was hindered  
7  
8 53 by the low level of COI disclosure in the included studies. Our findings support international  
9  
10 54 reforms to improve the disclosure and management of conflicts of interest in nutrition research.  
11  
12  
13 55 Without such disclosures, it will not be possible to determine if the results of nutrition research  
14  
15 56 are free of food industry influences and potential biases.

17  
18 57 **Systematic review registration:** PROSPERO ID CRD42017055841  
19

20 58

22 59

24 60

26 61

28 62

30 63

32 64

34 65

36 66

38 67

1  
2  
3 69 **Strengths and limitations of this study**  
4

- 5  
6 70 - This is the first systematic review and meta-analysis to evaluate the association of  
7  
8 71 industry sponsorship and author conflicts of interest (COI) with the results, conclusions  
9  
10 72 and risk of bias of primary nutrition studies examining the effect of wholegrain foods on  
11  
12 73 cardiovascular disease outcomes.  
13  
14  
15 74 - We conducted a comprehensive search and followed explicit and well-defined inclusion  
16  
17 and exclusion criteria for the included studies.  
18 75  
19  
20 76 - Although our sample was small, we searched several databases and reference lists of  
21  
22 included studies.  
23 77  
24  
25 78 - We did not attempt to contact the authors of studies lacking a COI disclosure statement,  
26  
27 thus, we may be underestimating the number of articles that had authors with conflicts  
28 79  
29 of interest.  
30 80  
31  
32 81 - Our assessment of risk of bias in the included studies was based on a tool that is under  
33  
34 development, but changes to the tool are unlikely to affect the risk of bias ratings.  
35 82  
36  
37  
38  
39  
40  
41  
42  
43  
44  
45  
46  
47  
48  
49  
50  
51  
52  
53  
54  
55  
56  
57  
58  
59  
60

## 84 **Background**

85 Dietary guidelines are designed to promote wellbeing and reduce the risk of non-communicable  
86 diseases. Recent evaluations of the development of dietary guidelines have identified concerns  
87 with the methods of the systematic reviews and how evidence from these reviews is  
88 synthesised into final recommendations.<sup>1-3</sup> Several countries, including the United Kingdom,  
89 United States, and Australia have dietary guidelines offering recommendations around the  
90 consumption of wholegrain foods.<sup>4-6</sup> The guidelines conclude that there is a probable  
91 association between whole grain consumption and a reduced risk of cardiovascular disease.<sup>4-6</sup>  
92 These recommendations are supported by recent systematic reviews and meta-analyses of  
93 prospective cohort studies, which have found a consistent, inverse relationship between  
94 wholegrain intake and cardiovascular disease (CVD) risk and mortality.<sup>7-9</sup> However, the  
95 beneficial effects of wholegrains on CVD when assessed in randomised controlled trials (RCTs)  
96 are uncertain.<sup>10</sup>

97  
98 Wholegrain products can be defined in various ways, including by the species (e.g., wheat, oats),  
99 components (e.g., endosperm, bran, germ), and percentages (e.g., 25%-100%). While some food  
100 regulators use a definition of 100% retention of wholegrain content, the epidemiological  
101 literature typically uses 25% or more retained content. In the development of the Australian  
102 Dietary Guidelines, the most common definition for whole grain foods was those containing  
103 25% or more of wholegrains.<sup>11</sup>

104



1  
2  
3 105 Dietary guidelines use a variety of methods to assess bias in primary research studies, but these  
4  
5 106 do not assess one potential source of bias – financial conflicts of interest.<sup>12</sup> Across a variety of  
6  
7  
8 107 research areas, industry sponsorship and author conflicts of interest (COI) have been found to  
9  
10 108 be associated with outcomes that favour the study sponsor.<sup>13-15</sup> Even when controlling for  
11  
12 109 methodological biases, industry sponsored studies are more likely to have results that favour  
13  
14 110 the sponsor's product than those studies with no or other sources of sponsorship.<sup>13</sup> Industry  
15  
16 111 sponsors may bias research via the questions they ask (research agenda), how they design and  
17  
18 112 conduct a study, the selection of results they report and through 'spin' on conclusions.<sup>16-19</sup>  
19  
20  
21  
22  
23  
24

25 114 A systematic review of methodological studies that compared food industry sponsored studies  
26  
27 115 with those that had no or other sources of sponsorship found that food industry sponsored  
28  
29 116 studies were more likely to have favourable conclusions than non-industry sponsored studies.<sup>20</sup>  
30  
31 117 However, there were insufficient data to quantitatively assesses the association of sponsorship  
32  
33 118 with study results. Only one methodological study examined the association of author COI and  
34  
35 119 conclusions, and found a statistically significant association between them.<sup>21</sup>  
36  
37  
38  
39

40 120  
41  
42 121 Funding sources and author COI may be a risk of bias in studies of wholegrain consumption as  
43  
44 122 these studies could test formulated or processed wholegrain products, such as breakfast  
45  
46 123 cereals. Industry sponsors may gain financially from finding that these types of products have  
47  
48 124 health benefits that can be used to market their products. There has been no assessment of the  
49  
50 125 association of food industry sponsorship and author COI with the food industry and the  
51  
52 126 statistical significance of results, effect sizes, conclusions and risk of bias of observational  
53  
54  
55

1  
2  
3 127 studies examining the cardiovascular health benefits of wholegrain consumption. The primary  
4  
5  
6 128 objective of this review is to determine whether:

- 7  
8 129 • Primary studies examining the association of wholegrain foods with cardiovascular  
9  
10 130 disease with food industry sponsorship and / or authors with COI with the food industry  
11  
12  
13 131 are more likely to have results and/ or conclusions that are favourable to industry than  
14  
15 132 those with no industry ties.  
16  
17  
18 133 • This review also examines whether any differences between industry and non-industry  
19  
20 134 sponsored studies could be related to their methods or interpretation of results.  
21  
22  
23

24 135 The secondary objectives of this review are to determine whether:

- 25  
26  
27  
28 136 • Studies with food industry sponsorship and / or authors with COI with the food industry  
29  
30 137 differ in their risk of bias compared with studies with no industry ties.  
31  
32  
33 138 • Studies with food industry sponsorship and / or authors with COI with the food industry  
34  
35  
36 139 have a higher level of discordance between study results and conclusions, with the  
37  
38 140 conclusions more likely to be favourable compared to the results.  
39  
40

## 41 141 **METHODS**

42 142 We conducted a systematic review of observational studies examining the association of  
43  
44  
45  
46 143 wholegrain consumption with cardiovascular disease.  
47  
48

49 144  
50  
51  
52  
53  
54  
55

## 146 **Literature search strategy**

147 The search was based on the Process Manual used in the development of the 2013 Australian  
148 Dietary Guidelines<sup>22</sup> and the advice of an information specialist. We searched the following  
149 databases from January 1997-October 2017: MEDLINE; CINAHL; PubMed; PreMEDLINE;  
150 Cochrane Library; PsycINFO; Science Direct; and ERIC. The search strategy we used for Ovid  
151 MEDLINE is shown in Supplementary file 1. We adapted this strategy for the other databases.  
152 We also hand searched the references lists of identified studies and reviews. The search also  
153 included terms for randomized control trials to identify relevant trials for a future systematic  
154 review.

## 156 **Eligibility Criteria**

157 The randomized controlled trials identified in our search were included in another review  
158 currently under development. We selected observational studies for this review. This review  
159 included primary nutrition studies of cohort or case control designs that quantitatively  
160 examined the benefits or harms of wholegrain consumption related to cardiovascular disease  
161 outcomes in healthy children and/or adults.

162  
163 We included studies that defined wholegrains in any way, as defined by the author of the  
164 included study. If total wholegrain consumption had been assessed in the study, we included  
165 this as our only exposure. If total wholegrain consumption as an exposure was not available, we  
166 included any type of wholegrain consumption (i.e. wholegrain cereal, breakfast cereal, bread,  
167 rice etc) as our exposure. We included studies that compared wholegrain food to other foods

1  
2  
3 168 or compared various levels of wholegrain consumption. We included the result representing the  
4  
5  
6 169 effect of the highest level of wholegrain consumption compared to the lowest level of  
7  
8 170 wholegrain consumption (e.g., 'yes' to wholegrain consumption vs. 'no' to wholegrain  
9  
10 171 consumption, tertile 3 vs. tertile 1, quartile 4 vs. quartile 1, quintile 5 vs. quintile 1). If our pre-  
11  
12 172 specified rules for selection did not uniquely identify one exposure for inclusion in the meta-  
13  
14 173 analysis, we randomly selected one result.  
15  
16  
17  
18 174

19  
20 175 We included studies that had a clinical outcome measure related to cardiovascular disease,  
21  
22 176 defined as mortality related to specific cardiovascular events, and/or cardiovascular events,  
23  
24 177 (e.g., first myocardial infarction, total stroke etc.). If 'cardiovascular disease mortality/death/s'  
25  
26 178 (verbatim) had been assessed, we included this as our only outcome. If not, we included any  
27  
28 179 type of cardiovascular disease mortality (e.g., coronary heart disease mortality, stroke mortality  
29  
30 180 etc.) as our outcome. If there were no mortality outcomes assessed in the study, we included  
31  
32 181 any cardiovascular disease event as our outcome. If a study assessed subgroups of  
33  
34 182 cardiovascular disease deaths and events (e.g., intracerebral haemorrhages, ischaemic stroke)  
35  
36 183 and also assessed them collectively (e.g., cerebrovascular diseases), we took the result that had  
37  
38 184 assessed them collectively. If our pre-specified rules for selection did not uniquely identify one  
39  
40 185 outcome for inclusion in the meta-analysis, we randomly selected one result.  
41  
42  
43  
44  
45  
46  
47  
48

49 187 We excluded conferences presentations, opinion pieces and letters to the editor. We had no  
50  
51 188 language restrictions.  
52  
53

54 189  
55  
56  
57  
58  
59  
60

## 190 **Types of Outcome Measures**

### 191 **Primary Outcomes**

192 We hypothesized that studies with food industry sponsorship and/or authors with a COI with  
193 the food industry would be more likely to have favourable findings than those with no industry  
194 ties. We assessed three primary outcomes:

#### 195 1. Statistical significance of results favourable to the sponsor

196 Favourable results were defined as results that were favourable to the sponsor's product(s),  
197 either indicating greater health benefits or less harm than the comparator. Specifically, for  
198 studies of health benefits of wholegrains, favourable results were defined as those that were  
199 statistically significant at the 0.05 level (two tailed). For studies of harms of wholegrains,  
200 favourable results were defined as those where harms were not statistically significant at the  
201 0.05 level or there were a statistically significant higher number of harms in the comparator  
202 group. Otherwise, results were classified as unfavourable.

#### 204 2. Effect size of results

205 Effect size was defined as the risk ratio, hazard ratio or odds ratio of the association between  
206 whole grains and a clinical outcome of cardiovascular disease. We compared the magnitude of  
207 the pooled effect estimates in studies with food industry sponsorship and/or authors with a COI  
208 compared with studies with no industry ties.

209

1  
2  
3 211 3. Conclusions  
4

5 212 Conclusions that suggested that the wholegrain intervention being studied was beneficial to  
6  
7  
8 213 health and / or safe were considered favourable to the study sponsor. Otherwise, the  
9  
10 214 conclusions were considered unfavourable.

11  
12  
13 215

14  
15 216 **Secondary Outcomes**

16  
17  
18 217 We assessed two secondary outcomes:

19  
20  
21 218 1. The risk of bias of the included studies  
22

23  
24 219

25  
26 220 We hypothesized that studies with industry sponsorship and/or authors with a COI with the  
27  
28 221 food industry would have the same overall risk of bias as those with no industry ties.  
29

30  
31 222

32  
33  
34 223 2. Concordance between study results and conclusions  
35

36  
37 224

38  
39 225 We hypothesized that studies with industry sponsorship and/or authors with a COI would be  
40  
41 226 more likely to have discordant results and conclusions, with results not favouring the sponsor  
42  
43 227 and conclusions favouring the sponsor, than those with no industry ties.  
44

45  
46 228

47  
48  
49 229 **Selection of studies**

50  
51 230 Three investigators (NC, SMc & JT, working in pairs) independently screened the titles and

52  
53 231 abstracts of all retrieved records for obvious exclusions. Full text of potentially eligible studies  
54

1  
2  
3 232 was then retrieved, and three investigators (NC, SMc & JT) assessed these against our inclusion  
4  
5 233 criteria. Agreement was reached by consensus.  
6  
7

8 234

9  
10 235 **Data Collection and analysis**

11  
12 236 Three assessors (NC, SMc & JT) independently extracted the following data from each included  
13  
14 237 study. Discrepancies in data extraction were resolved by consensus. If agreement could not be  
15  
16 238 reached, a fourth assessor (LB) adjudicated the outcome.  
17  
18

19  
20 239 From each study we extracted:  
21

- 22  
23 240 • Year of publication  
24  
25 241 • Study design (cohort or case control)  
26  
27 242 • Sample size of study  
28  
29 243 • Age of participants  
30  
31 244 • Exposure duration or observation period  
32  
33 245 • How the study defined wholegrain (verbatim)  
34  
35 246 • Level of wholegrain content in wholegrain foods  
36  
37 247 • Disclosure of funding source (no disclosure, yes and there is a sponsor, the authors state  
38  
39 248 they received no funding for their work)  
40  
41 249 • Name of the funders of the study (verbatim)  
42  
43 250 • Role of the funders (role of the sponsor not mentioned, sponsor not involved in study  
44  
45 251 design and analyses, sponsor involved, N/A)  
46  
47  
48  
49  
50  
51  
52  
53  
54  
55

- 1  
2  
3 252 • Disclosure of author COI (no disclosure, yes, the authors state they had no conflicts of  
4  
5  
6 253 interest to declare)  
7  
8 254 • Authors COI statement (verbatim)  
9  
10  
11 255 • Outcomes assessed in the study (any cardiovascular disease death and/or event)  
12  
13 256 • The numerical results of the study (eg., OR, HR)  
14  
15  
16 257

17  
18 258 We stored all extracted data from the included studies in REDcap, a secure web-based  
19  
20 259 application for the collection and management of data.<sup>23</sup>  
21  
22  
23 260

### 24 25 261 ***Classification of industry sponsorship and author conflicts of interest***

26  
27  
28 262 Sponsorship was categorized as 1) industry or 2) non-industry. We defined industry sponsored  
29  
30 263 studies as those declaring any sponsorship from the food industry, including if the study  
31  
32 264 received 'mixed funding' from the food industry, non-profit organizations or other industries  
33  
34  
35 265 (i.e. pharmaceutical). Any study with an author with any disclosed financial tie to the food  
36  
37 266 industry was classified as having a conflict of interest (COI). Author COI were categorized as 1)  
38  
39 267 presence of a COI with the food industry or 2) no COI. Any studies that did not contain an  
40  
41  
42 268 author COI disclosure statement were classified as no COI. We contacted the authors of one  
43  
44  
45 269 paper<sup>24</sup> for clarification on their disclosure of funding source.  
46  
47  
48 270

### 49 50 271 **Assessment of risk of bias in included studies**

51  
52 272 We used an adapted version of the Cochrane Collaboration's 'Risk of Bias in Non-Randomized  
53  
54 273 Studies-of Interventions' (ROBINS-I)<sup>25</sup> tool to measure the risk of bias of included observational  
55



1  
2  
3 274 studies. The tool assesses bias across seven domains. Each domain is assessed at a low,  
4  
5 275 moderate, serious or critical risk of bias, or no information. The domain rating with the highest  
6  
7 276 risk of bias determines the overall risk of bias rating for the study. For example, if a study is  
8  
9 277 rated as being at a serious risk of bias in one domain, the overall risk of bias rating is 'serious.'

10  
11  
12  
13 278

### 14 15 279 **Analysis**

16  
17 280 We report frequencies and percentages of study characteristics across all studies, and  
18  
19 281 separately, by funding source. We visually depict the overall risk of bias rating and the ratings  
20  
21 282 for each domain by study.  
22  
23  
24

25 283

26  
27 284 We calculated risk ratios or hazard ratios (and 95% confidence intervals) to quantify the  
28  
29 285 association between food industry sponsorship and / or authors with COI with the food industry  
30  
31 286 and favourable results, favourable conclusions and the overall study risk of bias rating. For the  
32  
33 287 risk of bias rating analysis we dichotomised the overall risk of bias ratings as low (low or  
34  
35 288 moderate) or high (serious or critical). We had planned to calculate a RR for level of  
36  
37 289 concordance, however since in all studies there was concordance between the results and  
38  
39 290 conclusions, we did not undertake this analysis.  
40  
41  
42  
43

44  
45 291

46  
47 292 We used meta-analysis to examine whether food industry sponsorship and / or authors with COI  
48  
49 293 with the food industry modified the magnitude of association between whole grains and  
50  
51 294 cardiovascular disease outcomes. Specifically, we undertook a subgroup analysis within a  
52  
53 295 random effects meta-analysis model that compared the pooled associations across subgroups

1  
2  
3 296 defined by industry sponsorship. The associations were pooled using inverse variance weighting  
4  
5  
6 297 and DerSimonian and Laird's method of moments estimator was used to estimate between  
7  
8 298 study heterogeneity. Separate meta-analyses were fitted for studies that had measured the  
9  
10 299 association using hazard ratios and those that had used either risk ratios or odds ratios. Given  
11  
12  
13 300 cardiovascular events were rare, the odds ratios approximated risk ratios. We quantified  
14  
15 301 heterogeneity for subgroup differences using the  $I^2$  statistic <sup>26</sup> and tested for heterogeneity  
16  
17 302 using the Chi2 test. Review Manager 5.3 was used to analyse the data. <sup>27</sup>  
18  
19  
20 303  
21  
22

#### 23 304 **Protocol Registration**

25  
26  
27 305 The protocol is published in PROSPERO <sup>28</sup> ID CRD42017055841. (Supplementary file 2)  
28  
29  
30 306

#### 31 307 **Patient Involvement**

32  
33 308 No patients were involved in the completion of this review.  
34  
35  
36  
37 309  
38  
39

## 40 310 **RESULTS**

### 41 311 **Search results**

42  
43  
44 312 We identified 6818 references for screening, from which, 22 studies met the inclusion criteria  
45  
46  
47 313 (Figure 1). See Supplementary file 3 for 'List of excluded Studies' and reasons for exclusion.  
48  
49  
50 314  
51  
52  
53  
54  
55

### 316 **Characteristics of included Studies**

317 All studies were published between 1998 and 2015. Three of the studies were case control and  
 318 19 were cohort design. All studies contained a sponsorship disclosure. Five studies disclosed  
 319 food industry sponsorship, but only one of these had a statement describing the role of the  
 320 sponsor. Five studies contained an author with a COI with the food industry. Ten studies did not  
 321 contain an author conflict of interest disclosure statement. Nine studies contained either food  
 322 industry sponsorship or had an author with a COI.

323  
 324 A greater proportion of industry sponsored studies (67%) than non-industry sponsored studies  
 325 (31%) used a definition of wholegrain as greater than 25%, and most of these examined  
 326 breakfast cereals (Table 1). Industry sponsored studies were also more likely than non-industry  
 327 studies to focus on a specific food (44%) than total wholegrain intake (23%) (Table 1). Industry  
 328 sponsored studies were less likely (56%) to have a serious or critical risk of bias in classification  
 329 of exposures than non-industry sponsored studies (85%). Other characteristics were similarly  
 330 distributed across industry vs. non-industry sponsored studies. Details of each individual study  
 331 are in Supplementary file 4.

332

333 **Table 1. Characteristics of the included studies by sponsorship and author COI**

334

| Characteristic | Category | Funding Source, n (% <sup>1</sup> ) |                       |                                      |
|----------------|----------|-------------------------------------|-----------------------|--------------------------------------|
|                |          | Total<br>N = 22                     | Industry/COI<br>N = 9 | Non-<br>Industry/No<br>COI<br>N = 13 |
| <b>Sex</b>     | Male     | 4 (18)                              | 3 (33)                | 0 (0)                                |
|                | Female   | 6 (27)                              | 1 (11)                | 6 (46)                               |

|                                |                                                                   |         |         |         |
|--------------------------------|-------------------------------------------------------------------|---------|---------|---------|
|                                | Both                                                              | 12 (55) | 5 (56)  | 7 (54)  |
| <b>Sample Size, quartiles</b>  | <5000                                                             | 6 (27)  | 2 (22)  | 4 (31)  |
|                                | 5000-50,000                                                       | 10 (45) | 4 (44)  | 5 (38)  |
|                                | >50,000                                                           | 6 (27)  | 3 (33)  | 4 (31)  |
| <b>Length of Follow up</b>     | N/A*                                                              | 3 (14)  | 1 (11)  | 2 (15)  |
|                                | <10 years                                                         | 4 (18)  | 1 (11)  | 0 (0)   |
|                                | 10-15 years                                                       | 9 (41)  | 4 (44)  | 8 (62)  |
|                                | >15                                                               | 6 (27)  | 3 (33)  | 3 (23)  |
| <b>Percent Wholegrain</b>      | Not defined                                                       | 12 (55) | 3 (33)  | 9 (69)  |
|                                | >25%**                                                            | 10 (45) | 6 (67)  | 4 (31)  |
| <b>Type of Wholegrain</b>      | Only Wholegrain Intake                                            | 15 (68) | 5 (56)  | 10 (77) |
|                                | Individual Wholegrain Food***                                     | 7 (32)  | 4 (44)  | 3 (23)  |
| <b>Primary Outcome</b>         | Favourable to Wholegrains                                         | 16 (73) | 8 (89)  | 8 (62)  |
|                                | Unfavourable to Wholegrains                                       | 6 (27)  | 1 (11)  | 5 (38)  |
| <b>Conclusions</b>             | Favourable to Wholegrains                                         | 16 (73) | 8 (89)  | 8 (62)  |
|                                | Unfavourable to Wholegrains                                       | 6 (27)  | 1 (11)  | 5 (38)  |
| <b>Risk of Bias Assessment</b> |                                                                   |         |         |         |
|                                | Serious/Critical Bias due to confounding                          | 21 (95) | 9 (100) | 12 (92) |
|                                | Serious/Critical Bias in selection of participants into the study | 3 (14)  | 1 (11)  | 2 (15)  |
|                                | Serious/Critical Bias in classification of exposures              | 16 (73) | 5 (56)  | 11 (85) |
|                                | Serious/Critical Bias due to deviations from exposures            | 7 (32)  | 3 (33)  | 4 (31)  |
|                                | Serious/Critical Bias due to missing data                         | 0 (0)   | 0 (0)   | 0 (0)   |
|                                | Serious/Critical Bias in measurement of outcomes                  | 1 (5)   | 1 (11)  | 0 (0)   |
|                                | Serious/Critical Bias in selection of reported                    | 0 (0)   | 0 (0)   | 0 (0)   |

|  |                                       |         |         |         |
|--|---------------------------------------|---------|---------|---------|
|  | results                               |         |         |         |
|  | Serious/Critical overall risk of bias | 21 (95) | 9 (100) | 12 (92) |

335 <sup>1</sup> Percentages may not add to 100 due to rounding

336 \* Case control studies were not followed up

337 \*\*Any wholegrain foods defined as >25%

338 \*\*\*Individual foods included wholegrain cereal, breakfast cereal, bread & brown rice

339

#### 340 **Risk of bias in included studies**

341 One study<sup>29</sup> was assessed as having an overall moderate risk of bias, four as having a serious  
 342 risk of bias and 17 as having a critical risk of bias (Figure 2). The majority of studies had a critical  
 343 risk of bias in the confounding domain. For example, a confounder was fruit and vegetable  
 344 intake. If this was not appropriately controlled for when assessing the effect of wholegrain  
 345 intake on a cardiovascular disease outcome, the study was rated as having a risk of bias for  
 346 confounding. All but one study was assessed at a low risk of bias on the outcome measurement  
 347 domain. For all domains, except classification of exposure, the risk of bias ratings were similarly  
 348 distributed across industry vs. non-industry sponsored studies (Table 1).

349

#### 350 **Favourable results - Statistical significance: Industry sponsored versus non-industry sponsored**

351 The risk of reporting favourable outcomes was 44% higher in studies with industry sponsorship  
 352 and/or authors with a COI with the food industry RR= 1.44 (95% CI 0.88-2.35). However, the  
 353 confidence interval was wide and included differences in risks that were unimportant or  
 354 operating in the opposite direction as plausible estimates. When we compared only industry

1  
2  
3 355 sponsored (n=5) and non-industry sponsored studies (n=17), the risk was smaller RR = 1.13 (95%  
4  
5  
6 356 CI 0.66-1.94).

7  
8 357

9  
10 358 **Favourable results - Effect size: Industry sponsored versus non-industry sponsored studies**

11  
12  
13 359 There was no difference in the magnitude of RRs (measuring the association between  
14  
15 360 wholegrains and cardiovascular disease outcomes) between studies with industry sponsorship  
16  
17 361 and/or authors with a COI with the food industry RR = 0.77 (95% CI 0.58-1.01) and those studies  
18  
19 362 with no industry sponsorship or author COI RR = 0.85 (95% CI 0.73-1.00) (subgroup test P=0.50,  
20  
21 363 I<sup>2</sup> = 0%) (Figure 3). For studies that had measured the association using hazard ratios there was  
22  
23 364 also no difference found in the magnitude of HRs between studies with industry sponsorship  
24  
25 365 and/or authors with a COI with the food industry HR=0.82 (95% CI 0.76-0.88) and studies with  
26  
27 366 no industry sponsorship or author COI HR=0.86 (95% CI 0.81-0.91) (subgroup test P=0.34, I<sup>2</sup> =  
28  
29 367 0%) (Figure 4).

30  
31 368  
32  
33  
34  
35 369 Our analysis comparing studies with industry sponsorship RR 0.63 (95% CI 0.28-1.39) and those  
36  
37 370 with no industry sponsorship RR 0.85 (95% CI 0.74-0.97) (subgroup test P=0.46, I<sup>2</sup> = 0%), showed  
38  
39 371 no important difference in the magnitude of RRs. This was again comparable between industry  
40  
41 372 sponsored HR 0.82 (95% CI 0.77-0.87) and non-industry sponsored studies HR 0.85 (95% CI 0.81-  
42  
43 373 0.90) (subgroup test P=0.29), I<sup>2</sup>=12.2%) that measured the association using hazard ratios.  
44  
45  
46  
47  
48  
49

50 374  
51  
52  
53  
54  
55

1  
2  
3 376 **Favourable conclusions: Industry sponsored versus non-industry sponsored**  
4

5  
6 377 As there was concordance between the results and conclusions of every included study, the  
7  
8 378 same associations were found for conclusions as for the statistical significance of results. Studies  
9  
10 379 with industry sponsorship and/or authors with a COI with the food industry were more likely to  
11  
12 380 have favourable conclusions compared to those with no industry sponsorship or author COI RR=  
13  
14 381 1.44 (95% CI 0.88-2.35), however the confidence interval was wide. When studies were  
15  
16 382 compared only by industry sponsorship, the risk was again smaller RR = 1.13 (95% CI 0.66-1.94).  
17  
18  
19  
20 383

21  
22  
23 384 **Risk of Bias Assessment by Industry Ties**  
24

25 385 Studies with industry sponsorship and/or authors with a COI with the food industry were less  
26  
27 386 likely (0/9) to have an overall low risk of bias rating compared to those studies with no industry  
28  
29 387 sponsorship or author COI (1/13), RR = 0.47 (95% CI 0.02 -10.32), however there was large  
30  
31 388 uncertainty in the association.  
32  
33  
34

35 389

36  
37 390 **DISCUSSION**  
38

39  
40 391 Observational studies examining the effect of wholegrain consumption on cardiovascular  
41  
42 392 disease outcomes that were sponsored by the food industry and / or had authors with a COI  
43  
44 393 with the food industry more often had favourable results than research not tied to the food  
45  
46 394 industry. However, this finding was inconclusive with respect to the association between  
47  
48 395 industry ties and favorable results, as the relative risk could be as high as 2.35 or as low as 0.88.  
49  
50 396 We found no evidence of a difference in the magnitude of effect between industry sponsored  
51  
52 397 and non-industry sponsored studies. It is difficult to detect differences in effect size by  
53  
54  
55

1  
2  
3 398 sponsorship as many study design features, such as dose and duration of exposures, and specific  
4  
5 399 cardiovascular disease outcomes, vary across studies and may influence the effect size. In  
6  
7  
8 400 previous assessments of drug studies that have demonstrated that industry funded studies are  
9  
10 401 more likely to have results that favour the study sponsors, there was no statistically significant  
11  
12  
13 402 difference found in effect sizes between industry and non-industry sponsored studies.<sup>13</sup>  
14

15 403  
16  
17 404 Although all the included studies had a sponsorship disclosure, almost half were missing  
18  
19 405 disclosures about author COI. Nondisclosed COIs in nutrition research are a concern.<sup>30</sup> Larger  
20  
21 406 samples of industry funded studies and studies with disclosed author COI could make it possible  
22  
23 407 to establish the association of sponsorship with research outcomes.  
24  
25  
26

27 408  
28  
29 409 Studies that were sponsored by the food industry and / or had authors with a COI with the food  
30  
31 410 industry more often had favourable conclusions than studies with no industry ties, although  
32  
33 411 there was uncertainty in this relationship. There was absence of spin in the included studies as  
34  
35 412 all the results agreed with the conclusions.  
36  
37  
38

39 413  
40  
41 414 The overall risk of bias in every study, other than one non-industry sponsored study,<sup>29</sup> was  
42  
43 415 classified as high (meaning either serious or critical). The overall risk of bias rating was based on  
44  
45 416 the domain with the highest risk of bias rating within each study, and most of the studies had a  
46  
47 417 risk of bias related to confounding. Across each domain, we found little difference in the risk of  
48  
49 418 bias between industry sponsored and non-industry sponsored studies.  
50  
51  
52

53  
54 419



### 420 **Strengths and limitations of this review**

421 Our review was registered in PROSPERO.<sup>28</sup> We conducted a comprehensive search and followed  
422 explicit and well-defined inclusion and exclusion criteria for the included studies. Although our  
423 sample was small, we searched several databases and reference lists of included studies.  
424 Authors of the studies for which we required clarification on funding source were also  
425 contacted, but we did not attempt to contact the authors of studies lacking a COI disclosure  
426 statement. Thus, we may be underestimating the number of articles that had authors with  
427 conflicts of interest. Our assessment of risk of bias in the included studies was based on a tool  
428 that is under development, but changes to the tool are unlikely to affect the risk of bias  
429 ratings.<sup>25</sup>

### 431 **Agreements and disagreements with other studies or reviews**

432 The relationship that we identified between food industry sponsorship and authors with a COI  
433 and favourable study outcomes towards the study sponsor has been previously demonstrated in  
434 an assessment of a broad range of nutrition research.<sup>20</sup> Only one study has reported an  
435 association of food industry funding with effect sizes.<sup>31</sup> Of studies examining the association  
436 between soft drink consumption and adverse health outcomes, food industry sponsored studies  
437 reported significantly smaller effects than non-food industry sponsored studies. Compared to  
438 our study, this study examined studies with a homogeneous population of industry funders,  
439 sugar sweetened beverage companies, which may have a more consistent influence on study  
440 outcomes than the diverse pool of food industry sponsors in our study.

1  
2  
3 441 There was also no difference in the level of risk of bias between industry sponsored and non-  
4  
5 442 industry sponsored studies. This is consistent with previous assessments of pharmaceutical,  
6  
7  
8 443 tobacco and nutrition research that has shown industry-sponsored studies are of equal or better  
9  
10 444 quality than non-industry-sponsored studies.<sup>13 20 32-34</sup>

11  
12  
13 445

#### 14 15 446 **Implications for clinicians, policy makers and future research**

16  
17 447 The recent critiques to reform the methods used in the development of dietary guidelines have  
18  
19  
20 448 proposed steps to improve the transparency of how evidence is evaluated and synthesized into  
21  
22  
23 449 recommendations.<sup>1 2</sup> However, until the influence of industry sponsorship in primary nutrition  
24  
25 450 studies has been further explored and measured with larger samples of industry sponsored  
26  
27  
28 451 studies, or studies that have author disclosure statements, this bias may still be unaccounted for  
29  
30 452 in dietary guidelines. Although there was uncertainty around the differences in the results and  
31  
32  
33 453 conclusions that we observed between industry and non-industry studies, the differences are  
34  
35 454 unlikely to be explained by methodological risks of bias in these studies.

36  
37 455

38  
39  
40 456 There are ways that study sponsorship can influence outcomes other than through the design of  
41  
42 457 research. Bias may also be introduced in the way industry sponsored studies code events and  
43  
44  
45 458 analyse data,<sup>35 36</sup> through the selective reporting of study outcomes and through publication  
46  
47 459 bias.<sup>37</sup> It has been demonstrated in other areas of medical research that there is a greater  
48  
49  
50 460 propensity to publish studies with statistically significant results.<sup>38</sup> Therefore, selective  
51  
52 461 publication of study results or studies in their entirety, may limit the availability of all relevant  
53  
54  
55 462 nutrition data and can skew results that are used in dietary guideline development.<sup>39</sup>

1  
2  
3 463 Publication bias could be minimized with the introduction of study registries for nutrition  
4  
5  
6 464 research, as has been established in pharmaceutical research.<sup>40</sup> The association of food  
7  
8 465 industry sponsorship with the reporting of nutrition research still needs to be assessed.  
9

10 466  
11  
12  
13 467 Almost half of the studies included in this review had authors that did not disclose if they had a  
14  
15 468 COI with the food industry or not. Compliance with COI disclosure policies is now well  
16  
17  
18 469 documented across many domains of research.<sup>41-46</sup> Recent examinations of the levels of  
19  
20 470 disclosure in research assessing the effects of artificially sweetened beverages on weight  
21  
22 471 outcomes found similarly poor disclosure rates.<sup>32</sup> Several solutions have been proposed to  
23  
24 472 increase transparency and disclosure rates, including the use of different databases and  
25  
26 473 additional resources to identify conflicted authors, and the introduction of mandatory  
27  
28 474 disclosure requirements in all journals, with the use of penalties for those who do not adhere to  
29  
30  
31  
32 475 the stated policies.<sup>20 32</sup>  
33  
34

35 476  
36  
37 477 **Conclusion**  
38  
39  
40 478 We did not establish that the presence of food industry sponsorship or authors with a COI with  
41  
42 479 the food industry was associated with results or conclusions that favour industry sponsors. The  
43  
44 480 association of food industry sponsorship or authors with a COI with the food industry and  
45  
46 481 favourable results or conclusions is uncertain. However, our analysis was hindered by the low  
47  
48 482 level of COI disclosure in the included studies. This research further strengthens calls for stricter  
49  
50 483 policies relating to the disclosure and management of conflicts of interest in nutrition research.  
51  
52  
53  
54  
55

1  
2  
3  
4  
5  
6  
7  
8  
9  
10  
11  
12  
13  
14  
15  
16  
17  
18  
19  
20  
21  
22  
23  
24  
25  
26  
27  
28  
29  
30  
31  
32  
33  
34  
35  
36  
37  
38  
39  
40  
41  
42  
43  
44  
45  
46  
47  
48  
49  
50  
51  
52  
53  
54  
55  
56  
57  
58  
59  
60

484 Without such disclosures, it will not be possible to determine if the results of nutrition research  
485 are free of food industry influences and potential biases.

486

For peer review only

1  
2  
3 488 **Figure 1. Study Flow Diagram**  
4

5 489 **Figure 2. Risk of Bias of Included Studies**  
6

7  
8 490 **Figure 3: Effect Size - Industry sponsored &/OR author COI versus non-industry sponsored &**  
9  
10 491 **no author COI studies, Risk Ratio**  
11

12 492 **Figure 4: Effect Size - Industry sponsored &/OR author COI versus non-industry sponsored &**  
13  
14 493 **no author COI studies, Hazard Ratio**  
15  
16  
17  
18  
19  
20  
21  
22  
23  
24  
25  
26  
27  
28  
29  
30  
31  
32  
33  
34  
35  
36  
37  
38  
39  
40  
41  
42  
43  
44  
45  
46  
47  
48  
49  
50  
51  
52  
53  
54  
55

495 **References**

- 496 1. National Academies of Sciences, Engineering, and Medicine. Redesigning the process for establishing  
497 the dietary guidelines for Americans 2017 [Available from:  
498 [https://www.nap.edu/catalog/24883/redesigning-the-process-for-establishing-the-dietary-](https://www.nap.edu/catalog/24883/redesigning-the-process-for-establishing-the-dietary-guidelines-for-americans)  
499 [guidelines-for-americans](https://www.nap.edu/catalog/24883/redesigning-the-process-for-establishing-the-dietary-guidelines-for-americans) (accessed Nov 2017)].
- 500 2. National Academies of Sciences, Engineering, and Medicine. Optimizing the process for establishing  
501 the Dietary Guidelines for Americans: the selection process 2017 [Available from:  
502 [https://www.nap.edu/catalog/24637/optimizing-the-process-for-establishing-the-dietary-](https://www.nap.edu/catalog/24637/optimizing-the-process-for-establishing-the-dietary-guidelines-for-americans)  
503 [guidelines-for-americans](https://www.nap.edu/catalog/24637/optimizing-the-process-for-establishing-the-dietary-guidelines-for-americans) (accessed Nov 2017)].
- 504 3. Bero L. Developing reliable dietary guidelines. *BMJ* 2017;359 doi: 10.1136/bmj.j4845
- 505 4. U.S. Department of Health and Human Services and U.S. Department of Agriculture. 2015 – 2020  
506 Dietary Guidelines for Americans. 8th Edition December 2015 [Available from:  
507 <https://health.gov/dietaryguidelines/2015/guidelines/>(accessed Dec 2017)].
- 508 5. National Health and Medical Research Council: Department of Health and Ageing. Australian Dietary  
509 Guidelines. Canberra, Commonwealth of Australia: NHMRC, 2013.
- 510 6. Public Health England. The Eatwell Guide 2017 [December 4, 2017]. Available from:  
511 <https://www.gov.uk/government/publications/the-eatwell-guide>.
- 512 7. Aune D, Keum N, Giovannucci E, et al. Whole grain consumption and risk of cardiovascular disease,  
513 cancer, and all cause and cause specific mortality: systematic review and dose-response meta-  
514 analysis of prospective studies. *BMJ* 2016;353 doi: 10.1136/bmj.i2716
- 515 8. Benisi-Kohansal S, Saneei P, Salehi-Marzjarani M, et al. Whole-Grain Intake and Mortality from All  
516 Causes, Cardiovascular Disease, and Cancer: A Systematic Review and Dose-Response Meta-  
517 Analysis of Prospective Cohort Studies. *Advances in Nutrition: An International Review Journal*  
518 2016;7(6):1052-65. doi: 10.3945/an.115.011635
- 519 9. Zhang B, Zhao Q, Guo W, et al. Association of whole grain intake with all-cause, cardiovascular, and  
520 cancer mortality: a systematic review and dose-response meta-analysis from prospective cohort  
521 studies. *Eur J Clin Nutr* 2017 doi: 10.1038/ejcn.2017.149
- 522 10. Kelly SAM, Hartley L, Loveman E, et al. Whole grain cereals for the primary or secondary prevention  
523 of cardiovascular disease. *Cochrane Database of Systematic Reviews* 2017(8) doi:  
524 10.1002/14651858.CD005051.pub3
- 525 11. Jacobs Jr DR, Meyer KA, Kushi LH, et al. Whole-grain intake may reduce the risk of ischemic heart  
526 disease death in postmenopausal women: The Iowa women's health study. *American Journal of*  
527 *Clinical Nutrition* 1998;68(2):248-57.
- 528 12. Blake P, Durao S, Naude CE, et al. An analysis of methods used to synthesize evidence and grade  
529 recommendations in food-based dietary guidelines. *Nutr Rev* 2018 doi: 10.1093/nutrit/nux074  
530 [published Online First: 2018/02/10]
- 531 13. Lundh A, Lexchin J, Mintzes B, et al. Industry sponsorship and research outcome. *The Cochrane*  
532 *database of systematic reviews* 2017;2:Mr000033. doi: 10.1002/14651858.MR000033.pub3  
533 [published Online First: 2017/02/17]
- 534 14. Huss A, Egger M, Hug K, et al. Source of funding and results of studies of health effects of mobile  
535 phone use: systematic review of experimental studies. *Ciencia & saude coletiva* 2008;13(3):1005-  
536 12. [published Online First: 2008/09/25]
- 537 15. Barnes DE, Bero LA. Why review articles on the health effects of passive smoking reach different  
538 conclusions. *Jama* 1998;279(19):1566-70.
- 539 16. Lexchin J. Those who have the gold make the evidence: how the pharmaceutical industry biases the  
540 outcomes of clinical trials of medications. *Science & Engineering Ethics*;18(2):247-61.

- 1  
2  
3 541 17. Sismondo S. How pharmaceutical industry funding affects trial outcomes: causal structures and  
4 542 responses. *Social science & medicine* (1982) 2008;66(9):1909-14. doi:  
5 543 10.1016/j.socscimed.2008.01.010 [published Online First: 2008/02/27]  
6 544 18. Boutron I, Dutton S, Ravaud P, et al. Reporting and interpretation of randomized controlled trials  
7 545 with statistically nonsignificant results for primary outcomes. *Jama* 2010;303(20):2058-64. doi:  
8 546 10.1001/jama.2010.651 [published Online First: 2010/05/27]  
9 547 19. Odierna DH, Forsyth SR, White J, et al. The cycle of bias in health research: a framework and toolbox  
10 548 for critical appraisal training. *Accountability in research* 2013;20(2):127-41. doi:  
11 549 10.1080/08989621.2013.768931 [published Online First: 2013/02/26]  
12 550 20. Chartres N, Fabbri A, Bero LA. Association of industry sponsorship with outcomes of nutrition studies:  
13 551 A systematic review and meta-analysis. *JAMA Internal Medicine* 2016;176(12):1769-77. doi:  
14 552 10.1001/jamainternmed.2016.6721  
15 553 21. Diels J, Cunha M, Manaia C, et al. Association of financial or professional conflict of interest to  
16 554 research outcomes on health risks or nutritional assessment studies of genetically modified  
17 555 products. *Food Policy* 2011;36(2):197-203. doi: 10.1016/j.foodpol.2010.11.016  
18 556 22. Dietitians Association of Australia. A review of the evidence to address targeted questions to inform  
19 557 the revision of the Australian dietary guidelines 2009: Process Manual, 2011.  
20 558 23. Harris PA, Taylor R, Thielke R, et al. Research Electronic Data Capture (REDCap) - A metadata-driven  
21 559 methodology and workflow process for providing translational research informatics support.  
22 560 *Journal of biomedical informatics* 2009;42(2):377-81. doi: 10.1016/j.jbi.2008.08.010  
23 561 24. Holmberg S, Thelin A, Stiernstrom EL. Food choices and coronary heart disease: a population based  
24 562 cohort study of rural Swedish men with 12 years of follow-up. *International Journal of*  
25 563 *Environmental Research & Public Health [Electronic Resource]* 2009;6(10):2626-38.  
26 564 25. Sterne JA, Hernán MA, Reeves BC, et al. ROBINS-I: a tool for assessing risk of bias in non-randomised  
27 565 studies of interventions. *BMJ* 2016;355 doi: 10.1136/bmj.i4919  
28 566 26. Higgins JPT, Thompson SG, Deeks JJ, et al. Measuring inconsistency in meta-analyses. *BMJ*  
29 567 2003;327(7414):557-60. doi: 10.1136/bmj.327.7414.557  
30 568 27. Version 5.3 [program]. Copenhagen: The Nordic Cochrane Centre, The Cochrane Collaboration, 2014.  
31 569 28. National Institute for Health Research. International Prospective Register for Systematic Reviews  
32 570 [Internet]. 2015 [Available from: <http://www.crd.york.ac.uk/PROSPERO/> accessed 11/03 2015.  
33 571 29. Wu H, Flint AJ, Qi Q, et al. Association between dietary whole grain intake and risk of mortality: two  
34 572 large prospective studies in US men and women. *JAMA Internal Medicine* 2015;175(3):373-84.  
35 573 doi: 10.1001/jamainternmed.2014.6283  
36 574 30. Nestle M. Corporate Funding of Food and Nutrition Research: Science or Marketing? *JAMA Intern*  
37 575 *Med* 2016;176(1):13-4. doi: 10.1001/jamainternmed.2015.6667 [published Online First:  
38 576 2015/11/26]  
39 577 31. Vartanian LR, Schwartz MB, Brownell KD. Effects of soft drink consumption on nutrition and health: a  
40 578 systematic review and meta-analysis. *American journal of public health* 2007;97(4):667-75. doi:  
41 579 10.2105/ajph.2005.083782 [published Online First: 2007/03/03]  
42 580 32. Mandrioli D, Kearns CE, Bero LA. Relationship between Research Outcomes and Risk of Bias, Study  
43 581 Sponsorship, and Author Financial Conflicts of Interest in Reviews of the Effects of Artificially  
44 582 Sweetened Beverages on Weight Outcomes: A Systematic Review of Reviews. *PloS one*  
45 583 2016;11(9):e0162198. doi: 10.1371/journal.pone.0162198  
46 584 33. Barnes DE, Bero LA. Industry-funded research and conflict of interest: an analysis of research  
47 585 sponsored by the tobacco industry through the Center for Indoor Air Research. *Journal of Health*  
48 586 *Politics, Policy & Law* 1996;21(3):515-42.

- 1  
2  
3 587 34. Cho MK, Bero LA. The quality of drug studies published in symposium proceedings. *Ann Intern Med*  
4 588 1996;124(5):485-9. [published Online First: 1996/03/01]  
5 589 35. Psaty BM, Prentice RL. Minimizing bias in randomized trials: the importance of blinding. *Jama*  
6 590 2010;304(7):793-4. doi: 10.1001/jama.2010.1161 [published Online First: 2010/08/19]  
7 591 36. Psaty BM, Kronmal RA. Reporting mortality findings in trials of rofecoxib for Alzheimer disease or  
8 592 cognitive impairment: a case study based on documents from rofecoxib litigation. *Jama*  
9 593 2008;299(15):1813-7. doi: 10.1001/jama.299.15.1813 [published Online First: 2008/04/17]  
10 594 37. Hart B, Lundh A, Bero L. Effect of reporting bias on meta-analyses of drug trials: reanalysis of meta-  
11 595 analyses. *British Medical Journal* 2012;344 doi: 10.1136/bmj.d7202  
12 596 38. Hopewell S, Loudon K, Clarke MJ, et al. Publication bias in clinical trials due to statistical significance  
13 597 or direction of trial results. *The Cochrane database of systematic reviews* 2009(1):Mr000006. doi:  
14 598 10.1002/14651858.MR000006.pub3 [published Online First: 2009/01/23]  
15 599 39. Misakian AL, Bero LA. Publication bias and research on passive smoking: comparison of published and  
16 600 unpublished studies. *JAMA* 1998;280(3):250-3.  
17 601 40. Dickersin K, Rennie D. The evolution of trial registries and their use to assess the clinical trial  
18 602 enterprise. *Jama* 2012;307(17):1861-4. doi: 10.1001/jama.2012.4230 [published Online First:  
19 603 2012/05/03]  
20 604 41. Forsyth SR, Odierna DH, Krauth D, et al. Conflicts of interest and critiques of the use of systematic  
21 605 reviews in policymaking: an analysis of opinion articles. *Systematic reviews* 2014;3:122. doi:  
22 606 10.1186/2046-4053-3-122 [published Online First: 2014/11/25]  
23 607 42. Ruff K. Scientific journals and conflict of interest disclosure: what progress has been made?  
24 608 *Environmental health : a global access science source* 2015;14:45. doi: 10.1186/s12940-015-  
25 609 0035-6 [published Online First: 2015/05/31]  
26 610 43. Resnik DB. Science and money: problems and solutions. *Journal of microbiology & biology education*  
27 611 2014;15(2):159-61. doi: 10.1128/jmbe.v15i2.792 [published Online First: 2015/01/13]  
28 612 44. Roseman M, Milette K, Bero LA, et al. Reporting of conflicts of interest in meta-analyses of trials of  
29 613 pharmacological treatments. *Jama* 2011;305(10):1008-17. doi: 10.1001/jama.2011.257  
30 614 [published Online First: 2011/03/10]  
31 615 45. Bero L. Addressing bias and conflict of interest among biomedical researchers. *JAMA*  
32 616 2017;317(17):1723-24. doi: 10.1001/jama.2017.3854  
33 617 46. Grundy Q, Dunn AG, Bourgeois FT, et al. Prevalence of disclosed conflicts of interest in biomedical  
34 618 research and associations with journal impact factors and altmetric scores. *JAMA*  
35 619 2018;319(4):408-09. doi: 10.1001/jama.2017.20738  
36  
37  
38  
39  
40  
41 620  
42  
43  
44  
45  
46  
47  
48  
49  
50  
51  
52  
53  
54  
55  
56  
57  
58  
59  
60



1  
2  
3 622 **Contributors:** NC, AF, SMc, MA-F and LB designed and wrote the review protocol. NC wrote the  
4  
5  
6 623 search strategy and undertook the literature search. NC, SMc and JT conducted the title and  
7  
8 624 abstract screening and full article screening for final study inclusion. NC, SMc and JT conducted  
9  
10 625 data collection and cleaning, LB supervised. NC and JMc undertook all data analysis. LB advised  
11  
12 626 on methods, statistical analyses, and interpretation of findings. All authors contributed to the  
13  
14  
15 627 final manuscript. NC and LB are guarantors.

16  
17  
18 628 **Acknowledgement:** We thank Matthew Page, Monash University for answering specific  
19  
20  
21 629 statistical questions.

22  
23  
24 630 **Funding:** This work was funded by National Health and Medical Research Council Grant  
25  
26  
27 631 #APP1139997. Nicholas Chartres is a recipient of the James Millner PhD Scholarship in Pharmacy  
28  
29 632 from the University of Sydney. Sally McDonald is a scholarship recipient (Charles Perkins Centre  
30  
31 633 summer scholarship) from the University of Sydney. Jessica Turton is a scholarship recipient  
32  
33  
34 634 (Charles Perkins Centre summer scholarship) from the University of Sydney.

35  
36  
37 635 **Competing interests:** All authors have completed the ICMJE uniform disclosure form at  
38  
39  
40 636 [http://www.icmje.org/coi\\_disclosure.pdf](http://www.icmje.org/coi_disclosure.pdf). No support was received from any organisation for  
41  
42 637 the submitted work. The authors have no financial relationships with any organisations that  
43  
44  
45 638 might have an interest in the submitted work in the previous three years. The authors report no  
46  
47 639 other relationships or activities that could appear to have influenced the submitted work.

48  
49  
50 640 **Ethical Approval:** Not required  
51  
52  
53  
54  
55

1  
2  
3 641 **Transparency declaration:** The authors affirm that this manuscript is a honest, accurate, and  
4  
5 642 transparent account of the study being reported, that no important aspects of the study have  
6  
7  
8 643 been omitted and that any discrepancies from the study as planned have been explained.  
9  
10  
11 644 The Corresponding Author has the right to grant on behalf of all authors and does grant on  
12  
13 645 behalf of all authors, a worldwide licence to the Publishers and its licensees in perpetuity, in all  
14  
15 646 forms, formats and media (whether known now or created in the future), to i) publish,  
16  
17 647 reproduce, distribute, display and store the Contribution, ii) translate the Contribution into  
18  
19 648 other languages, create adaptations, reprints, include within collections and create summaries,  
20  
21 649 extracts and/or, abstracts of the Contribution, iii) create any other derivative work(s) based on  
22  
23 650 the Contribution, iv) to exploit all subsidiary rights in the Contribution, v) the inclusion of  
24  
25 651 electronic links from the Contribution to third party material where-ever it may be located; and,  
26  
27 652 vi) licence any third party to do any or all of the above.  
28  
29  
30  
31  
32  
33  
34 653 **Data Sharing:** Available from The University of Sydney data repository. DOI to be determined.  
35  
36  
37  
38  
39  
40  
41  
42  
43  
44  
45  
46  
47  
48  
49  
50  
51  
52  
53  
54  
55  
56  
57  
58  
59  
60

Figure 1. Study Flow Diagram

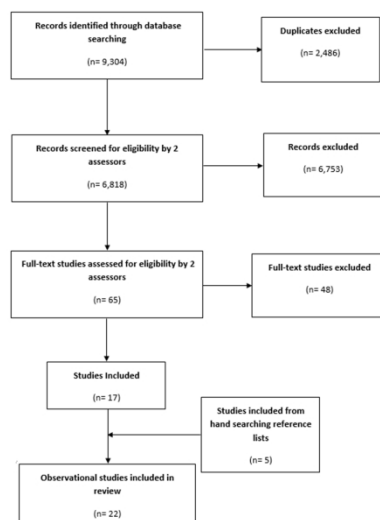

Figure 1. Study Flow Diagram

338x190mm (300 x 300 DPI)

1  
2  
3  
4  
5  
6  
7  
8  
9  
10  
11  
12  
13  
14  
15  
16  
17  
18  
19  
20  
21  
22  
23  
24  
25  
26  
27  
28  
29  
30  
31  
32  
33  
34  
35  
36  
37  
38  
39  
40  
41  
42  
43  
44  
45  
46  
47  
48  
49  
50  
51  
52  
53  
54  
55  
56  
57  
58  
59  
60



Figure 2. Risk of Bias Table  
338x190mm (300 x 300 DPI)

Figure 3: Effect Size - Industry Sponsored &/OR Author COI versus Non-Industry Sponsored & No Author COI, RR

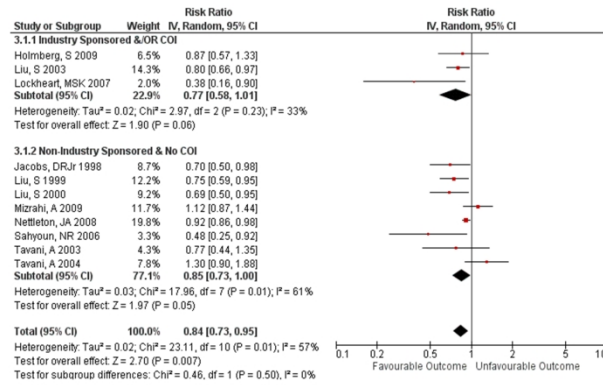

Figure 3. Effect Size - Industry sponsored &/OR author COI versus non-industry sponsored & no author COI studies, Risk Ratio

338x190mm (300 x 300 DPI)

Figure 4: Effect Size - Industry Sponsored &/OR Author COI versus Non-Industry Sponsored & No Author COI, HR



Figure 4: Effect Size - Industry sponsored &/OR author COI versus non-industry sponsored & no author COI studies, Hazard Ratio

338x190mm (300 x 300 DPI)

1  
2  
3 **1 Supplementary File 1: Search Strategy**  
4

5  
6 2 OVID Medline: wholegrain & CVD  
7

8  
9 3

10  
11 4 1. Randomized controlled trial\*.sh.  
12

13  
14 5 2. experimental design.tw.  
15

16  
17 6 3. intervention\*.tw.  
18

19  
20 7 4. (RCT\* or rct\*).tw.  
21

22  
23 8 5. random\* control\* trial\*.tw.  
24

25  
26 9 6. clinical trial\*.sh.  
27

28  
29 10 7. field trial\*.tw.  
30

31  
32 11 8. community trial\*.tw.  
33

34  
35 12 9. controlled clinical trial\*.tw.  
36

37  
38 13 10. pragmatic trial\*.tw.  
39

40  
41 14 11. observational study.sh.  
42

43  
44 15 12. cohort study.tw.  
45

46  
47 16 13. prospective cohort\*.tw.  
48

49  
50 17 14. retrospective cohort\*.tw.  
51

52  
53 18 15. case control\*.sh.  
54

55  
56 19 16. ecological study.tw.  
57

58  
59 20 17. time series analys?s.tw.  
60

21 18. before-after study.tw.

22 19. pre-post study.tw.

- 1  
2  
3 23 20. follow up stud\*.sh.  
4  
5  
6 24 21. comparative stud\*.sh.  
7  
8 25 22. evaluation stud\*.sh.  
9  
10  
11 26 23. 1 or 2 or 3 or 4 or 5 or 6 or 7 or 8 or 9 or 10 or 11 or 12 or 13 or 14 or 15 or 16 or 17 or 18 or 19 or 20  
12 27 or 21 or 22  
13  
14  
15 28 24. Edible Grain/ae, me [Adverse Effects, Metabolism]  
16  
17 29 25. grain\*.tw.  
18  
19  
20 30 26. Dietary Carbohydrates/ or Edible Grain/ or Bread/ or Dietary Fiber/  
21  
22 31 27. whole grain\*.tw.  
23  
24  
25 32 28. partially processed grains.tw.  
26  
27 33 29. whole wheat.tw.  
28  
29  
30 34 30. wholemeal.tw.  
31  
32 35 31. rice\*.tw.  
33  
34  
35 36 32. oat\*.tw.  
36  
37 37 33. barley\*.tw.  
38  
39  
40 38 34. wheat\*.tw.  
41  
42 39 35. Amaranthus/ae, me [Adverse Effects, Metabolism]  
43  
44  
45 40 36. amaranth.tw.  
46  
47 41 37. Millets/me [Metabolism]  
48  
49  
50 42 38. millet\*.tw.  
51  
52 43 39. Sorghum/me [Metabolism]  
53  
54  
55 44 40. sorghum\*.tw.  
56  
57  
58  
59  
60



- 1  
2  
3 45 41. maize\*.tw.  
4  
5 46 42. spelt\*.tw.  
6  
7  
8 47 43. buckwheat\*.tw.  
9  
10 48 44. Triticale/me [Metabolism]  
11  
12  
13 49 45. triticale\*.tw.  
14  
15 50 46. fonio\*.tw.  
16  
17  
18 51 47. emmer.tw.  
19  
20 52 48. einkorn\*.tw.  
21  
22  
23 53 49. kamut\*.tw.  
24  
25 54 50. canary seed\*.tw.  
26  
27  
28 55 51. Bread/ae, an, me [Adverse Effects, Analysis, Metabolism]  
29  
30 56 52. bread\*.tw.  
31  
32  
33 57 53. breakfast cereal\*.tw.  
34  
35 58 54. pasta\*.tw.  
36  
37  
38 59 55. noodle\*.tw.  
39  
40 60 56. Flour/ae, an, st [Adverse Effects, Analysis, Standards]  
41  
42  
43 61 57. flour\*.tw.  
44  
45 62 58. polenta\*.tw.  
46  
47  
48 63 59. semolina\*.tw.  
49  
50 64 60. bran.tw.  
51  
52  
53 65 61. corn.tw.  
54  
55 66 62. wheat germ\*.tw.  
56  
57  
58  
59  
60

- 1  
2  
3 67 63. corn cake\*.tw.  
4  
5 68 64. scone\*.tw.  
6  
7  
8 69 65. couscous.tw.  
9  
10  
11 70 66. crumpet\*.tw.  
12  
13 71 67. dietary fiber.tw.  
14  
15 72 68. dietary carbohydrate\*.tw.  
16  
17  
18 73 69. glycemic index.tw.  
19  
20  
21 74 70. 24 or 25 or 26 or 27 or 28 or 29 or 30 or 31 or 32 or 33 or 34 or 35 or 36 or 37 or 38 or 39 or 40 or 41  
22 75 or 42 or 43 or 44 or 45 or 46 or 47 or 48 or 49 or 50 or 51 or 52 or 53 or 54 or 55 or 56 or 57 or 58 or 59  
23 76 or 60 or 61 or 62 or 64 or 65 or 66 or 67 or 68 or 69  
24  
25  
26 77 71. Coronary Disease/ or Cardiovascular Diseases/ or Hypertension/ or Atherosclerosis/  
27  
28  
29 78 72. cardiovascular disease\*.tw.  
30  
31 79 73. coronary\*.tw.  
32  
33  
34 80 74. heart\*.tw.  
35  
36 81 75. cardia\*.tw.  
37  
38  
39 82 76. myocard\*.tw.  
40  
41 83 77. isch?em\*.tw.  
42  
43  
44 84 78. angina\*.tw.  
45  
46 85 79. ventric\*.tw.  
47  
48  
49 86 80. tachycardi\*.tw.  
50  
51 87 81. pericard\*.tw.  
52  
53  
54 88 82. endocardi\*.tw.  
55  
56  
57  
58  
59  
60

- 1  
2  
3 89 83. atrial fibrillat\*.tw.  
4  
5 90 84. arrhythmi\*.tw.  
6  
7  
8 91 85. athero\*.tw.  
9  
10 92 86. arterio\*.tw.  
11  
12  
13 93 87. HDL.tw.  
14  
15 94 88. LDL.tw.  
16  
17  
18 95 89. VLDL.tw.  
19  
20 96 90. lipid\*.tw.  
21  
22  
23 97 91. lipoprotein\*.tw.  
24  
25  
26 98 92. triacylglycerol\*.tw.  
27  
28 99 93. hyperlipid\*.tw.  
29  
30 100 94. hypercholesterol\*.tw.  
31  
32  
33 101 95. hypercholester?emia\*.tw.  
34  
35  
36 102 96. hypertriglycerid?emia\*.tw.  
37  
38 103 97. Cholesterol/  
39  
40  
41 104 98. Stroke/  
42  
43 105 99. Cerebrovascular Disorders/  
44  
45  
46 106 100. vascular accident\*.tw.  
47  
48  
49 107 101. TIA.tw.  
50  
51 108 102. Thrombosis/  
52  
53 109 103. thrombosis.tw.  
54  
55  
56 110 104. Embolism/ or Pulmonary Embolism/  
57  
58  
59  
60

- 1  
2  
3 111 105. apoplexy.tw.  
4  
5  
6 112 106. (brain adj2 accident\*).tw.  
7  
8 113 107. ((brain\* or cerebral or lacunar) adj2 infarct\*).tw.  
9  
10  
11 114 108. Blood Pressure/ or Hypertension/  
12  
13 115 109. systolic blood pressure.tw.  
14  
15  
16 116 110. diastolic blood pressure.tw.  
17  
18 117 111. Peripheral Vascular Diseases/ or Peripheral Arterial Disease/  
19  
20  
21 118 112. (coronar\$ adj5 (bypas\$ or graft\$ or disease\$ or event\$)).tw.  
22  
23 119 113. (cerebrovasc\$ or cardiovasc\$ or mortal\$ or angina\$ or stroke or strokes).tw.  
24  
25  
26 120 114. (myocardi\$ adj5 (infarct\$ or revascular\$ or ischaemi\$ or ischemi\$)).tw.  
27  
28 121 115. (morbid\$ adj5 (heart\$ or coronar\$ or ischaem\$ or ischem\$ or myocard\$)).tw.  
29  
30  
31 122 116. (vascular\$ adj5 (peripheral\$ or disease\$ or complication\$)).tw.  
32  
33 123 117. (heart\$ adj5 (disease\$ or attack\$ or bypass\$)).tw.  
34  
35  
36 124 118. Mortality/  
37  
38 125 119. mortality.tw.  
39  
40  
41 126 120. Diabetes Mellitus, Type 2/  
42  
43 127 121. Hyperglycemia/  
44  
45  
46 128 122. hyperglycemi\*.tw.  
47  
48 129 123. (glucose adj2 intoleran\*).tw.  
49  
50  
51 130 124. Insulin Resistance/  
52  
53 131 125. (metabolic adj3 syndrome adj3 x).tw.  
54  
55  
56 132 126. metabolic cardiovascular syndrome.tw.  
57  
58  
59  
60

1  
2  
3 133 127. dysmetabolic syndrome x.tw.  
4

5  
6 134 128. HbA1c.tw.  
7

8 135 129. (glyc?emic adj3 control).tw.  
9

10 136 130. 71 or 72 or 73 or 74 or 75 or 76 or 77 or 78 or 79 or 80 or 81 or 82 or 83 or 84 or 85 or 86 or 87 or

11  
12 137 88 or 89 or 90 or 91 or 92 or 93 or 94 or 95 or 96 or 97 or 98 or 99 or 100 or 101 or 102 or 103 or 104 or

13  
14 138 105 or 106 or 107 or 108 or 109 or 110 or 111 or 112 or 113 or 114 or 115 or 116 or 117 or 118 or 119 or

15  
16 139 120 or 121 or 122 or 123 or 124 or 125 or 126 or 127 or 128 or 129  
17

18 140 131. 23 and 70 and 130  
19

20 141 132. limit 131 to (humans and yr="1997 -Current")  
21  
22  
23  
24  
25  
26  
27  
28  
29  
30  
31  
32  
33  
34  
35  
36  
37  
38  
39  
40  
41  
42  
43  
44  
45  
46  
47  
48  
49  
50  
51  
52  
53  
54  
55  
56  
57  
58  
59  
60

## PROSPERO International prospective register of systematic reviews

### Review title and timescale

- 1 Review title  
Give the working title of the review. This must be in English. Ideally it should state succinctly the interventions or exposures being reviewed and the associated health or social problem being addressed in the review.  
**The association of industry sponsorship with outcomes of studies examining the effect of intake of wholegrain foods with cardiovascular disease and mortality: protocol**
- 2 Original language title  
For reviews in languages other than English, this field should be used to enter the title in the language of the review. This will be displayed together with the English language title.
- 3 Anticipated or actual start date  
Give the date when the systematic review commenced, or is expected to commence.  
**28/11/2016**
- 4 Anticipated completion date  
Give the date by which the review is expected to be completed.  
**31/05/2017**
- 5 Stage of review at time of this submission  
Indicate the stage of progress of the review by ticking the relevant boxes. Reviews that have progressed beyond the point of completing data extraction at the time of initial registration are not eligible for inclusion in PROSPERO. This field should be updated when any amendments are made to a published record.
- The review has not yet started
- | Review stage                                                    | Started | Completed |
|-----------------------------------------------------------------|---------|-----------|
| Preliminary searches                                            | No      | Yes       |
| Piloting of the study selection process                         | No      | Yes       |
| Formal screening of search results against eligibility criteria | No      | Yes       |
| Data extraction                                                 | Yes     | No        |
| Risk of bias (quality) assessment                               | Yes     | No        |
| Data analysis                                                   | No      | No        |
- Provide any other relevant information about the stage of the review here.

### Review team details

- 6 Named contact  
The named contact acts as the guarantor for the accuracy of the information presented in the register record.  
**Mr Chartres**
- 7 Named contact email  
Enter the electronic mail address of the named contact.  
**ngar0960@uni.sydney.edu.au**
- 8 Named contact address  
Enter the full postal address for the named contact.  
**THE UNIVERSITY OF SYDNEY D17, The Hub, 6th floor, Charles Perkins Centre| The University of Sydney | NSW | 2006**
- 9 Named contact phone number  
Enter the telephone number for the named contact, including international dialing code.  
**02 8627 4328**
- 10 Organisational affiliation of the review  
Full title of the organisational affiliations for this review, and website address if available. This field may be completed

as 'None' if the review is not affiliated to any organisation.

THE UNIVERSITY OF SYDNEY

Website address:

sydney.edu.au

#### 11 Review team members and their organisational affiliations

Give the title, first name and last name of all members of the team working directly on the review. Give the organisational affiliations of each member of the review team.

| Title     | First name | Last name        | Affiliation                                                               |
|-----------|------------|------------------|---------------------------------------------------------------------------|
| Mr        | Nicholas   | Chartres         | The Hub, 6th floor, Charles Perkins Centre, The University of Sydney      |
| Dr        | Alice      | Fabbri           | The Hub, 6th floor, Charles Perkins Centre, The University of Sydney      |
| Miss      | Sally      | McDonald         | The Hub, 6th floor, Charles Perkins Centre, The University of Sydney      |
| Miss      | Jessica    | Turton           | The Hub, 6th floor, Charles Perkins Centre, The University of Sydney      |
| Professor | Margaret   | Allman-Farinelli | Charles Perkins Centre, The University of Sydney                          |
| Professor | Lisa       | Bero             | D17, The Hub, 6th floor, Charles Perkins Centre, The University of Sydney |

#### 12 Funding sources/sponsors

Give details of the individuals, organizations, groups or other legal entities who take responsibility for initiating, managing, sponsoring and/or financing the review. Any unique identification numbers assigned to the review by the individuals or bodies listed should be included.

Nicholas Chartres is a scholarship recipient (James Milner PhD scholarship in Pharmacy) from the University of Sydney. Alice Fabbri is a PhD student. She is recipient of a scholarship from the Italian Ministry of Education, Universities and Research. Sally McDonald is a scholarship recipient (Charles Perkins Centre summer scholarship) from the University of Sydney. Jessica Turton is a scholarship recipient (Charles Perkins Centre summer scholarship) from the University of Sydney.

#### 13 Conflicts of interest

List any conditions that could lead to actual or perceived undue influence on judgements concerning the main topic investigated in the review.

Are there any actual or potential conflicts of interest?

None known

#### 14 Collaborators

Give the name, affiliation and role of any individuals or organisations who are working on the review but who are not listed as review team members.

| Title | First name | Last name | Organisation details |
|-------|------------|-----------|----------------------|
|-------|------------|-----------|----------------------|

### Review methods

#### 15 Review question(s)

State the question(s) to be addressed / review objectives. Please complete a separate box for each question.

The objective of this study is to determine if the presence of food industry sponsorship in primary nutrition studies examining the association of wholegrain foods with cardiovascular outcomes is associated with effect sizes, statistical significance of results and/ or conclusions that are favorable to the sponsor.

We will also determine whether industry sponsored primary nutrition studies assessing the association of wholegrain foods with cardiovascular outcomes differ in their risk of bias compared with studies with no or other sources of sponsorship.

#### 16 Searches

Give details of the sources to be searched, and any restrictions (e.g. language or publication period). The full search strategy is not required, but may be supplied as a link or attachment.

We will search the following databases from 1997-2016: Ovid MEDLINE; CINAHL; PubMed; PreMEDLINE; Cochrane Library; PsycINFO; Science Direct; and ERIC.

17 URL to search strategy

If you have one, give the link to your search strategy here. Alternatively you can e-mail this to PROSPERO and we will store and link to it.

I give permission for this file to be made publicly available

No

18 Condition or domain being studied

Give a short description of the disease, condition or healthcare domain being studied. This could include health and wellbeing outcomes.

public health - nutrition

19 Participants/population

Give summary criteria for the participants or populations being studied by the review. The preferred format includes details of both inclusion and exclusion criteria.

studies of adults and / or children were eligible for inclusion Inclusion Criteria • The study quantitatively measure the effects of wholegrain consumption in humans • The study involves or considers research with healthy children and/or adults with BMI 25% wholegrain, which may be whole, partially processed, ground or milled grain products in which every part of the grain is present in proportions that represent those present in the whole grain • The study has an outcome measure related to cardiovascular disease. • The study evaluates clinical outcomes (e.g. risk ratio/hazard ratio/odds ratio (RR/HR/OR) of cardiovascular mortality, nonfatal heart attack, stroke, etc.) and/or the surrogate outcomes of Blood Pressure (mmHg), LDL cholesterol, or HbA1c. • If the study examines mixed interventions (e.g. nutritional and educational) we will include them only if data related to wholegrain consumption are reported separately or can be obtained from the authors • In case of multiple reports from the same study, we will use the most complete and/or recently reported data Exclusion Criteria • Cross sectional studies, reviews and meta-analysis, commentaries. • The study examines dietary patterns only (e.g. the "Mediterranean diet") • The study examines nutrients in an altered state (i.e. cereal fibre supplements or bran fortification) • The study examines total grain intake without differentiating between wholegrains and refined grains, or includes significant refined grain products in the wholegrain category. • The study examines only refined grain products, including cereal products containing high added fat or sugar (e.g. cakes, biscuits, pastries). • The study examines intake of supplemented or enriched foods (e.g. with the addition of bran) and not intake of wholegrain foods.

21 Comparator(s)/control

Where relevant, give details of the alternatives against which the main subject/topic of the review will be compared (e.g. another intervention or a non-exposed control group).

Wholegrain vs Wholegrain (different doses) Wholegrain vs Wholegrain (different grains) Wholegrain vs no Wholegrain Wholegrain vs Refined grain Wholegrain vs Other food Other (mixed intervention)

22 Types of study to be included

Give details of the study designs to be included in the review. If there are no restrictions on the types of study design eligible for inclusion, this should be stated.

Inclusion: RCT/ cluster RCT Controlled Trial/ pseudo-randomized Cohort Case-control Pre/Post Exclusion: Cross sectional studies reviews and meta-analysis commentaries.

23 Context

Give summary details of the setting and other relevant characteristics which help define the inclusion or exclusion criteria.

24 Primary outcome(s)

Give the most important outcomes.

a. Primary Outcome 1 and 2 (Results and effect size) - Statistical significance of results - Effect size of outcomes b. Primary Outcome 3 (Conclusions) For this study, we will use clinical outcomes only for observational studies and both clinical and surrogate outcomes for interventional studies. We define as clinically relevant cardiovascular outcomes as mortality related to specific cardiovascular events, and/or number of cardiovascular events (including myocardial infarction, stroke). We define relevant surrogate outcomes as blood pressure (mmHg), lipid marker (LDL cholesterol),



or HbA1c. Our rationale for including only these outcomes is that these were used to measure cardiovascular disease risk factors in the development of the Australian Dietary Guidelines We will define favorable results and conclusions as those showing a statistically significant association of wholegrain consumption and decreased cardiovascular disease risk. For each study we will record the stated hypothesis for the study, including the stated outcomes to be measured. If primary outcomes are not stated we will take mortality (related to specific cardiovascular events) as the primary outcome to be measured. In the absence of mortality outcomes, we will take number of cardiovascular events (including non-fatal myocardial infarction and stroke) as the primary outcome. In the absence of these, blood pressure, LDL cholesterol, or HbA1C as risk factors will be used as the primary outcome.

Give information on timing and effect measures, as appropriate.  
variable

## 25 Secondary outcomes

List any additional outcomes that will be addressed. If there are no secondary outcomes enter None.  
Secondary Outcome 1 (Methodological risk of bias) Secondary Outcome 2 (Concordance between results and conclusions) Risk of Bias Assessment We will use the Cochrane Risk of Bias tool for randomised studies to measure the methodological quality of randomized controlled trials. The tool assesses bias across 7 domains and each of these will be reported separately. To measure methodological quality in observational studies we will use the ROBINS-E tool for non-randomized studies (ROBINS-E), which also measures bias across 7 domains. We will classify concordance between study results and conclusions as 'yes' if the authors' conclusions are supported by all outcomes. This will include the reporting of all significant and non-significant results. Otherwise, concordance will be classified as 'no'.

Give information on timing and effect measures, as appropriate.  
variable

26

**Supplementary File 3: List of Excluded Studies**

| Author: Year                             | Title                                                                                                                                                                     | Reason For Exclusion                                                   |
|------------------------------------------|---------------------------------------------------------------------------------------------------------------------------------------------------------------------------|------------------------------------------------------------------------|
| Ahn, Y 2013 <sup>1</sup>                 | Rice-eating pattern and the risk of metabolic syndrome especially waist circumference in Korean Genome and Epidemiology Study (KoGES)                                     | No wholegrain rice group on its own. Only mixed meals                  |
| Alonso, A 2006 <sup>2</sup>              | Vegetable protein and fiber from cereal are inversely associated with the risk of hypertension in a Spanish cohort                                                        | Fiber from cereals was not exclusively from wholegrain products        |
| Altorf-van der Kuil, W 2012 <sup>3</sup> | Sources of dietary protein and risk of hypertension in a general Dutch population                                                                                         | The study does not specify grain source of protein is from wholegrains |
| Appleby, PN 1999 <sup>4</sup>            | The Oxford Vegetarian Study: an overview                                                                                                                                  | No analysis of wholegrains, only dietary fiber                         |
| Assmann, KE 2015 <sup>5</sup>            | A Healthy Dietary Pattern at Midlife, Combined with a Regulated Energy Intake, Is Related to Increased Odds for Healthy Aging                                             | Dietary pattern assessment only. No separate analysis of wholegrains   |
| Bae, JM 2002 <sup>6</sup>                | A nested case-control study on the high-normal blood pressure as a risk factor of hypertension in Korean middle-aged men                                                  | No measurement of wholegrain intake, only total dietary fiber          |
| Bazzano, LA 2003 <sup>7</sup>            | Dietary fiber intake and reduced risk of coronary heart disease in US men and women: the National Health and Nutrition Examination Survey I Epidemiologic Follow-up Study | No separate analysis of dietary fiber from wholegrains                 |
| Bernstein, AM 2011 <sup>8</sup>          | Cereal fiber and coronary heart disease: a comparison of modeling approaches for repeated dietary measurements, intermediate outcomes, and long follow-up                 | No separate analysis of cereal fiber from wholegrains                  |
| Bertoia, ML 2014 <sup>9</sup>            | Mediterranean and Dietary Approaches to Stop Hypertension dietary patterns and risk of sudden cardiac death in postmenopausal women                                       | Dietary pattern assessment only. No separate analysis of wholegrains   |

|                                        |                                                                                                                                                                             |                                                                            |
|----------------------------------------|-----------------------------------------------------------------------------------------------------------------------------------------------------------------------------|----------------------------------------------------------------------------|
|                                        |                                                                                                                                                                             |                                                                            |
| Bingham, CM<br>2012 <sup>10</sup>      | Food choices and health during military service: increases in sugar- and fibre-containing foods and changes in anthropometric and clinical risk factors                     | Cross sectional analysis only of diet. No measurement of whole grain foods |
| Buil-Cosiales, P<br>2014 <sup>11</sup> | Fiber intake and all-cause mortality in the Prevención con Dieta Mediterránea (PREDIMED) study                                                                              | Participants did not meet the inclusion criteria                           |
| Burger, KN<br>2011 <sup>12</sup>       | Dietary glycemic load and glycemic index and risk of coronary heart disease and stroke in Dutch men and women: the EPIC-MORGEN study                                        | No measurement of wholegrain intake                                        |
| Burke, V<br>2005 <sup>13</sup>         | Predictors of body mass index and associations with cardiovascular risk factors in Australian children: a prospective cohort study                                          | No measurement of wholegrain intake                                        |
| Chuang, S-C<br>2012 <sup>14</sup>      | Fiber intake and total and cause-specific mortality in the European Prospective Investigation into Cancer and Nutrition cohort                                              | No separate analysis of cereal fiber from wholegrains                      |
| Crowe, FL<br>2012 <sup>15</sup>        | Dietary fibre intake and ischaemic heart disease mortality: the European Prospective Investigation into Cancer and Nutrition-Heart study                                    | No separate analysis of cereal fiber from wholegrains                      |
| Djoussé, L<br>2009 <sup>16</sup>       | Relation between modifiable lifestyle factors and lifetime risk of heart failure                                                                                            | No separate analysis of cereal from wholegrains                            |
| Eshak, ES<br>2014 <sup>17</sup>        | Rice consumption is not associated with risk of cardiovascular disease morbidity or mortality in Japanese men and women: a large population-based, prospective cohort study | No separate analysis of brown/unrefined rice                               |
| Flint, AJ<br>2009 <sup>18</sup>        | Whole grains and incident hypertension in men                                                                                                                               | No clinical CVD outcome measured                                           |

|                                     |                                                                                                                                                           |                                                                                                                               |
|-------------------------------------|-----------------------------------------------------------------------------------------------------------------------------------------------------------|-------------------------------------------------------------------------------------------------------------------------------|
| Guo, J 2013 <sup>19</sup>           | Influence of dietary patterns on the risk of acute myocardial infarction in China population: the INTERHEART China study                                  | Only 'Grains' measured for association with risk of MI. No separate analysis for wholegrains                                  |
| Hansen-Krone, IJ 2012 <sup>20</sup> | Heart healthy diet and risk of myocardial infarction and venous thromboembolism. The Tromso Study                                                         | Dietary pattern assessment only. No separate analysis of wholegrains                                                          |
| Iso, H 2007 <sup>21</sup>           | Nutrition and disease in the Japan Collaborative Cohort Study for Evaluation of Cancer (JACC)                                                             | No separate analysis of brown/unrefined rice                                                                                  |
| Jacobs, DR Jr 2000 <sup>22</sup>    | Fiber from whole grains, but not refined grains, is inversely associated with all-cause mortality in older women: the Iowa women's health study           | Fiber from cereals was not exclusively from whole grain products for the high wholegrain fiber group (29% from refined grain) |
| Jansen, MC 1999 <sup>23</sup>       | Dietary fiber and plant foods in relation to colorectal cancer mortality: the seven countries study                                                       | No clinical CVD outcome measured                                                                                              |
| Johnsen, NF 2015 <sup>24</sup>      | Whole-grain products and whole-grain types are associated with lower all-cause and cause-specific mortality in the Scandinavian HELGA cohort              | No combined data for men and woman                                                                                            |
| Kanda, A 1999 <sup>25</sup>         | Association of lifestyle parameters with the prevention of hypertension in elderly Japanese men and women: a four-year follow-up of normotensive subjects | No separate analysis of brown/unrefined rice No clinical CVD outcome measured                                                 |
| Kochar, J 2012 <sup>26</sup>        | Breakfast cereals and risk of hypertension in the Physicians' Health Study I                                                                              | No clinical CVD outcome measured                                                                                              |
| Kokubo, Y 2011 <sup>27</sup>        | Dietary fiber intake and risk of cardiovascular disease in the Japanese population: the Japan Public Health Center-based study cohort                     | No separate analysis of fiber from wholegrains                                                                                |
| Larsson, SC 2016 <sup>28</sup>      | Dietary Approaches to Stop Hypertension Diet and Incidence of Stroke: Results From 2 Prospective Cohorts                                                  | Dietary pattern assessment only. No separate analysis of wholegrains                                                          |
| Li, S 2014 <sup>29</sup>            | Dietary fiber intake and mortality among survivors of myocardial infarction: prospective cohort study                                                     | Participants did not meet the inclusion criteria                                                                              |

|                                          |                                                                                                                                                                      |                                                                                           |
|------------------------------------------|----------------------------------------------------------------------------------------------------------------------------------------------------------------------|-------------------------------------------------------------------------------------------|
| Liang, W 2010 <sup>30</sup>              | White rice-based food consumption and ischemic stroke risk: a case-control study in southern china                                                                   | No separate analysis of brown rice/wholegrains                                            |
| Liu, S 2000 <sup>31</sup>                | A prospective study of whole-grain intake and risk of type 2 diabetes mellitus in US women                                                                           | No clinical CVD outcome measured                                                          |
| Mozaffarian, D 2003 <sup>32</sup>        | Cereal, fruit, and vegetable fiber intake and the risk of cardiovascular disease in elderly individuals                                                              | No separate analysis of cereal fiber from wholegrains                                     |
| Negri, E 2003 <sup>33</sup>              | Fiber intake and risk of nonfatal acute myocardial infarction                                                                                                        | No separate analysis of cereal fiber from wholegrains                                     |
| Oh, K 2005 <sup>34</sup>                 | Carbohydrate intake, glycemic index, glycemic load, and dietary fiber in relation to risk of stroke in women                                                         | No separate analysis of cereal fiber from wholegrains                                     |
| Pan, A 2012 <sup>35</sup>                | Red meat consumption and mortality: results from 2 prospective cohort studies                                                                                        | No analysis of whole grain intake and CVD outcomes                                        |
| Park, Y 2011 <sup>36</sup>               | Dietary fiber intake and mortality in the NIH-AARP diet and health study                                                                                             | No separate analysis of cereal fiber from wholegrains. No combined data for men and woman |
| Pierucci, P 2012 <sup>37</sup>           | Diet and myocardial infarction: a nested case-control study in a cohort of elderly subjects in a Mediterranean area of southern Italy                                | No analysis of wholegrains                                                                |
| Rebello, SA 2014 <sup>38</sup>           | Amount, type, and sources of carbohydrates in relation to ischemic heart disease mortality in a Chinese population: a prospective cohort study                       | No combined data for men and woman                                                        |
| Rodriguez-Campello, A 2014 <sup>39</sup> | Dietary habits in patients with ischemic stroke: a case-control study                                                                                                | No separate analysis of breaded foods from wholegrains                                    |
| Shi, Z 2012 <sup>40</sup>                | Rice intake, weight change and risk of the metabolic syndrome development among Chinese adults: the Jiangsu Nutrition Study (JIN)                                    | No analysis of wholegrain intake and CVD outcomes                                         |
| Steffen, LM 2005 <sup>41</sup>           | Associations of plant food, dairy product, and meat intakes with 15-y incidence of elevated blood pressure in young black and white adults: the Coronary Artery Risk | No clinical CVD outcome measured                                                          |

|                                    |                                                                                                                                                        |                                                                           |
|------------------------------------|--------------------------------------------------------------------------------------------------------------------------------------------------------|---------------------------------------------------------------------------|
|                                    | Development in Young Adults (CARDIA) Study                                                                                                             |                                                                           |
| Streppel, MT 2008 <sup>42</sup>    | Dietary fiber intake in relation to coronary heart disease and all-cause mortality over 40 y: the Zutphen Study                                        | No separate analysis of bread and cereal fiber from wholegrains           |
| Threapleton, DE 2013 <sup>43</sup> | Dietary fibre and cardiovascular disease mortality in the UK Women's Cohort Study                                                                      | No separate analysis of total and breakfast cereal fiber from wholegrains |
| Threapleton, DE 2015 <sup>44</sup> | Dietary fibre intake and risk of ischaemic and haemorrhagic stroke in the UK Women's Cohort Study                                                      | No separate analysis of total and breakfast cereal fiber from wholegrains |
| Wang, L 2007 <sup>45</sup>         | Whole- and refined-grain intakes and the risk of hypertension in women                                                                                 | No clinical CVD outcome measured                                          |
| Wolk, A 1999 <sup>46</sup>         | Long-term intake of dietary fiber and decreased risk of coronary heart disease among women                                                             | No separate analysis of fiber from wholegrains                            |
| Yu, D 2014 <sup>47</sup>           | Adherence to dietary guidelines and mortality: a report from prospective cohort studies of 134,000 Chinese adults in urban Shanghai                    | Dietary pattern assessment only. No separate analysis of wholegrains      |
| Yu, D 2016 <sup>48</sup>           | Dietary glycemic index, glycemic load, and refined carbohydrates are associated with risk of stroke: a prospective cohort study in urban Chinese women | No analysis of wholegrains                                                |

1. Ahn Y, Park SJ, Kwack HK, et al. Rice-eating pattern and the risk of metabolic syndrome especially waist circumference in Korean Genome and Epidemiology Study (KoGES). *BMC Public Health* 2013;**13**:61.
2. Alonso A, Beunza JJ, Bes-Rastrollo M, et al. Vegetable protein and fiber from cereal are inversely associated with the risk of hypertension in a Spanish cohort. *Arch Med Res* 2006;**37**(6):778-86.

- 1  
2  
3 3. Altorf-van der Kuil W, Engberink MF, Geleijnse JM, et al. Sources of dietary protein and risk of  
4  
5 hypertension in a general Dutch population. *Br J Nutr* 2012;**108**(10):1897-903.  
6
- 7  
8 4. Appleby PN, Thorogood M, Mann JI, et al. The Oxford Vegetarian Study: an overview. *Am J Clin Nutr*  
9  
10 1999;**70**(3 Suppl):525S-31S.  
11
- 12 5. Assmann KE, Lassale C, Andreeva VA, et al. A Healthy Dietary Pattern at Midlife, Combined with a  
13  
14 Regulated Energy Intake, Is Related to Increased Odds for Healthy Aging. *J Nutr*  
15  
16 2015;**145**(9):2139-45.  
17
- 18 6. Bae JM, Ahn YO. A nested case-control study on the high-normal blood pressure as a risk factor of  
19  
20 hypertension in Korean middle-aged men. *J Korean Med Sci* 2002;**17**(3):328-36.  
21
- 22 7. Bazzano LA, He J, Ogden LG, et al. Dietary fiber intake and reduced risk of coronary heart disease in US  
23  
24 men and women: the National Health and Nutrition Examination Survey I Epidemiologic Follow-  
25  
26 up Study. *Arch Intern Med* 2003;**163**(16):1897-904.  
27
- 28 8. Bernstein AM, Rosner BA, Willett WC. Cereal fiber and coronary heart disease: a comparison of  
29  
30 modeling approaches for repeated dietary measurements, intermediate outcomes, and long  
31  
32 follow-up. *Eur J Epidemiol* 2011;**26**(11):877-86.  
33
- 34 9. Bertoia ML, Triche EW, Michaud DS, et al. Mediterranean and Dietary Approaches to Stop  
35  
36 Hypertension dietary patterns and risk of sudden cardiac death in postmenopausal women. *Am*  
37  
38 *J Clin Nutr* 2014;**99**(2):344-51.  
39
- 40 10. Bingham CM, Lahti-Koski M, Absetz P, et al. Food choices and health during military service:  
41  
42 increases in sugar- and fibre-containing foods and changes in anthropometric and clinical risk  
43  
44 factors. *Public Health Nutr* 2012;**15**(7):1248-55.  
45  
46  
47  
48  
49
- 50 11. Buil-Cosiales P, Zazpe I, Toledo E, et al. Fiber intake and all-cause mortality in the Prevención con  
51  
52 Dieta Mediterránea (PREDIMED) study. *Am J Clin Nutr* 2014;**100**(6):1498-507.  
53  
54  
55  
56  
57  
58  
59

- 1  
2  
3 12. Burger KN, Beulens JW, Boer JM, et al. Dietary glycaemic load and glycaemic index and risk of coronary  
4 heart disease and stroke in Dutch men and women: the EPIC-MORGEN study. *PLoS One*  
5  
6 2011;**6**(10):e25955.  
7  
8
- 9  
10 13. Burke V, Beilin LJ, Simmer K, et al. Predictors of body mass index and associations with  
11 cardiovascular risk factors in Australian children: a prospective cohort study. *Int J Obes*  
12  
13 2005;**29**(1):15-23.  
14  
15
- 16 14. Chuang S-C, Norat T, Murphy N, et al. Fiber intake and total and cause-specific mortality in the  
17 European Prospective Investigation into Cancer and Nutrition cohort. *Am J Clin Nutr*  
18  
19 2012;**96**(1):164-74.  
20  
21
- 22 15. Crowe FL, Key TJ, Appleby PN, et al. Dietary fibre intake and ischaemic heart disease mortality: the  
23 European Prospective Investigation into Cancer and Nutrition-Heart study. *Eur J Clin Nutr*  
24  
25 2012;**66**(8):950-6.  
26  
27
- 28 16. Djoussé L, Driver JA, Gaziano JM, et al. Relation between modifiable lifestyle factors and lifetime risk  
29 of heart failure. *JAMA* 2009;**302**(4):394-400.  
30  
31
- 32 17. Eshak ES, Hiroyasu I, Kazumasa Y, et al. Rice consumption is not associated with risk of  
33 cardiovascular disease morbidity or mortality in Japanese men and women: a large population-  
34 based, prospective cohort study. *Am J Clin Nutr* 2014;**100**(1):199-207.  
35  
36  
37  
38
- 39 18. Flint AJ, Hu FB, Glynn RJ, et al. Whole grains and incident hypertension in men. *Am J Clin Nutr*  
40  
41 2009;**90**(3):493-98.  
42  
43  
44
- 45 19. Guo J, Li W, Wang Y, et al. Influence of dietary patterns on the risk of acute myocardial infarction in  
46 China population: the INTERHEART China study. *Chin Med J* 2013;**126**(3):464-70.  
47  
48  
49
- 50 20. Hansen-Krone IJ, Enga KF, Njolstad I, et al. Heart healthy diet and risk of myocardial infarction and  
51 venous thromboembolism. The Tromso Study. *Thromb Haemost* 2012;**108**(3):554-60.  
52  
53  
54  
55  
56  
57  
58  
59



- 1  
2  
3 21. Iso H, Kubota Y. Nutrition and disease in the Japan Collaborative Cohort Study for Evaluation of  
4 Cancer (JACC). *Asian Pacific journal of cancer prevention: APJCP* 2007;**8** Suppl:35-80.  
5  
6  
7 22. Jacobs DR, Pereira MA, Meyer KA, et al. Fiber from whole grains, but not refined grains, is inversely  
8 associated with all-cause mortality in older women: the Iowa women's health study.  
9  
10  
11  
12 *J Am Coll Nutr* 2000;**19**(3 Suppl):326S-30S.  
13  
14 23. Jansen MC, Bueno-de-Mesquita HB, Buzina R, et al. Dietary fiber and plant foods in relation to  
15 colorectal cancer mortality: the Seven Countries Study. *Int J Cancer* 1999;**81**(2):174-9.  
16  
17  
18 24. Johnsen NF, Frederiksen K, Christensen J, et al. Whole-grain products and whole-grain types are  
19 associated with lower all-cause and cause-specific mortality in the Scandinavian HELGA cohort.  
20  
21  
22 *Br J Nutr* 2015;**114**(4):608-23.  
23  
24  
25 25. Kanda A, Hoshiyama Y, Kawaguchi T. Association of lifestyle parameters with the prevention of  
26 hypertension in elderly Japanese men and women: a four-year follow-up of normotensive  
27 subjects. *Asia Pac J Public Health* 1999;**11**(2):77-81.  
28  
29  
30  
31 26. Kochar J, Gaziano JM, Djousse L. Breakfast cereals and risk of hypertension in the Physicians' Health  
32 Study I. *Clin Nutr* 2012;**31**(1):89-92.  
33  
34  
35  
36 27. Kokubo Y, Iso H, Saito I, et al. Dietary fiber intake and risk of cardiovascular disease in the Japanese  
37 population: the Japan Public Health Center-based study cohort. *Eur J Clin Nutr*  
38  
39  
40  
41  
42 2011;**65**(11):1233-41.  
43  
44 28. Larsson SC, Wallin A, Wolk A. Dietary Approaches to Stop Hypertension Diet and Incidence of Stroke:  
45 Results From 2 Prospective Cohorts. *Stroke* 2016;**47**(4):986-90.  
46  
47  
48 29. Li S, Flint A, Pai JK, et al. Dietary fiber intake and mortality among survivors of myocardial infarction:  
49 prospective cohort study. *BMJ* 2014;**348**:g2659.  
50  
51  
52 30. Liang W, Lee AH, Binns CW. White rice-based food consumption and ischemic stroke risk: a case-  
53 control study in southern china. *J Stroke Cerebrovasc Dis* 2010;**19**(6):480-84.  
54  
55  
56  
57  
58  
59  
60

- 1  
2  
3 31. Liu S, Manson JE, Stampfer MJ, et al. A prospective study of whole-grain intake and risk of type 2  
4 diabetes mellitus in US women. *Am J Public Health* 2000;**90**(9):1409-15.  
5  
6  
7 32. Mozaffarian D, Kumanyika SK, Lemaitre RN, et al. Cereal, fruit, and vegetable fiber intake and the risk  
8 of cardiovascular disease in elderly individuals. *JAMA* 2003;**289**(13):1659-66.  
9  
10  
11 33. Negri E, La Vecchia C, Pelucchi C, et al. Fiber intake and risk of nonfatal acute myocardial infarction.  
12  
13 *Eur J Clin Nutr* 2003;**57**(3):464-70.  
14  
15 34. Oh K, Hu FB, Cho E, et al. Carbohydrate intake, glycemic index, glycemic load, and dietary fiber in  
16 relation to risk of stroke in women. *Am J Epidemiol* 2005;**161**(2):161-9.  
17  
18  
19 35. Pan A, Sun Q, Bernstein AM, et al. Red meat consumption and mortality: results from 2 prospective  
20 cohort studies. *Arch Intern Med* 2012;**172**(7):555-63.  
21  
22  
23 36. Park Y, Subar AF, Hollenbeck A, et al. Dietary fiber intake and mortality in the NIH-AARP diet and  
24 health study. *Arch Intern Med* 2011;**171**(12):1061-8.  
25  
26  
27 37. Pierucci P, Misciagna G, Ventura MT, et al. Diet and myocardial infarction: a nested case-control  
28 study in a cohort of elderly subjects in a Mediterranean area of southern Italy. *Nutr Metab*  
29 *Cardiovasc Dis* 2012;**22**(9):727-33.  
30  
31  
32 38. Rebello SA, Hiromi K, Chen C, et al. Amount, type, and sources of carbohydrates in relation to  
33 ischemic heart disease mortality in a Chinese population: a prospective cohort study. *Am J Clin*  
34 *Nutr* 2014;**100**(1):53-64.  
35  
36  
37 39. Rodriguez-Campello A, Jimenez-Conde J, Ois A, et al. Dietary habits in patients with ischemic stroke:  
38 a case-control study. *PLoS One* 2014;**9**(12):e114716.  
39  
40  
41 40. Shi Z, Taylor AW, Hu G, et al. Rice intake, weight change and risk of the metabolic syndrome  
42 development among Chinese adults: the Jiangsu Nutrition Study (JIN). *Asia Pac J Clin Nutr*  
43  
44  
45  
46  
47  
48  
49  
50  
51  
52  
53  
54  
55  
56  
57  
58  
59  
60

- 1  
2  
3 41. Steffen LM, Kroenke CH, Yu X, et al. Associations of plant food, dairy product, and meat intakes with  
4  
5 15-y incidence of elevated blood pressure in young black and white adults: the Coronary Artery  
6  
7 Risk Development in Young Adults (CARDIA) Study. *Am J Clin Nutr* 2005;**82**(6):1169-77; quiz 363-  
8  
9 4.  
10  
11  
12 42. Streppel MT, Ocké MC, Boshuizen HC, et al. Dietary fiber intake in relation to coronary heart disease  
13  
14 and all-cause mortality over 40 y: the Zutphen Study. *Am J Clin Nutr* 2008;**88**(4):1119-25.  
15  
16  
17 43. Threapleton DE, Greenwood DC, Burley VJ, et al. Dietary fibre and cardiovascular disease mortality in  
18  
19 the UK Women's Cohort Study. *Eur J Epidemiol* 2013;**28**(4):335-46.  
20  
21  
22 44. Threapleton DE, Burley VJ, Greenwood DC, et al. Dietary fibre intake and risk of ischaemic and  
23  
24 haemorrhagic stroke in the UK Women's Cohort Study. *Eur J Clin Nutr* 2015;**69**(4):467-74.  
25  
26  
27 45. Wang L, Gaziano JM, Liu S, et al. Whole- and refined-grain intakes and the risk of hypertension in  
28  
29 women. *Am J Clin Nutr* 2007;**86**(2):472-79.  
30  
31  
32 46. Wolk A, Manson KE, Stampfer MJ, et al. Long-term intake of dietary fiber and decreased risk of  
33  
34 coronary heart disease among women. *JAMA* 1999;**281**(21):1998-2004.  
35  
36  
37 47. Yu D, Zhang X, Xiang Y-B, et al. Adherence to dietary guidelines and mortality: a report from  
38  
39 prospective cohort studies of 134,000 Chinese adults in urban Shanghai. *Am J Clin Nutr* 2014.  
40  
41  
42 48. Yu D, Zhang X, Shu XO, et al. Dietary glycemic index, glycemic load, and refined carbohydrates are  
43  
44 associated with risk of stroke: a prospective cohort study in urban Chinese women. *Am J Clin*  
45  
46  
47  
48  
49  
50  
51  
52  
53  
54  
55  
56  
57  
58  
59  
60

## Supplementary File 4: Characteristics of Included Studies

| Study ID          | Study Design | Length of Intervention /Follow up          | Number of Participants | Age (mean years) | Exposure (highest tertile/quartile/quintile or 'yes' to wholegrain foods) | Comparison (lowest tertile/quartile/quintile or 'no' to wholegrain foods) | Outcomes Measured                                                           | Funding Source            | Disclosed author conflicts of interest |
|-------------------|--------------|--------------------------------------------|------------------------|------------------|---------------------------------------------------------------------------|---------------------------------------------------------------------------|-----------------------------------------------------------------------------|---------------------------|----------------------------------------|
| Djousse, L 2007   | Cohort       | 19.6 years (average)                       | 21,376                 | 53.7 ±9.5 years  | Wholegrain Breakfast Cereal ≥ 7 (1 serving=1 cup [250 mL]) servings/week  | Wholegrain Breakfast Cereal 0 servings/week                               | Heart Failure                                                               | Non-Industry <sup>1</sup> | Yes <sup>a</sup>                       |
| Holmberg, S 2009  | Cohort       | 12 years                                   | 1,752                  | 50.2 years       | Whole meal bread (wholegrain rye bread and crisp/hard bread)              | White or Rye bread                                                        | Coronary Heart Disease Death or Event (death or hospitalization)            | Industry <sup>2</sup>     | No disclosure                          |
| Huang, T 2015     | Cohort       | 14 years (average)                         | 367,442                | 61.7 years       | Wholegrain 1.20 oz eq/day                                                 | Wholegrain 0.13 oz eq/day                                                 | Cardiovascular Disease Death                                                | Industry <sup>3</sup>     | Yes <sup>b</sup>                       |
| Jacobs, DRJr 1998 | Cohort       | 10 years                                   | 34,492                 | 55–69 years      | Wholegrain 22.5 servings/week (median)                                    | Wholegrain 1.5 servings/week (median)                                     | Ischemic Heart Disease Death                                                | Non-Industry <sup>4</sup> | No disclosure                          |
| Jacobs, DRJr 1999 | Cohort       | 10 years                                   | 38,740                 | 61.5 years       | Wholegrain 22.5 servings/week (median)                                    | Wholegrain 1.5 servings/week (median)                                     | Cardiovascular Disease Death (all cardiovascular disease)                   | Non-Industry <sup>5</sup> | No disclosure                          |
| Jacobs, DRJr 2001 | Cohort       | Baseline 1977-83, followed through to 1994 | 33,848                 | 35-56 years      | Wholegrain Bread Score (2.25-5.40) *                                      | Wholegrain Bread Score (0.05-0.60) *                                      | Cardiovascular Disease Death (total cardiovascular disease)                 | Non-Industry <sup>6</sup> | No disclosure                          |
| Jacobs, DRJr 2007 | Cohort       | 17 years                                   | 27,312                 | 55–69 years      | Wholegrain ≥ 19 servings/week                                             | Wholegrain 0–3.5 servings/week                                            | Cardiovascular Disease Death                                                | Industry <sup>7</sup>     | No <sup>c</sup>                        |
| Jensen, MK 2004   | Cohort       | 14 years                                   | 42,850                 | 40-75 years      | Wholegrain 42.4 g/day (median)                                            | Wholegrain 3.5 g/day (median)                                             | Coronary Heart Disease Death or Event (non-fatal MI infarction & fatal CHD) | Industry <sup>8</sup>     | No <sup>d</sup>                        |
| Li, Y 2015        | 2 Cohorts    | 30 years & 24 years                        | 127,536                | NHS 30-55 years  | Wholegrain 4.6 % of total Energy Intake                                   | Wholegrain 0.4 % of total Energy Intake                                   | Coronary Heart Disease Death or                                             | Non-Industry <sup>9</sup> | Yes <sup>e</sup>                       |

|                     |              |                               |         |                                        |                                                                                      |                                                                    |                                                                                                                                                                                               |                            |                  |
|---------------------|--------------|-------------------------------|---------|----------------------------------------|--------------------------------------------------------------------------------------|--------------------------------------------------------------------|-----------------------------------------------------------------------------------------------------------------------------------------------------------------------------------------------|----------------------------|------------------|
|                     |              |                               |         | HPFS 40-75 years                       |                                                                                      |                                                                    | Event (non-fatal MI & CHD deaths)                                                                                                                                                             |                            |                  |
| Liu, S 1999         | Cohort       | 10 years                      | 75,521  | 38-63 years                            | Wholegrain 2.70 servings/day (median)                                                | Wholegrain 0.13 servings/day (median)                              | Coronary Heart Disease Death or Event (non-fatal MI & fatal CHD)                                                                                                                              | Non-Industry <sup>10</sup> | No disclosure    |
| Liu, S 2000         | Cohort       | 12 years                      | 75,521  | 38-63 years                            | Wholegrain 2.70 servings/day (median)                                                | Wholegrain 0.13 servings/day (median)                              | Ischemic Stroke Death or Event                                                                                                                                                                | Non-Industry <sup>11</sup> | No disclosure    |
| Liu, S 2003         | Cohort       | 5.5 years (average)           | 86,190  | 40-84 years                            | Wholegrain Breakfast Cereal 1 servings/day                                           | Rarely                                                             | Cardiovascular Disease Deaths                                                                                                                                                                 | Non-Industry <sup>12</sup> | Yes <sup>f</sup> |
| Lockheart, MSK 2007 | Case Control |                               | 211     | Case 62.5 ± 7.7<br>Control 62.25 ± 7.7 | Wholegrain Breakfast Cereal 36 g/day (median) & Wholegrain breads 240 g/day (median) | 0<br><br>94 g/day                                                  | Myocardial Infarction (first MI)                                                                                                                                                              | Industry <sup>13</sup>     | No Disclosure    |
| Mizrahi, A 2009     | Cohort       | 24 years                      | 3,932   | 40-74 years                            | Wholegrain Men 280-1321 g/day (range)<br><br>Women 195-963 g/day (range)             | Wholegrain Men 0-139 g/day (range)<br><br>Women 0-89 g/day (range) | Cerebrovascular Disease Death or Event (total strokes, including all acute strokes, subarachnoidal haemorrhages and other, undefined strokes; ischaemic stroke and intracerebral haemorrhage) | Non-Industry <sup>14</sup> | No <sup>g</sup>  |
| Muraki I, 2015      | 3 Cohorts    | 26 years, 20 years & 24 years | 207,556 | Not available                          | Brown Rice ≥ 5 servings/week                                                         | Brown Rice < 1 servings/week                                       | Cardiovascular Disease Death or Event (nonfatal MI, fatal CAD, and stroke (nonfatal or fatal))                                                                                                | Non-Industry <sup>15</sup> | No <sup>h</sup>  |

1  
2  
3  
4  
5  
6  
7  
8  
9  
10  
11  
12  
13  
14  
15  
16  
17  
18  
19  
20  
21  
22  
23  
24  
25  
26  
27  
28  
29  
30  
31  
32  
33  
34  
35  
36  
37  
38  
39  
40  
41  
42  
43  
44  
45  
46  
47

|                    |              |                                            |        |             |                                    |                                    |                                                                                                                                                                                                                                                                            |                            |                  |
|--------------------|--------------|--------------------------------------------|--------|-------------|------------------------------------|------------------------------------|----------------------------------------------------------------------------------------------------------------------------------------------------------------------------------------------------------------------------------------------------------------------------|----------------------------|------------------|
| Nettleton, JA 2008 | Cohort       | 13.3 years (average)                       | 14,153 | 45-64 years | Wholegrain 1.3 ± 0.01 servings/day | Wholegrain 1.1 ± 0.04 servings/day | Heart Failure Death or Event                                                                                                                                                                                                                                               | Non-Industry <sup>16</sup> | No <sup>i</sup>  |
| Sahyoun, NR 2006   | Cohort       | Baseline 1981-84, followed through to 1995 | 535    | 60-98 years | Wholegrain >1.94 servings/day      | Wholegrain ≤0.56 servings/day      | Cardiovascular Disease Death                                                                                                                                                                                                                                               | Non-Industry <sup>17</sup> | No <sup>i</sup>  |
| Sonestedt, E 2015  | Cohort       | 14 year (average)                          | 26,445 | 44-74 years | Wholegrain 2.5 portions/day        | Wholegrain 0 portions/day          | Cardiovascular Disease Death or Event (Incident CVD events, Stroke events, CHD (fatal or non-fatal myocardial infarction or death due to ischemic heart disease), Ischemic stroke).                                                                                        | Non-Industry <sup>18</sup> | No Disclosure    |
| Steffen, L M 2003  | Cohort       | 11 years                                   | 11,940 | 45-64 years | Wholegrain 3.0 servings/day        | Wholegrain 0.1 servings/day        | Coronary Artery Disease Death or Event (the first definite or probable MI, silent MI by electrocardiography, definite CAD death, or coronary revascularization) & Ischemic Stroke Death or Event (first definite or probable cardioembolic or thrombotic brain infarction) | Non-Industry <sup>19</sup> | Yes <sup>k</sup> |
| Tavani, A 2003     | Case Control |                                            | 881    | 25-79 years | Wholegrain Bread Consumers         | Wholegrain Bread Non-Consumers     | Myocardial Infarction (first acute)                                                                                                                                                                                                                                        | Non-Industry <sup>20</sup> | No Disclosure    |

|                   |                    |                        |         |                                                 |                                                                            |                                                                               |                                           |                                |                  |
|-------------------|--------------------|------------------------|---------|-------------------------------------------------|----------------------------------------------------------------------------|-------------------------------------------------------------------------------|-------------------------------------------|--------------------------------|------------------|
| Tavani, A<br>2004 | 3 Case<br>Controls |                        | 1,602   | 17-79<br>years                                  | Wholegrain >2<br>portions/per week                                         | Wholegrain <2<br>portions/per week                                            | Myocardial<br>Infarction (first<br>acute) | Non-<br>Industry <sup>21</sup> | No<br>Disclosure |
| Wu, H<br>2015     | 2<br>Cohort        | 26 years &<br>24 years | 118,085 | NHS 30-<br>55 years<br><br>HPFS 32-<br>87 years | Wholegrain<br><br>NHS 33 g/day (median)<br><br>HPFS 47.8 g/day<br>(median) | Wholegrain<br><br>NHS 4.2 g/day<br>(median)<br><br>HPFS 5.9 g/day<br>(median) | Cardiovascular<br>Disease Death           | Non-<br>Industry <sup>22</sup> | No <sup>1</sup>  |

\*Wholegrain bread score: slices eaten per day (question 1) times the percentage wholegrain flour used in bread. Q5 = 9 slices of bread usually eaten per day x

60% wholegrain flour. Q1 = 1 slice of bread per day x 5% wholegrain flour

**Description of Funding Source (Verbatim)**

1. The PHS is supported by grants CA-34944 and CA-40360 from the National Cancer Institute and grants HL-26490 and HL-34595 from the National Heart Lung and Blood Institute (NHLBI), Bethesda, Maryland. Dr Djousse´ is supported by grant K01 HL70444 from the NHLBI
2. This study was supported by grants from AFA Insurance, LRF Research Foundation, The Swedish Council for Working Life and Social Research and Kronoberg County Council
3. This study is funded by an unrestricted research fund from NutraSource. Dr. Qi was supported by grants from the National Heart, Lung, and Blood Institute (HL071981), the National Institute of Diabetes and Digestive and Kidney Diseases (DK091718), the Boston Obesity Nutrition Research Center (DK46200), and United States–Israel Binational Science Foundation Grant 2011036. Dr. Qi was a recipient of the American Heart Association Scientist Development Award (0730094 N). Funding from NutraSource. There were no other relationships or activities that could appear to have influenced the submitted work
4. Supported by the National Institutes of Health (research grant CA-39742)
5. This research was supported by grant CA-39742 from the National Institutes of Health
6. Institute for Nutrition Research, University of Oslo and National Health Screening Service, Oslo, Norway



- 1  
2  
3 7. RB was supported by grants from the Norwegian Research Council, The Johan Throne Holst Nutrition Research Foundation,  
4  
5 and The Norwegian Cancer Society. DRJ was supported by the Norwegian Research Council and by a grant (RO1 CA39742)  
6  
7 from the National Cancer Institute.  
8  
9
- 10 8. Supported by research grants HL35464 and CA55075 from the National Institutes of Health and a scholarship from the Danish  
11  
12 Research Foundation (to MKJ). The Kellogg Company provided unrestricted funding of the development of the whole-grain  
13  
14 database  
15  
16
- 17 9. The cohorts were supported by grants UM1 CA186107, R01 HL034594, R01 HL35464, R01 HL60712, and UM1 CA167552 from  
18  
19 the National Institutes of Health.  
20  
21
- 22 10. Supported by research grants HL24074, HL34594, and CA40356 and by nutrition training grant T32DK07703 from the  
23  
24 National Institutes of Health  
25  
26
- 27 11. The work reported in this article was supported by grants CA40356, HL24074, HL34594, and DK02767 from the National  
28  
29 Institutes of Health  
30  
31
- 32 12. Supported by grants HL-42441 and DK02767 from the National Institutes of Health  
33  
34
- 35 13. The present study was supported by NIH NRSA T32HL007779. CVD Epidemiology and Prevention, American Heart  
36  
37 Association, Greater Midwest Affiliate. Throne Holst's Foundation for Nutrition Research. The Norwegian Association of  
38  
39 Margarine Producers. DeNoFa Fabriker A/S and Tine Norwegian Dairies  
40  
41  
42  
43  
44

1  
2  
3 14. The present study received funds from the Social Insurance Institution, Finland.  
4

5  
6 15. Supported by NIH grants CA50385, CA87969, CA176726, CA167552, HL60712, HL034594, HL088521, and HL35464. QS was  
7  
8 supported by a career development grant R00HL098459 sponsored by the National Heart, Lung, and Blood Institute. FI was  
9  
10 supported by Medical Research Council Epidemiology Unit Core Support (MC\_UU\_12015/5)  
11  
12

13 16. This research was supported by the National Institutes of Health grant HL73366, training grant T32 HL07779, and contracts  
14  
15 N01-HC-55015, N01-HC-55016, N01-HC-55018, N01-HC-55019, N01-HC-55020, N01-HC-55021, and N01- HC-55022 from the  
16  
17 National Heart, Lung, and Blood Institute.  
18  
19

20 17. Supported by the US Department of Agriculture, under agreement no. 58-1950-4-401  
21  
22

23 18. This study was supported by the Swedish Medical Research Council, the Swedish Heart and Lung Foundation, the Skåne  
24  
25 University Hospital, the Albert Pålsson Research Foundation, and the Crafoord Foundation  
26  
27

28 19. Supported by the National Heart, Lung, and Blood Institute (contract nos. N01-HC-55015, N01-HC-55016, HC-55018, N01-HC-  
29  
30 55019, HC-55020, N01-HC-55021, and N01-HC-55022)  
31  
32

33 20. This study was partly supported by "Ministero della Salute" (contract No 177, RF 2001).  
34

35 21. Partly supported by "Ministero della Salute" (Contract n.177, RF 2001) and by the Commission of the European Communities  
36  
37 (Contract No. QLK1-CT-2000-00069)  
38  
39  
40  
41  
42  
43  
44

1  
2  
3 22. This work was supported by research grants R01 DK58845 (Dr Hu), P01 CA87969, R01 HL034594, UM1 CA167552 (DrWillett),  
4  
5 R01 HL35464 (Dr Rimm), HL60712 (DrHu), U54CA155626 (Dr Hu), and CA055075 from the National Institutes of Health and  
6  
7 Career Development Award R00HL098459 from the National Heart, Lung, and Blood Institute (Dr Sun)  
8  
9  
10  
11  
12  
13  
14  
15  
16  
17  
18  
19  
20  
21  
22  
23  
24  
25  
26  
27  
28  
29  
30  
31  
32  
33  
34  
35  
36  
37  
38  
39  
40  
41  
42  
43  
44  
45  
46  
47

For peer review only

**Description of Author Disclosure Statement (Verbatim)**

- a) Dr Gaziano has received investigator-initiated research grants from BASF, DSM Pharmaceuticals, Wyeth Pharmaceuticals, McNeil Consumer Products, and Pliva as well as honoraria from Bayer and Pfizer for speaking engagements. He is a consultant for Bayer, McNeil Consumer Products, Wyeth Pharmaceuticals, Merck, Nutraquest, and GlaxoSmithKline
- b) A Lee NutraSource (AWL), Royal Oak, MI 48073, USA. S Cho NutraSource (SSC), Clarksville, MD 21029, USA
- c) None of the authors had a conflict of interest
- d) None of the authors had any conflicts of interest
- e) Dr. Hu has received honoraria from the Hass Avocado Board for participating in an academic symposium; and grant support from Metagenics and the California Walnut Commission
- f) In 2001 SL received honoraria from General Mills Co for a presentation unrelated to this article
- g) None of the authors had any personal or financial conflict of interest.
- h) All authors reported no conflicts of interest related to the study.
- i) The authors have no conflicts of interest to report
- j) None of the authors had a conflict of interest
- k) None of the authors had any conflicts of interest except for DRJ, who holds a research award from General Mills, Inc, Minneapolis

1  
2  
3 l) None reported  
4  
5  
6  
7  
8  
9  
10  
11  
12  
13  
14  
15  
16  
17  
18  
19  
20  
21  
22  
23  
24  
25  
26  
27  
28  
29  
30  
31  
32  
33  
34  
35  
36  
37  
38  
39  
40  
41  
42  
43  
44  
45  
46  
47

For peer review only

## MOOSE Checklist for Meta-analyses of Observational Studies

| Item No                                     | Recommendation                                                                                                                                                                                                                                                               | Reported on Page No                             |
|---------------------------------------------|------------------------------------------------------------------------------------------------------------------------------------------------------------------------------------------------------------------------------------------------------------------------------|-------------------------------------------------|
| Reporting of background should include      |                                                                                                                                                                                                                                                                              |                                                 |
| 1                                           | Problem definition                                                                                                                                                                                                                                                           | 7                                               |
| 2                                           | Hypothesis statement                                                                                                                                                                                                                                                         | 10                                              |
| 3                                           | Description of study outcome(s)                                                                                                                                                                                                                                              | 10-11                                           |
| 4                                           | Type of exposure or intervention used                                                                                                                                                                                                                                        | 9-10                                            |
| 5                                           | Type of study designs used                                                                                                                                                                                                                                                   | 9                                               |
| 6                                           | Study population                                                                                                                                                                                                                                                             | 9                                               |
| Reporting of search strategy should include |                                                                                                                                                                                                                                                                              |                                                 |
| 7                                           | Qualifications of searchers (eg, librarians and investigators)                                                                                                                                                                                                               | 8                                               |
| 8                                           | Search strategy, including time period included in the synthesis and key words                                                                                                                                                                                               | & Supp File 1                                   |
| 9                                           | Effort to include all available studies, including contact with authors                                                                                                                                                                                                      | 8                                               |
| 10                                          | Databases and registries searched                                                                                                                                                                                                                                            | 8                                               |
| 11                                          | Search software used, name and version, including special features used (eg, explosion)                                                                                                                                                                                      | 8                                               |
| 12                                          | Use of hand searching (eg, reference lists of obtained articles)                                                                                                                                                                                                             | 8                                               |
| 13                                          | List of citations located and those excluded, including justification                                                                                                                                                                                                        | 16 & Supplementary File 3                       |
| 14                                          | Method of addressing articles published in languages other than English                                                                                                                                                                                                      | 10                                              |
| 15                                          | Method of handling abstracts and unpublished studies                                                                                                                                                                                                                         | 10                                              |
| 16                                          | Description of any contact with authors                                                                                                                                                                                                                                      | 14                                              |
| Reporting of methods should include         |                                                                                                                                                                                                                                                                              |                                                 |
| 17                                          | Description of relevance or appropriateness of studies assembled for assessing the hypothesis to be tested                                                                                                                                                                   | 9-10                                            |
| 18                                          | Rationale for the selection and coding of data (eg, sound clinical principles or convenience)                                                                                                                                                                                | 7 (according to published protocol Supp File 2) |
| 19                                          | Documentation of how data were classified and coded (eg, multiple raters, blinding and interrater reliability)                                                                                                                                                               | 13-14                                           |
| 20                                          | Assessment of confounding (eg, comparability of cases and controls in studies where appropriate)                                                                                                                                                                             | 14, (included in RoB assessment)                |
| 21                                          | Assessment of study quality, including blinding of quality assessors, stratification or regression on possible predictors of study results                                                                                                                                   | 14 & 19                                         |
| 22                                          | Assessment of heterogeneity                                                                                                                                                                                                                                                  | 15-16                                           |
| 23                                          | Description of statistical methods (eg, complete description of fixed or random effects models, justification of whether the chosen models account for predictors of study results, dose-response models, or cumulative meta-analysis) in sufficient detail to be replicated | 15-16                                           |
| 24                                          | Provision of appropriate tables and graphics                                                                                                                                                                                                                                 | 17-18                                           |
| Reporting of results should include         |                                                                                                                                                                                                                                                                              |                                                 |
| 25                                          | Graphic summarizing individual study estimates and overall estimate                                                                                                                                                                                                          | 21                                              |
| 26                                          | Table giving descriptive information for each study included                                                                                                                                                                                                                 | 17 & Supplementary                              |

|    |                                                        |        |
|----|--------------------------------------------------------|--------|
|    |                                                        | File 4 |
| 27 | Results of sensitivity testing (eg, subgroup analysis) | N/A    |
| 28 | Indication of statistical uncertainty of findings      | 19-21  |

| Item No                                 | Recommendation                                                                                                            | Reported on Page No |
|-----------------------------------------|---------------------------------------------------------------------------------------------------------------------------|---------------------|
| Reporting of discussion should include  |                                                                                                                           |                     |
| 29                                      | Quantitative assessment of bias (eg, publication bias)                                                                    | 21                  |
| 30                                      | Justification for exclusion (eg, exclusion of non-English language citations)                                             | N/A                 |
| 31                                      | Assessment of quality of included studies                                                                                 | 21-23               |
| Reporting of conclusions should include |                                                                                                                           |                     |
| 32                                      | Consideration of alternative explanations for observed results                                                            | 21-22               |
| 33                                      | Generalization of the conclusions (ie, appropriate for the data presented and within the domain of the literature review) | 21-22               |
| 34                                      | Guidelines for future research                                                                                            | 24-25               |
| 35                                      | Disclosure of funding source                                                                                              | 33                  |

review only
