# Supplementary material for: Association of industry ties with outcomes of studies examining the effect of wholegrain foods on cardiovascular disease and mortality: systematic review and meta-analysis
Source: PubMed Central journal article supplement — BMJ Open. 2019 May 19;9(5):e022912. doi: 10.1136/bmjopen-2018-022912 (PMC6530454; doi:10.1136/bmjopen-2018-022912), 2019-05-19
Supplement: bmjopen-2018-022912supp003.pdf [file bmjopen-2018-022912supp003.pdf]

**Supplementary File 3: List of Excluded Studies**

| Author: Year                             | Title                                                                                                                                                                     | Reason For Exclusion                                                   |
|------------------------------------------|---------------------------------------------------------------------------------------------------------------------------------------------------------------------------|------------------------------------------------------------------------|
| Ahn, Y 2013 <sup>1</sup>                 | Rice-eating pattern and the risk of metabolic syndrome especially waist circumference in Korean Genome and Epidemiology Study (KoGES)                                     | No wholegrain rice group on its own. Only mixed meals                  |
| Alonso, A 2006 <sup>2</sup>              | Vegetable protein and fiber from cereal are inversely associated with the risk of hypertension in a Spanish cohort                                                        | Fiber from cereals was not exclusively from wholegrain products        |
| Altorf-van der Kuil, W 2012 <sup>3</sup> | Sources of dietary protein and risk of hypertension in a general Dutch population                                                                                         | The study does not specify grain source of protein is from wholegrains |
| Appleby, PN 1999 <sup>4</sup>            | The Oxford Vegetarian Study: an overview                                                                                                                                  | No analysis of wholegrains, only dietary fiber                         |
| Assmann, KE 2015 <sup>5</sup>            | A Healthy Dietary Pattern at Midlife, Combined with a Regulated Energy Intake, Is Related to Increased Odds for Healthy Aging                                             | Dietary pattern assessment only. No separate analysis of wholegrains   |
| Bae, JM 2002 <sup>6</sup>                | A nested case-control study on the high-normal blood pressure as a risk factor of hypertension in Korean middle-aged men                                                  | No measurement of wholegrain intake, only total dietary fiber          |
| Bazzano, LA 2003 <sup>7</sup>            | Dietary fiber intake and reduced risk of coronary heart disease in US men and women: the National Health and Nutrition Examination Survey I Epidemiologic Follow-up Study | No separate analysis of dietary fiber from wholegrains                 |
| Bernstein, AM 2011 <sup>8</sup>          | Cereal fiber and coronary heart disease: a comparison of modeling approaches for repeated dietary measurements, intermediate outcomes, and long follow-up                 | No separate analysis of cereal fiber from wholegrains                  |
| Bertoia, ML 2014 <sup>9</sup>            | Mediterranean and Dietary Approaches to Stop Hypertension dietary patterns and risk of sudden cardiac death in postmenopausal women                                       | Dietary pattern assessment only. No separate analysis of wholegrains   |

|                                        |                                                                                                                                                                             |                                                                            |
|----------------------------------------|-----------------------------------------------------------------------------------------------------------------------------------------------------------------------------|----------------------------------------------------------------------------|
|                                        |                                                                                                                                                                             |                                                                            |
| Bingham, CM<br>2012 <sup>10</sup>      | Food choices and health during military service: increases in sugar- and fibre-containing foods and changes in anthropometric and clinical risk factors                     | Cross sectional analysis only of diet. No measurement of whole grain foods |
| Buil-Cosiales, P<br>2014 <sup>11</sup> | Fiber intake and all-cause mortality in the Prevención con Dieta Mediterránea (PREDIMED) study                                                                              | Participants did not meet the inclusion criteria                           |
| Burger, KN<br>2011 <sup>12</sup>       | Dietary glycemic load and glycemic index and risk of coronary heart disease and stroke in Dutch men and women: the EPIC-MORGEN study                                        | No measurement of wholegrain intake                                        |
| Burke, V<br>2005 <sup>13</sup>         | Predictors of body mass index and associations with cardiovascular risk factors in Australian children: a prospective cohort study                                          | No measurement of wholegrain intake                                        |
| Chuang, S-C<br>2012 <sup>14</sup>      | Fiber intake and total and cause-specific mortality in the European Prospective Investigation into Cancer and Nutrition cohort                                              | No separate analysis of cereal fiber from wholegrains                      |
| Crowe, FL<br>2012 <sup>15</sup>        | Dietary fibre intake and ischaemic heart disease mortality: the European Prospective Investigation into Cancer and Nutrition-Heart study                                    | No separate analysis of cereal fiber from wholegrains                      |
| Djoussé, L<br>2009 <sup>16</sup>       | Relation between modifiable lifestyle factors and lifetime risk of heart failure                                                                                            | No separate analysis of cereal from wholegrains                            |
| Eshak, ES<br>2014 <sup>17</sup>        | Rice consumption is not associated with risk of cardiovascular disease morbidity or mortality in Japanese men and women: a large population-based, prospective cohort study | No separate analysis of brown/unrefined rice                               |
| Flint, AJ<br>2009 <sup>18</sup>        | Whole grains and incident hypertension in men                                                                                                                               | No clinical CVD outcome measured                                           |

|                                     |                                                                                                                                                           |                                                                                                                               |
|-------------------------------------|-----------------------------------------------------------------------------------------------------------------------------------------------------------|-------------------------------------------------------------------------------------------------------------------------------|
| Guo, J 2013 <sup>19</sup>           | Influence of dietary patterns on the risk of acute myocardial infarction in China population: the INTERHEART China study                                  | Only 'Grains' measured for association with risk of MI. No separate analysis for wholegrains                                  |
| Hansen-Krone, IJ 2012 <sup>20</sup> | Heart healthy diet and risk of myocardial infarction and venous thromboembolism. The Tromso Study                                                         | Dietary pattern assessment only. No separate analysis of wholegrains                                                          |
| Iso, H 2007 <sup>21</sup>           | Nutrition and disease in the Japan Collaborative Cohort Study for Evaluation of Cancer (JACC)                                                             | No separate analysis of brown/unrefined rice                                                                                  |
| Jacobs, DR Jr 2000 <sup>22</sup>    | Fiber from whole grains, but not refined grains, is inversely associated with all-cause mortality in older women: the Iowa women's health study           | Fiber from cereals was not exclusively from whole grain products for the high wholegrain fiber group (29% from refined grain) |
| Jansen, MC 1999 <sup>23</sup>       | Dietary fiber and plant foods in relation to colorectal cancer mortality: the seven countries study                                                       | No clinical CVD outcome measured                                                                                              |
| Johnsen, NF 2015 <sup>24</sup>      | Whole-grain products and whole-grain types are associated with lower all-cause and cause-specific mortality in the Scandinavian HELGA cohort              | No combined data for men and woman                                                                                            |
| Kanda, A 1999 <sup>25</sup>         | Association of lifestyle parameters with the prevention of hypertension in elderly Japanese men and women: a four-year follow-up of normotensive subjects | No separate analysis of brown/unrefined rice No clinical CVD outcome measured                                                 |
| Kochar, J 2012 <sup>26</sup>        | Breakfast cereals and risk of hypertension in the Physicians' Health Study I                                                                              | No clinical CVD outcome measured                                                                                              |
| Kokubo, Y 2011 <sup>27</sup>        | Dietary fiber intake and risk of cardiovascular disease in the Japanese population: the Japan Public Health Center-based study cohort                     | No separate analysis of fiber from wholegrains                                                                                |
| Larsson, SC 2016 <sup>28</sup>      | Dietary Approaches to Stop Hypertension Diet and Incidence of Stroke: Results From 2 Prospective Cohorts                                                  | Dietary pattern assessment only. No separate analysis of wholegrains                                                          |
| Li, S 2014 <sup>29</sup>            | Dietary fiber intake and mortality among survivors of myocardial infarction: prospective cohort study                                                     | Participants did not meet the inclusion criteria                                                                              |

|                                          |                                                                                                                                                                      |                                                                                           |
|------------------------------------------|----------------------------------------------------------------------------------------------------------------------------------------------------------------------|-------------------------------------------------------------------------------------------|
| Liang, W 2010 <sup>30</sup>              | White rice-based food consumption and ischemic stroke risk: a case-control study in southern china                                                                   | No separate analysis of brown rice/wholegrains                                            |
| Liu, S 2000 <sup>31</sup>                | A prospective study of whole-grain intake and risk of type 2 diabetes mellitus in US women                                                                           | No clinical CVD outcome measured                                                          |
| Mozaffarian, D 2003 <sup>32</sup>        | Cereal, fruit, and vegetable fiber intake and the risk of cardiovascular disease in elderly individuals                                                              | No separate analysis of cereal fiber from wholegrains                                     |
| Negri, E 2003 <sup>33</sup>              | Fiber intake and risk of nonfatal acute myocardial infarction                                                                                                        | No separate analysis of cereal fiber from wholegrains                                     |
| Oh, K 2005 <sup>34</sup>                 | Carbohydrate intake, glycemic index, glycemic load, and dietary fiber in relation to risk of stroke in women                                                         | No separate analysis of cereal fiber from wholegrains                                     |
| Pan, A 2012 <sup>35</sup>                | Red meat consumption and mortality: results from 2 prospective cohort studies                                                                                        | No analysis of whole grain intake and CVD outcomes                                        |
| Park, Y 2011 <sup>36</sup>               | Dietary fiber intake and mortality in the NIH-AARP diet and health study                                                                                             | No separate analysis of cereal fiber from wholegrains. No combined data for men and woman |
| Pierucci, P 2012 <sup>37</sup>           | Diet and myocardial infarction: a nested case-control study in a cohort of elderly subjects in a Mediterranean area of southern Italy                                | No analysis of wholegrains                                                                |
| Rebello, SA 2014 <sup>38</sup>           | Amount, type, and sources of carbohydrates in relation to ischemic heart disease mortality in a Chinese population: a prospective cohort study                       | No combined data for men and woman                                                        |
| Rodriguez-Campello, A 2014 <sup>39</sup> | Dietary habits in patients with ischemic stroke: a case-control study                                                                                                | No separate analysis of breaded foods from wholegrains                                    |
| Shi, Z 2012 <sup>40</sup>                | Rice intake, weight change and risk of the metabolic syndrome development among Chinese adults: the Jiangsu Nutrition Study (JIN)                                    | No analysis of wholegrain intake and CVD outcomes                                         |
| Steffen, LM 2005 <sup>41</sup>           | Associations of plant food, dairy product, and meat intakes with 15-y incidence of elevated blood pressure in young black and white adults: the Coronary Artery Risk | No clinical CVD outcome measured                                                          |

|                                    |                                                                                                                                                        |                                                                           |
|------------------------------------|--------------------------------------------------------------------------------------------------------------------------------------------------------|---------------------------------------------------------------------------|
|                                    | Development in Young Adults (CARDIA) Study                                                                                                             |                                                                           |
| Streppel, MT 2008 <sup>42</sup>    | Dietary fiber intake in relation to coronary heart disease and all-cause mortality over 40 y: the Zutphen Study                                        | No separate analysis of bread and cereal fiber from wholegrains           |
| Threapleton, DE 2013 <sup>43</sup> | Dietary fibre and cardiovascular disease mortality in the UK Women's Cohort Study                                                                      | No separate analysis of total and breakfast cereal fiber from wholegrains |
| Threapleton, DE 2015 <sup>44</sup> | Dietary fibre intake and risk of ischaemic and haemorrhagic stroke in the UK Women's Cohort Study                                                      | No separate analysis of total and breakfast cereal fiber from wholegrains |
| Wang, L 2007 <sup>45</sup>         | Whole- and refined-grain intakes and the risk of hypertension in women                                                                                 | No clinical CVD outcome measured                                          |
| Wolk, A 1999 <sup>46</sup>         | Long-term intake of dietary fiber and decreased risk of coronary heart disease among women                                                             | No separate analysis of fiber from wholegrains                            |
| Yu, D 2014 <sup>47</sup>           | Adherence to dietary guidelines and mortality: a report from prospective cohort studies of 134,000 Chinese adults in urban Shanghai                    | Dietary pattern assessment only. No separate analysis of wholegrains      |
| Yu, D 2016 <sup>48</sup>           | Dietary glycemic index, glycemic load, and refined carbohydrates are associated with risk of stroke: a prospective cohort study in urban Chinese women | No analysis of wholegrains                                                |

1. Ahn Y, Park SJ, Kwack HK, et al. Rice-eating pattern and the risk of metabolic syndrome especially waist circumference in Korean Genome and Epidemiology Study (KoGES). *BMC Public Health* 2013;**13**:61.
2. Alonso A, Beunza JJ, Bes-Rastrollo M, et al. Vegetable protein and fiber from cereal are inversely associated with the risk of hypertension in a Spanish cohort. *Arch Med Res* 2006;**37**(6):778-86.

3. Altorf-van der Kuil W, Engberink MF, Geleijnse JM, et al. Sources of dietary protein and risk of hypertension in a general Dutch population. *Br J Nutr* 2012;**108**(10):1897-903.
4. Appleby PN, Thorogood M, Mann JI, et al. The Oxford Vegetarian Study: an overview. *Am J Clin Nutr* 1999;**70**(3 Suppl):525S-31S.
5. Assmann KE, Lassale C, Andreeva VA, et al. A Healthy Dietary Pattern at Midlife, Combined with a Regulated Energy Intake, Is Related to Increased Odds for Healthy Aging. *J Nutr* 2015;**145**(9):2139-45.
6. Bae JM, Ahn YO. A nested case-control study on the high-normal blood pressure as a risk factor of hypertension in Korean middle-aged men. *J Korean Med Sci* 2002;**17**(3):328-36.
7. Bazzano LA, He J, Ogden LG, et al. Dietary fiber intake and reduced risk of coronary heart disease in US men and women: the National Health and Nutrition Examination Survey I Epidemiologic Follow-up Study. *Arch Intern Med* 2003;**163**(16):1897-904.
8. Bernstein AM, Rosner BA, Willett WC. Cereal fiber and coronary heart disease: a comparison of modeling approaches for repeated dietary measurements, intermediate outcomes, and long follow-up. *Eur J Epidemiol* 2011;**26**(11):877-86.
9. Bertoia ML, Triche EW, Michaud DS, et al. Mediterranean and Dietary Approaches to Stop Hypertension dietary patterns and risk of sudden cardiac death in postmenopausal women. *Am J Clin Nutr* 2014;**99**(2):344-51.
10. Bingham CM, Lahti-Koski M, Absetz P, et al. Food choices and health during military service: increases in sugar- and fibre-containing foods and changes in anthropometric and clinical risk factors. *Public Health Nutr* 2012;**15**(7):1248-55.
11. Buil-Cosiales P, Zazpe I, Toledo E, et al. Fiber intake and all-cause mortality in the Prevención con Dieta Mediterránea (PREDIMED) study. *Am J Clin Nutr* 2014;**100**(6):1498-507.

12. Burger KN, Beulens JW, Boer JM, et al. Dietary glycemic load and glycemic index and risk of coronary heart disease and stroke in Dutch men and women: the EPIC-MORGEN study. *PLoS One* 2011;**6**(10):e25955.
13. Burke V, Beilin LJ, Simmer K, et al. Predictors of body mass index and associations with cardiovascular risk factors in Australian children: a prospective cohort study. *Int J Obes* 2005;**29**(1):15-23.
14. Chuang S-C, Norat T, Murphy N, et al. Fiber intake and total and cause-specific mortality in the European Prospective Investigation into Cancer and Nutrition cohort. *Am J Clin Nutr* 2012;**96**(1):164-74.
15. Crowe FL, Key TJ, Appleby PN, et al. Dietary fibre intake and ischaemic heart disease mortality: the European Prospective Investigation into Cancer and Nutrition-Heart study. *Eur J Clin Nutr* 2012;**66**(8):950-6.
16. Djoussé L, Driver JA, Gaziano JM, et al. Relation between modifiable lifestyle factors and lifetime risk of heart failure. *JAMA* 2009;**302**(4):394-400.
17. Eshak ES, Hiroyasu I, Kazumasa Y, et al. Rice consumption is not associated with risk of cardiovascular disease morbidity or mortality in Japanese men and women: a large population-based, prospective cohort study. *Am J Clin Nutr* 2014;**100**(1):199-207.
18. Flint AJ, Hu FB, Glynn RJ, et al. Whole grains and incident hypertension in men. *Am J Clin Nutr* 2009;**90**(3):493-98.
19. Guo J, Li W, Wang Y, et al. Influence of dietary patterns on the risk of acute myocardial infarction in China population: the INTERHEART China study. *Chin Med J* 2013;**126**(3):464-70.
20. Hansen-Krone IJ, Enga KF, Njolstad I, et al. Heart healthy diet and risk of myocardial infarction and venous thromboembolism. The Tromso Study. *Thromb Haemost* 2012;**108**(3):554-60.

21. Iso H, Kubota Y. Nutrition and disease in the Japan Collaborative Cohort Study for Evaluation of Cancer (JACC). *Asian Pacific journal of cancer prevention: APJCP* 2007;**8** Suppl:35-80.
22. Jacobs DR, Pereira MA, Meyer KA, et al. Fiber from whole grains, but not refined grains, is inversely associated with all-cause mortality in older women: the Iowa women's health study. *J Am Coll Nutr* 2000;**19**(3 Suppl):326S-30S.
23. Jansen MC, Bueno-de-Mesquita HB, Buzina R, et al. Dietary fiber and plant foods in relation to colorectal cancer mortality: the Seven Countries Study. *Int J Cancer* 1999;**81**(2):174-9.
24. Johnsen NF, Frederiksen K, Christensen J, et al. Whole-grain products and whole-grain types are associated with lower all-cause and cause-specific mortality in the Scandinavian HELGA cohort. *Br J Nutr* 2015;**114**(4):608-23.
25. Kanda A, Hoshiyama Y, Kawaguchi T. Association of lifestyle parameters with the prevention of hypertension in elderly Japanese men and women: a four-year follow-up of normotensive subjects. *Asia Pac J Public Health* 1999;**11**(2):77-81.
26. Kochar J, Gaziano JM, Djousse L. Breakfast cereals and risk of hypertension in the Physicians' Health Study I. *Clin Nutr* 2012;**31**(1):89-92.
27. Kokubo Y, Iso H, Saito I, et al. Dietary fiber intake and risk of cardiovascular disease in the Japanese population: the Japan Public Health Center-based study cohort. *Eur J Clin Nutr* 2011;**65**(11):1233-41.
28. Larsson SC, Wallin A, Wolk A. Dietary Approaches to Stop Hypertension Diet and Incidence of Stroke: Results From 2 Prospective Cohorts. *Stroke* 2016;**47**(4):986-90.
29. Li S, Flint A, Pai JK, et al. Dietary fiber intake and mortality among survivors of myocardial infarction: prospective cohort study. *BMJ* 2014;**348**:g2659.
30. Liang W, Lee AH, Binns CW. White rice-based food consumption and ischemic stroke risk: a case-control study in southern china. *J Stroke Cerebrovasc Dis* 2010;**19**(6):480-84.



31. Liu S, Manson JE, Stampfer MJ, et al. A prospective study of whole-grain intake and risk of type 2 diabetes mellitus in US women. *Am J Public Health* 2000;**90**(9):1409-15.
32. Mozaffarian D, Kumanyika SK, Lemaitre RN, et al. Cereal, fruit, and vegetable fiber intake and the risk of cardiovascular disease in elderly individuals. *JAMA* 2003;**289**(13):1659-66.
33. Negri E, La Vecchia C, Pelucchi C, et al. Fiber intake and risk of nonfatal acute myocardial infarction. *Eur J Clin Nutr* 2003;**57**(3):464-70.
34. Oh K, Hu FB, Cho E, et al. Carbohydrate intake, glycemic index, glycemic load, and dietary fiber in relation to risk of stroke in women. *Am J Epidemiol* 2005;**161**(2):161-9.
35. Pan A, Sun Q, Bernstein AM, et al. Red meat consumption and mortality: results from 2 prospective cohort studies. *Arch Intern Med* 2012;**172**(7):555-63.
36. Park Y, Subar AF, Hollenbeck A, et al. Dietary fiber intake and mortality in the NIH-AARP diet and health study. *Arch Intern Med* 2011;**171**(12):1061-8.
37. Pierucci P, Misciagna G, Ventura MT, et al. Diet and myocardial infarction: a nested case-control study in a cohort of elderly subjects in a Mediterranean area of southern Italy. *Nutr Metab Cardiovasc Dis* 2012;**22**(9):727-33.
38. Rebello SA, Hiromi K, Chen C, et al. Amount, type, and sources of carbohydrates in relation to ischemic heart disease mortality in a Chinese population: a prospective cohort study. *Am J Clin Nutr* 2014;**100**(1):53-64.
39. Rodriguez-Campello A, Jimenez-Conde J, Ois A, et al. Dietary habits in patients with ischemic stroke: a case-control study. *PLoS One* 2014;**9**(12):e114716.
40. Shi Z, Taylor AW, Hu G, et al. Rice intake, weight change and risk of the metabolic syndrome development among Chinese adults: the Jiangsu Nutrition Study (JIN). *Asia Pac J Clin Nutr* 2012;**21**(1):35-43.

41. Steffen LM, Kroenke CH, Yu X, et al. Associations of plant food, dairy product, and meat intakes with 15-y incidence of elevated blood pressure in young black and white adults: the Coronary Artery Risk Development in Young Adults (CARDIA) Study. *Am J Clin Nutr* 2005;**82**(6):1169-77; quiz 363-4.
42. Streppel MT, Ocké MC, Boshuizen HC, et al. Dietary fiber intake in relation to coronary heart disease and all-cause mortality over 40 y: the Zutphen Study. *Am J Clin Nutr* 2008;**88**(4):1119-25.
43. Threapleton DE, Greenwood DC, Burley VJ, et al. Dietary fibre and cardiovascular disease mortality in the UK Women's Cohort Study. *Eur J Epidemiol* 2013;**28**(4):335-46.
44. Threapleton DE, Burley VJ, Greenwood DC, et al. Dietary fibre intake and risk of ischaemic and haemorrhagic stroke in the UK Women's Cohort Study. *Eur J Clin Nutr* 2015;**69**(4):467-74.
45. Wang L, Gaziano JM, Liu S, et al. Whole- and refined-grain intakes and the risk of hypertension in women. *Am J Clin Nutr* 2007;**86**(2):472-79.
46. Wolk A, Manson KE, Stampfer MJ, et al. Long-term intake of dietary fiber and decreased risk of coronary heart disease among women. *JAMA* 1999;**281**(21):1998-2004.
47. Yu D, Zhang X, Xiang Y-B, et al. Adherence to dietary guidelines and mortality: a report from prospective cohort studies of 134,000 Chinese adults in urban Shanghai. *Am J Clin Nutr* 2014.
48. Yu D, Zhang X, Shu XO, et al. Dietary glycemic index, glycemic load, and refined carbohydrates are associated with risk of stroke: a prospective cohort study in urban Chinese women. *Am J Clin Nutr* 2016;**104**(5):1345-51.
