# Supplementary material for: Association of industry ties with outcomes of studies examining the effect of wholegrain foods on cardiovascular disease and mortality: systematic review and meta-analysis
Source: PubMed Central journal article supplement — BMJ Open. 2019 May 19;9(5):e022912. doi: 10.1136/bmjopen-2018-022912 (PMC6530454; doi:10.1136/bmjopen-2018-022912), 2019-05-19
Supplement: bmjopen-2018-022912supp004.pdf [file bmjopen-2018-022912supp004.pdf]

#### Supplementary File 4: Characteristics of Included Studies

| Study ID                       | Study Design | Length of Intervention /Follow up          | Number of Participants | Age (mean years) | Exposure (highest tertile/quartile/quintile or 'yes' to wholegrain foods) | Comparison (lowest tertile/quartile/quintile or 'no' to wholegrain foods) | Outcomes Measured                                                           | Funding Source              | Disclosed author conflicts of interest |
|--------------------------------|--------------|--------------------------------------------|------------------------|------------------|---------------------------------------------------------------------------|---------------------------------------------------------------------------|-----------------------------------------------------------------------------|-----------------------------|----------------------------------------|
| Djousse, L 2007 <sup>1*</sup>  | Cohort       | 19.6 years (average)                       | 21,376                 | 53.7 ±9.5 years  | Wholegrain Breakfast Cereal ≥ 7 (1 serving=1 cup [250 mL]) servings/week  | Wholegrain Breakfast Cereal 0 servings/week                               | Heart Failure                                                               | Non-Industry <sup>1**</sup> | Yes <sup>a</sup>                       |
| Holmberg, S 2009 <sup>2</sup>  | Cohort       | 12 years                                   | 1,752                  | 50.2 years       | Whole meal bread (wholegrain rye bread and crisp/hard bread)              | White or Rye bread                                                        | Coronary Heart Disease Death or Event (death or hospitalization)            | Industry <sup>2</sup>       | No disclosure                          |
| Huang, T 2015 <sup>3</sup>     | Cohort       | 14 years (average)                         | 367,442                | 61.7 years       | Wholegrain 1.20 oz eq/day                                                 | Wholegrain 0.13 oz eq/day                                                 | Cardiovascular Disease Death                                                | Industry <sup>3</sup>       | Yes <sup>b</sup>                       |
| Jacobs, DRJr 1998 <sup>4</sup> | Cohort       | 10 years                                   | 34,492                 | 55–69 years      | Wholegrain 22.5 servings/week (median)                                    | Wholegrain 1.5 servings/week (median)                                     | Ischemic Heart Disease Death                                                | Non-Industry <sup>4</sup>   | No disclosure                          |
| Jacobs, DRJr 1999 <sup>5</sup> | Cohort       | 10 years                                   | 38,740                 | 61.5 years       | Wholegrain 22.5 servings/week (median)                                    | Wholegrain 1.5 servings/week (median)                                     | Cardiovascular Disease Death (all cardiovascular disease)                   | Non-Industry <sup>5</sup>   | No disclosure                          |
| Jacobs, DRJr 2001 <sup>6</sup> | Cohort       | Baseline 1977-83, followed through to 1994 | 33,848                 | 35-56 years      | Wholegrain Bread Score (2.25-5.40) ***                                    | Wholegrain Bread Score (0.05-0.60) ***                                    | Cardiovascular Disease Death (total cardiovascular disease)                 | Non-Industry <sup>6</sup>   | No disclosure                          |
| Jacobs, DRJr 2007 <sup>7</sup> | Cohort       | 17 years                                   | 27,312                 | 55–69 years      | Wholegrain ≥ 19 servings/week                                             | Wholegrain 0–3.5 servings/week                                            | Cardiovascular Disease Death                                                | Industry <sup>7</sup>       | No <sup>c</sup>                        |
| Jensen, MK 2004 <sup>8</sup>   | Cohort       | 14 years                                   | 42,850                 | 40-75 years      | Wholegrain 42.4 g/day (median)                                            | Wholegrain 3.5 g/day (median)                                             | Coronary Heart Disease Death or Event (non-fatal MI infarction & fatal CHD) | Industry <sup>8</sup>       | No <sup>d</sup>                        |

|                                   |              |                               |         |                                        |                                                                                      |                                                                |                                                                                                                                                                                               |                            |                  |
|-----------------------------------|--------------|-------------------------------|---------|----------------------------------------|--------------------------------------------------------------------------------------|----------------------------------------------------------------|-----------------------------------------------------------------------------------------------------------------------------------------------------------------------------------------------|----------------------------|------------------|
| Li, Y 2015 <sup>9</sup>           | 2 Cohorts    | 30 years & 24 years           | 127,536 | NHS 30-55 years<br>HPFS 40-75 years    | Wholegrain 4.6 % of total Energy Intake                                              | Wholegrain 0.4 % of total Energy Intake                        | Coronary Heart Disease Death or Event (non-fatal MI & CHD deaths)                                                                                                                             | Non-Industry <sup>9</sup>  | Yes <sup>e</sup> |
| Liu, S 1999 <sup>10</sup>         | Cohort       | 10 years                      | 75,521  | 38-63 years                            | Wholegrain 2.70 servings/day (median)                                                | Wholegrain 0.13 servings/day (median)                          | Coronary Heart Disease Death or Event (non-fatal MI & fatal CHD)                                                                                                                              | Non-Industry <sup>10</sup> | No disclosure    |
| Liu, S 2000 <sup>11</sup>         | Cohort       | 12 years                      | 75,521  | 38-63 years                            | Wholegrain 2.70 servings/day (median)                                                | Wholegrain 0.13 servings/day (median)                          | Ischemic Stroke Death or Event                                                                                                                                                                | Non-Industry <sup>11</sup> | No disclosure    |
| Liu, S 2003 <sup>12</sup>         | Cohort       | 5.5 years (average)           | 86,190  | 40-84 years                            | Wholegrain Breakfast Cereal 1 servings/day                                           | Rarely                                                         | Cardiovascular Disease Deaths                                                                                                                                                                 | Non-Industry <sup>12</sup> | Yes <sup>f</sup> |
| Lockheart, MSK 2007 <sup>13</sup> | Case Control |                               | 211     | Case 62.5 ± 7.7<br>Control 62.25 ± 7.7 | Wholegrain Breakfast Cereal 36 g/day (median) & Wholegrain breads 240 g/day (median) | 0<br>94 g/day                                                  | Myocardial Infarction (first MI)                                                                                                                                                              | Industry <sup>13</sup>     | No Disclosure    |
| Mizrachi, A 2009 <sup>14</sup>    | Cohort       | 24 years                      | 3,932   | 40-74 years                            | Wholegrain Men 280-1321 g/day (range)<br>Women 195-963 g/day (range)                 | Wholegrain Men 0-139 g/day (range)<br>Women 0-89 g/day (range) | Cerebrovascular Disease Death or Event (total strokes, including all acute strokes, subarachnoidal haemorrhages and other, undefined strokes; ischaemic stroke and intracerebral haemorrhage) | Non-Industry <sup>14</sup> | No <sup>g</sup>  |
| Muraki I, 2015 <sup>15</sup>      | 3 Cohorts    | 26 years, 20 years & 24 years | 207,556 | Not available                          | Brown Rice ≥ 5 servings/week                                                         | Brown Rice < 1 servings/week                                   | Cardiovascular Disease Death or Event (nonfatal)                                                                                                                                              | Non-Industry <sup>15</sup> | No <sup>h</sup>  |

|                                  |        |                                            |        |             |                                    |                                    |                                                                                                                                                                                                                                                                            |                            |                  |
|----------------------------------|--------|--------------------------------------------|--------|-------------|------------------------------------|------------------------------------|----------------------------------------------------------------------------------------------------------------------------------------------------------------------------------------------------------------------------------------------------------------------------|----------------------------|------------------|
|                                  |        |                                            |        |             |                                    |                                    | MI, fatal CAD, and stroke (nonfatal or fatal))                                                                                                                                                                                                                             |                            |                  |
| Nettleton, JA 2008 <sup>16</sup> | Cohort | 13.3 years (average)                       | 14,153 | 45-64 years | Wholegrain 1.3 ± 0.01 servings/day | Wholegrain 1.1 ± 0.04 servings/day | Heart Failure Death or Event                                                                                                                                                                                                                                               | Non-Industry <sup>16</sup> | No <sup>i</sup>  |
| Sahyoun, NR 2006 <sup>17</sup>   | Cohort | Baseline 1981-84, followed through to 1995 | 535    | 60-98 years | Wholegrain >1.94 servings/day      | Wholegrain ≤0.56 servings/day      | Cardiovascular Disease Death                                                                                                                                                                                                                                               | Non-Industry <sup>17</sup> | No <sup>j</sup>  |
| Sonestedt, E 2015 <sup>18</sup>  | Cohort | 14 year (average)                          | 26,445 | 44-74 years | Wholegrain 2.5 portions/day        | Wholegrain 0 portions/day          | Cardiovascular Disease Death or Event (Incident CVD events, Stroke events, CHD (fatal or non-fatal myocardial infarction or death due to ischemic heart disease), Ischemic stroke).                                                                                        | Non-Industry <sup>18</sup> | No Disclosure    |
| Steffen, L M 2003 <sup>19</sup>  | Cohort | 11 years                                   | 11,940 | 45-64 years | Wholegrain 3.0 servings/day        | Wholegrain 0.1 servings/day        | Coronary Artery Disease Death or Event (the first definite or probable MI, silent MI by electrocardiography, definite CAD death, or coronary revascularization) & Ischemic Stroke Death or Event (first definite or probable cardioembolic or thrombotic brain infarction) | Non-Industry <sup>19</sup> | Yes <sup>k</sup> |

|                              |                 |                     |         |                                     |                                                                 |                                                                 |                                     |                            |                 |
|------------------------------|-----------------|---------------------|---------|-------------------------------------|-----------------------------------------------------------------|-----------------------------------------------------------------|-------------------------------------|----------------------------|-----------------|
| Tavani, A 2003 <sup>20</sup> | Case Control    |                     | 881     | 25–79 years                         | Wholegrain Bread Consumers                                      | Wholegrain Bread Non-Consumers                                  | Myocardial Infarction (first acute) | Non-Industry <sup>20</sup> | No Disclosure   |
| Tavani, A 2004 <sup>21</sup> | 3 Case Controls |                     | 1,602   | 17–79 years                         | Wholegrain >2 portions/per week                                 | Wholegrain <2 portions/per week                                 | Myocardial Infarction (first acute) | Non-Industry <sup>21</sup> | No Disclosure   |
| Wu, H 2015 <sup>22</sup>     | 2 Cohort        | 26 years & 24 years | 118,085 | NHS 30-55 years<br>HPFS 32-87 years | Wholegrain<br>NHS 33 g/day (median)<br>HPFS 47.8 g/day (median) | Wholegrain<br>NHS 4.2 g/day (median)<br>HPFS 5.9 g/day (median) | Cardiovascular Disease Death        | Non-Industry <sup>22</sup> | No <sup>1</sup> |

\*Superscript is the reference citation

\*\* Superscript is in reference to the verbatim description of funding source

\*Wholegrain bread score: slices eaten per day (question 1) times the percentage wholegrain flour used in bread. Q5 = 9 slices of bread usually eaten per day x

60% wholegrain flour. Q1 = 1 slice of bread per day x 5% wholegrain flour

### **Description of Funding Source (Verbatim)**

1. The PHS is supported by grants CA-34944 and CA-40360 from the National Cancer Institute and grants HL-26490 and HL-34595 from the National Heart Lung and Blood Institute (NHLBI), Bethesda, Maryland. Dr Djousse´ is supported by grant K01 HL70444 from the NHLBI
2. This study was supported by grants from AFA Insurance, LRF Research Foundation, The Swedish Council for Working Life and Social Research and Kronoberg County Council
3. This study is funded by an unrestricted research fund from NutraSource. Dr. Qi was supported by grants from the National Heart, Lung, and Blood Institute (HL071981), the National Institute of Diabetes and Digestive and Kidney Diseases (DK091718), the Boston Obesity Nutrition Research Center (DK46200), and United States–Israel Binational Science Foundation Grant 2011036. Dr. Qi was a recipient of the American Heart Association Scientist Development Award (0730094 N). Funding from NutraSource. There were no other relationships or activities that could appear to have influenced the submitted work
4. Supported by the National Institutes of Health (research grant CA-39742)
5. This research was supported by grant CA-39742 from the National Institutes of Health
6. Institute for Nutrition Research, University of Oslo and National Health Screening Service, Oslo, Norway

7. RB was supported by grants from the Norwegian Research Council, The Johan Throne Holst Nutrition Research Foundation, and The Norwegian Cancer Society. DRJ was supported by the Norwegian Research Council and by a grant (RO1 CA39742) from the National Cancer Institute.
8. Supported by research grants HL35464 and CA55075 from the National Institutes of Health and a scholarship from the Danish Research Foundation (to MKJ). The Kellogg Company provided unrestricted funding of the development of the whole-grain database
9. The cohorts were supported by grants UM1 CA186107, R01 HL034594, R01 HL35464, R01 HL60712, and UM1 CA167552 from the National Institutes of Health.
10. Supported by research grants HL24074, HL34594, and CA40356 and by nutrition training grant T32DK07703 from the National Institutes of Health
11. The work reported in this article was supported by grants CA40356, HL24074, HL34594, and DK02767 from the National Institutes of Health
12. Supported by grants HL-42441 and DK02767 from the National Institutes of Health
13. The present study was supported by NIH NRSA T32HL007779. CVD Epidemiology and Prevention, American Heart Association, Greater Midwest Affiliate. Throne Holst's Foundation for Nutrition Research. The Norwegian Association of Margarine Producers. DeNoFa Fabriker A/S and Tine Norwegian Dairies

14. The present study received funds from the Social Insurance Institution, Finland.
15. Supported by NIH grants CA50385, CA87969, CA176726, CA167552, HL60712, HL034594, HL088521, and HL35464. QS was supported by a career development grant R00HL098459 sponsored by the National Heart, Lung, and Blood Institute. FI was supported by Medical Research Council Epidemiology Unit Core Support (MC\_UU\_12015/5)
16. This research was supported by the National Institutes of Health grant HL73366, training grant T32 HL07779, and contracts N01-HC-55015, N01-HC-55016, N01-HC-55018, N01-HC-55019, N01-HC-55020, N01-HC-55021, and N01- HC-55022 from the National Heart, Lung, and Blood Institute.
17. Supported by the US Department of Agriculture, under agreement no. 58-1950-4-401
18. This study was supported by the Swedish Medical Research Council, the Swedish Heart and Lung Foundation, the Skåne University Hospital, the Albert Pålsson Research Foundation, and the Crafoord Foundation
19. Supported by the National Heart, Lung, and Blood Institute (contract nos. N01-HC-55015, N01-HC-55016, HC-55018, N01-HC-55019, HC-55020, N01-HC-55021, and N01-HC-55022)
20. This study was partly supported by "Ministero della Salute" (contract No 177, RF 2001).
21. Partly supported by "Ministero della Salute" (Contract n.177, RF 2001) and by the Commission of the European Communities (Contract No. QLK1-CT-2000-00069)

22. This work was supported by research grants R01 DK58845 (Dr Hu), P01 CA87969, R01 HL034594, UM1 CA167552 (DrWillett), R01 HL35464 (Dr Rimm), HL60712 (DrHu), U54CA155626 (Dr Hu), and CA055075 from the National Institutes of Health and Career Development Award R00HL098459 from the National Heart, Lung, and Blood Institute (Dr Sun)



### Description of Author Disclosure Statement (Verbatim)

- a) Dr Gaziano has received investigator-initiated research grants from BASF, DSM Pharmaceuticals, Wyeth Pharmaceuticals, McNeil Consumer Products, and Pliva as well as honoraria from Bayer and Pfizer for speaking engagements. He is a consultant for Bayer, McNeil Consumer Products, Wyeth Pharmaceuticals, Merck, Nutraquest, and GlaxoSmithKline
- b) A Lee NutraSource (AWL), Royal Oak, MI 48073, USA. S Cho NutraSource (SSC), Clarksville, MD 21029, USA
- c) None of the authors had a conflict of interest
- d) None of the authors had any conflicts of interest
- e) Dr. Hu has received honoraria from the Hass Avocado Board for participating in an academic symposium; and grant support from Metagenics and the California Walnut Commission
- f) In 2001 SL received honoraria from General Mills Co for a presentation unrelated to this article
- g) None of the authors had any personal or financial conflict of interest.
- h) All authors reported no conflicts of interest related to the study.
- i) The authors have no conflicts of interest to report
- j) None of the authors had a conflict of interest
- k) None of the authors had any conflicts of interest except for DRJ, who holds a research award from General Mills, Inc, Minneapolis

l) None reported

## References

1. Djousse L, Gaziano JM. Breakfast cereals and risk of heart failure in the physicians' health study I. *Archives of Internal Medicine*. 2007;167(19):2080-2085.
2. Holmberg S, Thelin A, Stiernstrom EL. Food choices and coronary heart disease: a population based cohort study of rural Swedish men with 12 years of follow-up. *International Journal of Environmental Research & Public Health [Electronic Resource]*. 2009;6(10):2626-2638.
3. Huang T, Xu M, Lee A, Cho S, Qi L. Consumption of whole grains and cereal fiber and total and cause-specific mortality: prospective analysis of 367,442 individuals. *BMC Medicine*. 2015;13(1):59.
4. Jacobs Jr DR, Meyer KA, Kushi LH, Folsom AR. Whole-grain intake may reduce the risk of ischemic heart disease death in postmenopausal women: The Iowa women's health study. *American Journal of Clinical Nutrition*. 1998;68(2):248-257.
5. Jacobs DR, Jr., Meyer KA, Kushi LH, Folsom AR. Is whole grain intake associated with reduced total and cause-specific death rates in older women? The Iowa Women's Health Study. *American Journal of Public Health*. 1999;89(3):322-329.
6. Jacobs DR, Jr., Meyer HE, Solvoll K. Reduced mortality among whole grain bread eaters in men and women in the Norwegian County Study. *European Journal of Clinical Nutrition*. 2001;55(2):137-143.
7. Jacobs Jr DR, Andersen LF, Blomhoff R. Whole-grain consumption is associated with a reduced risk of noncardiovascular, noncancer death attributed to inflammatory diseases in the Iowa Women's Health Study. *American Journal of Clinical Nutrition*. 2007;85(6):1606-1614.
8. Jensen MK, Koh-Banerjee P, Hu FB, et al. Intakes of whole grains, bran, and germ and the risk of coronary heart disease in men. *American Journal of Clinical Nutrition*. 2004;80(6):1492-1499.
9. Li Y, Hruby A, Bernstein AM, et al. Saturated Fats Compared With Unsaturated Fats and Sources of Carbohydrates in Relation to Risk of Coronary Heart Disease: A Prospective Cohort Study. *Journal of the American College of Cardiology (JACC)*. 2015;66(14):1538-1548.
10. Liu S, Stampfer MJ, Hu FB, et al. Whole-grain consumption and risk of coronary heart disease: Results from the Nurses' Health Study. *American Journal of Clinical Nutrition*. 1999;70(3):412-419.
11. Liu S, Manson JE, Stampfer MJ, et al. Whole grain consumption and risk of ischemic stroke in women: A prospective study. *JAMA*. 2000;284(12):1534-1540.
12. Liu S, Sesso HD, Manson JE, Willett WC, Buring JE. Is intake of breakfast cereals related to total and cause-specific mortality in men? *American Journal of Clinical Nutrition*. 2003;77(3):594-599.
13. Lockheart MS, Steffen LM, Rebnord HM, et al. Dietary patterns, food groups and myocardial infarction: a case-control study. *British Journal of Nutrition*. 2007;98(2):380-387.
14. Mizrahi A, Knekt P, Montonen J, Laaksonen MA, Heliovaara M, Jarvinen R. Plant foods and the risk of cerebrovascular diseases: a potential protection of fruit consumption. *The British journal of nutrition*. 2009;102(7):1075-1083.
15. Muraki I, Wu H, Imamura F, et al. Rice consumption and risk of cardiovascular disease: results from a pooled analysis of 3 U.S. cohorts. *American Journal of Clinical Nutrition*. 2015;101(1):164-172.

16. Nettleton JA, Steffen LM, Loehr LR, Rosamond WD, Folsom AR. Incident heart failure is associated with lower whole-grain intake and greater high-fat dairy and egg intake in the Atherosclerosis Risk in Communities (ARIC) study. *J Am Diet Assoc.* 2008;108(11):1881-1887.
17. Sahyoun NR, Jacques PF, Zhang XL, Juan W, McKeown NM. Whole-grain intake is inversely associated with the metabolic syndrome and mortality in older adults. *The American journal of clinical nutrition.* 2006;83(1):124-131.
18. Sonestedt E, Hellstrand S, Schulz CA, et al. The association between carbohydrate-rich foods and risk of cardiovascular disease is not modified by genetic susceptibility to dyslipidemia as determined by 80 validated variants. *PLoS ONE [Electronic Resource]*. 2015;10(4):e0126104.
19. Steffen LM, Jacobs DR, Jr., Stevens J, Shahar E, Carithers T, Folsom AR. Associations of whole-grain, refined-grain, and fruit and vegetable consumption with risks of all-cause mortality and incident coronary artery disease and ischemic stroke: the Atherosclerosis Risk in Communities (ARIC) Study. *American Journal of Clinical Nutrition.* 2003;78(3):383-390.
20. Tavani A, Bosetti C, Negri E, Augustin LS, Jenkins DJA, La Vecchia C. Carbohydrates, dietary glycaemic load and glycaemic index, and risk of acute myocardial infarction. *Heart.* 2003;89(7):722-726.
21. Tavani A, Bertuzzi M, Gallus S, Negri E, La Vecchia C. Risk factors for non-fatal acute myocardial infarction in Italian women. *Preventive Medicine.* 2004;39(1):128-134.
22. Wu H, Flint AJ, Qi Q, et al. Association between dietary whole grain intake and risk of mortality: two large prospective studies in US men and women. *JAMA Internal Medicine.* 2015;175(3):373-384.
